# Supplementary material for: Understanding the reaction mechanism of gold-catalyzed reactions of 2,1-benzisoxazoles with propiolates and ynamides
Source: Royal Society of Chemistry journal article supplement (doi:10.1039/d1qo00217a), 2021-01-01
Supplement: d1qo00217a1.pdf [file d1qo00217a1.pdf]

## Electronic Supplementary Information

# Understanding the Reaction Mechanism of Gold-Catalyzed Reactions of 2,1-Benzisoxazoles with Propiolates and Ynamides

Zhaoyuan Yu,<sup>‡b,d</sup> Shujuan Lin,<sup>‡a,c</sup> and Zhenyang Lin<sup>\*a</sup>

<sup>a</sup> Department of Chemistry, The Hong Kong University of Science and Technology, Kowloon, Hong Kong, China.

**E-mail:** chzlin@ust.hk.

<sup>b</sup> The Institute of Drug Discovery Technology, Ningbo University, Ningbo, 315211, PR China.

<sup>c</sup> State Key Laboratory of Structural Chemistry, Fujian Institute of Research on the Structure of Matter, Chinese Academy of Sciences, Fuzhou, Fujian 350002, P. R. China.

<sup>d</sup> College of Chemistry, and Institute of Green Catalysis, Zhengzhou University, Zhengzhou 450001, P. R. China.

## CONTENT

|                                                                                                                                                                                                                                                                                                                                                                                                                                                                                                   |    |
|---------------------------------------------------------------------------------------------------------------------------------------------------------------------------------------------------------------------------------------------------------------------------------------------------------------------------------------------------------------------------------------------------------------------------------------------------------------------------------------------------|----|
| 1. Complete reference of Gaussian 09                                                                                                                                                                                                                                                                                                                                                                                                                                                              | 2  |
| 2. Figure S1. Energy profiles calculated for the 1,3-proton migrations from <b>Gp</b> and <b>Kp</b> . The relative free energies are given in kcal/mol.                                                                                                                                                                                                                                                                                                                                           | 3  |
| 3. Figure S2. Energy profile for the isomerization process in gold-catalyzed annulation of anthranil with the propiolate PhC≡CCO <sub>2</sub> Me. The relative free energies are given in kcal/mol.                                                                                                                                                                                                                                                                                               | 4  |
| 4. Figure S3. Energy profiles calculated for the 1,3-proton migrations from <b>Gy</b> and <b>Ky</b> . The relative free energies are given in kcal/mol.                                                                                                                                                                                                                                                                                                                                           | 5  |
| 5. Figure S4. (a) The optimized geometries for the N–O bond cleavage transition states <b>TSE<sub>p1-Fp</sub></b> and <b>TSE<sub>p1-Mp</sub></b> . (b) The optimized geometries for the of N–O bond cleavage transition states <b>TSE<sub>p1L-FpL</sub></b> and <b>TSE<sub>p1L-MpL</sub></b> by employing the experimentally used ligand IPr and the real substrate PhC≡CCO <sub>2</sub> <i>t</i> Bu. The relative free energies are given in kcal/mol. The distances are given in angstroms (Å). | 6  |
| 6. Table S1. B3LYP-D3 electronic energies in gas phase, M06 electronic energies in dichloroethane, thermal correction to enthalpies, thermal correction to Gibbs free energies and B3LYP-D3 calculated imaginary frequencies.                                                                                                                                                                                                                                                                     | 7  |
| 7. Table S2. B3LYP-D3 electronic energies in gas phase, M06 electronic energies in trifluoromethylbenzene, thermal correction to enthalpies, thermal correction to Gibbs free energies and B3LYP-D3 calculated imaginary frequencies.                                                                                                                                                                                                                                                             | 9  |
| 8. Table S3. Comparison of the relative free energies calculated for the gold-catalyzed reaction of anthranil with the propiolate (PhC≡CCO <sub>2</sub> Me) using M06 and B3LYP-D3 methods                                                                                                                                                                                                                                                                                                        | 11 |
| 9. Table S4. Comparison of the relative free energies calculated for the gold-catalyzed reaction of anthranil with the ynamide (PhC≡CNMeMs) using M06 and B3LYP-D3 methods                                                                                                                                                                                                                                                                                                                        | 13 |
| 10. B3LYP-D3 geometries for all the optimized compounds and transition states.                                                                                                                                                                                                                                                                                                                                                                                                                    | 15 |

## **Complete reference of Gaussian 09**

Gaussian 09, Revision D.01, M. J. Frisch, G. W. Trucks, H. B. Schlegel, G. E. Scuseria, M. A. Robb, J. R. Cheeseman, G. Scalmani, V. Barone, B. Mennucci, G. A. Petersson, H. Nakatsuji, M. Caricato, X. Li, H. P. Hratchian, A. F. Izmaylov, J. Bloino, G. Zheng, J. L. Sonnenberg, M. Hada, M. Ehara, K. Toyota, R. Fukuda, J. Hasegawa, M. Ishida, T. Nakajima, Y. Honda, O. Kitao, H. Nakai, T. Vreven, J. A. Montgomery, Jr., J. E. Peralta, F. Ogliaro, M. Bearpark, J. J. Heyd, E. Brothers, K. N. Kudin, V. N. Staroverov, T. Keith, R. Kobayashi, J. Normand, K. Raghavachari, A. Rendell, J. C. Burant, S. S. Iyengar, J. Tomasi, M. Cossi, N. Rega, J. M. Millam, M. Klene, J. E. Knox, J. B. Cross, V. Bakken, C. Adamo, J. Jaramillo, R. Gomperts, R. E. Stratmann, O. Yazyev, A. J. Austin, R. Cammi, C. Pomelli, J. W. Ochterski, R. L. Martin, K. Morokuma, V. G. Zakrzewski, G. A. Voth, P. Salvador, J. J. Dannenberg, S. Dapprich, A. D. Daniels, O. Farkas, J. B. Foresman, J. V. Ortiz, J. Cioslowski, and D. J. Fox, Gaussian, Inc., Wallingford CT, 2013.

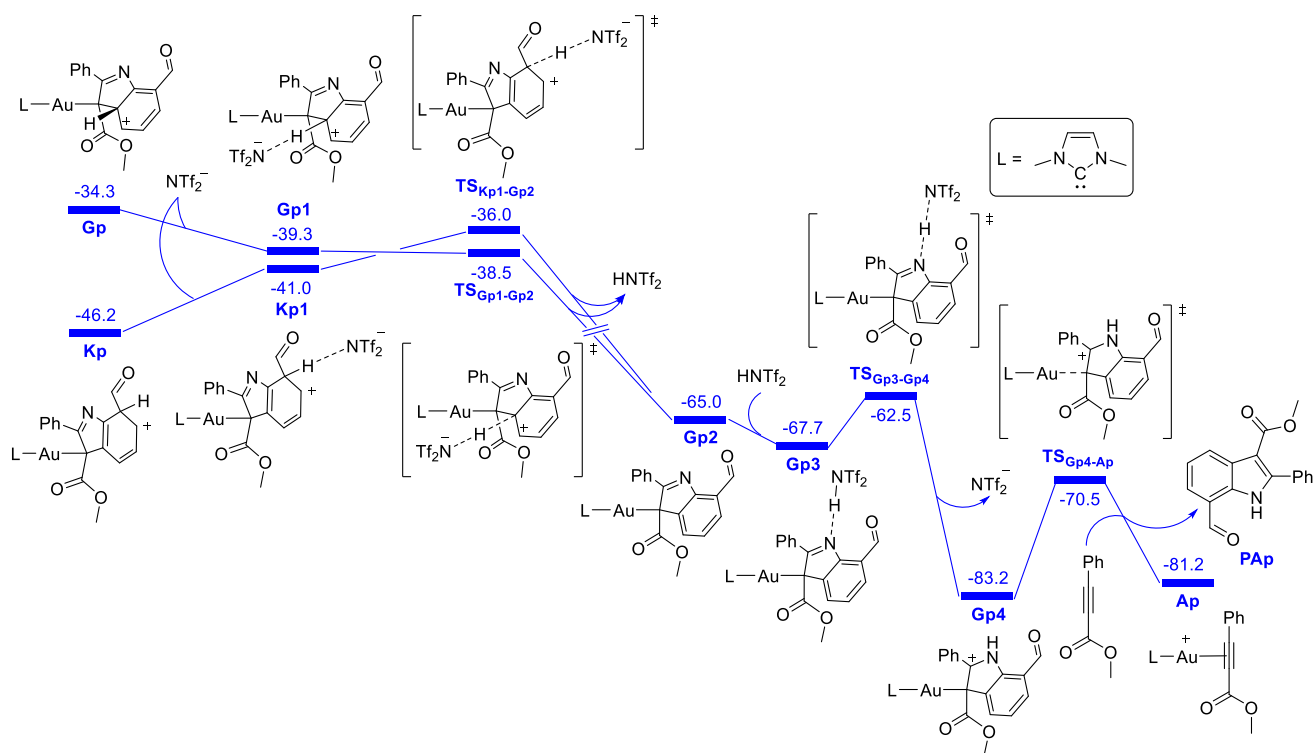

**Figure S1.** Energy profiles calculated for the 1,3-proton migrations from **Gp** and **Kp**. The relative free energies are given in kcal/mol.

One point is worth commenting on here. As mentioned, in the gold-catalyzed annulation of anthranil with the propiolate  $\text{PhC}\equiv\text{CCO}_2\text{Me}$ , we failed to locate an isomerization process between **Fp** and **Mp**. Instead, we were able to calculate the isomerization process between **Fp1** and **Np** (Figure S3). We see that the isomerization process gives slightly higher barrier than the direct C–C bond coupling process (Paths A and B shown in Figure 2).

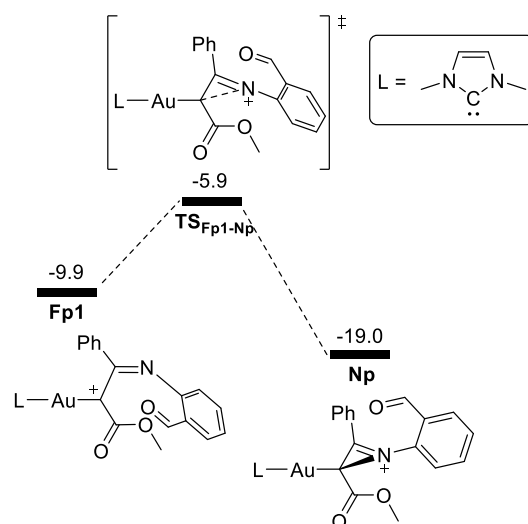

**Figure S2.** Energy profile for the isomerization process in gold-catalyzed annulation of anthranil with the propiolate  $\text{PhC}\equiv\text{CCO}_2\text{Me}$ . The relative free energies are given in kcal/mol.

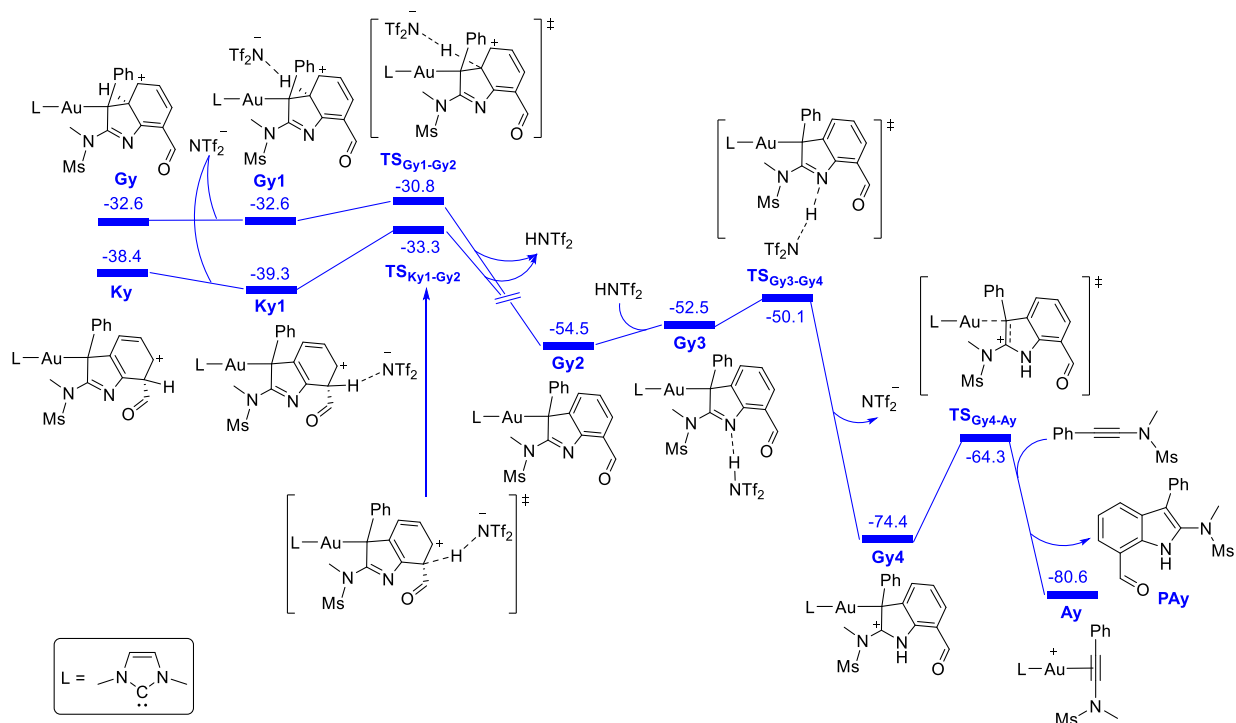

**Figure S3.** Energy profiles calculated for the 1,3-proton migrations from **Gy** and **Ky**. The relative free energies are given in kcal/mol.

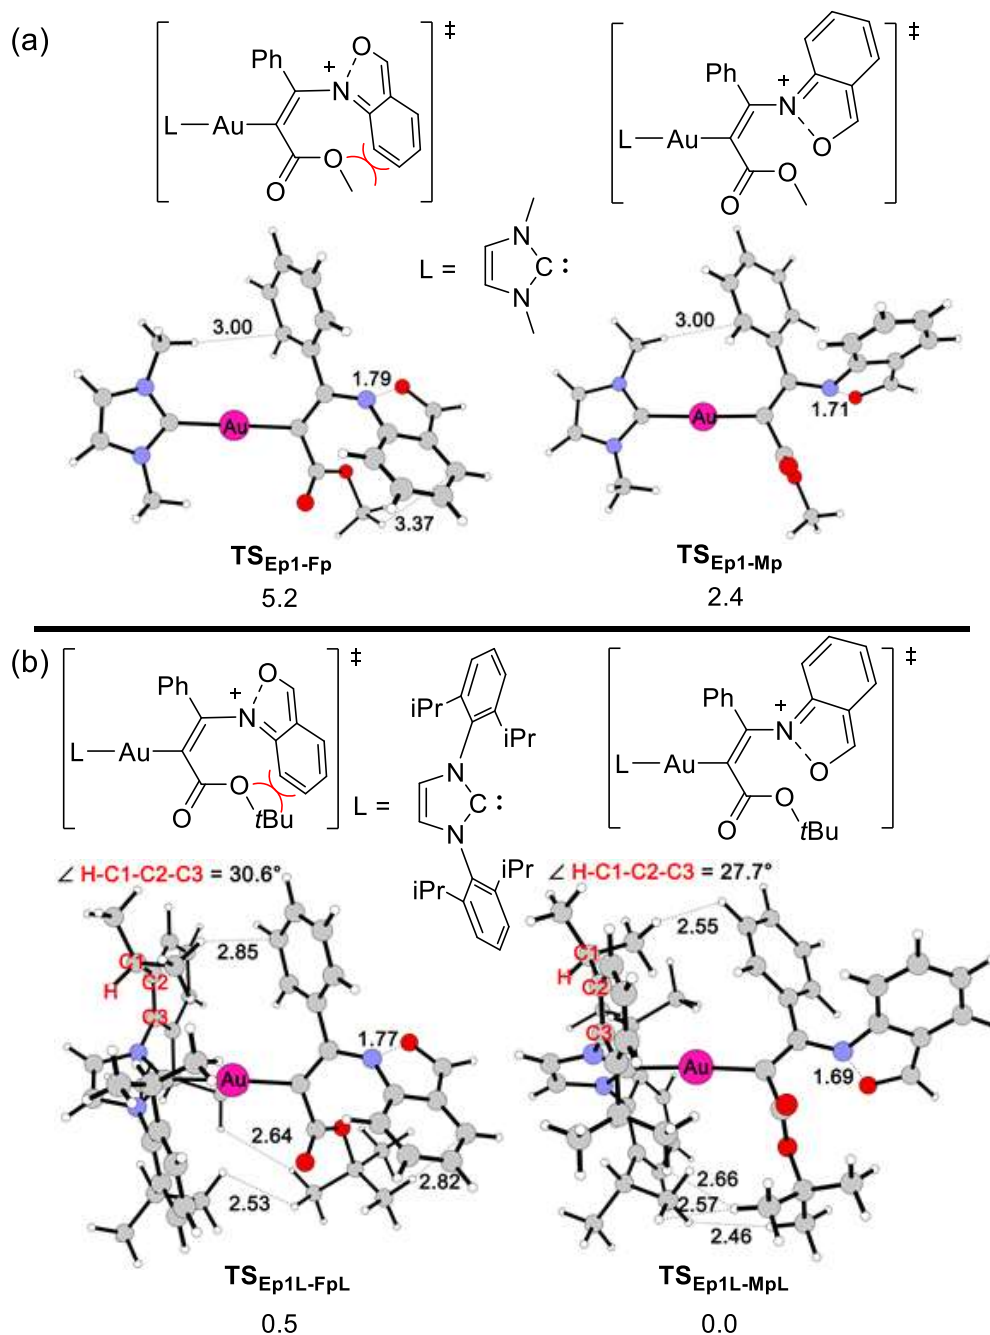

**Figure S4.** (a) The optimized geometries for the N–O bond cleavage transition states  $\text{TS}_{\text{Ep1-Fp}}$  and  $\text{TS}_{\text{Ep1-Mp}}$ . (b) The optimized geometries for the of N–O bond cleavage transition states  $\text{TS}_{\text{Ep1L-FpL}}$  and  $\text{TS}_{\text{Ep1L-MpL}}$  by employing the experimentally used ligand IPr and the real substrate  $\text{PhC}\equiv\text{CCO}_2t\text{Bu}$ . The relative free energies are given in kcal/mol. The distances are given in angstroms ( $\text{\AA}$ ).

**Table S1. B3LYP-D3 electronic energies in gas phase, M06 electronic energies in dichloroethane, thermal correction to enthalpies, thermal correction to Gibbs free energies and B3LYP-D3 calculated imaginary frequencies.**

| Geometry                           | $E_{\text{B3LYP-D3}}^1$ | $E_{\text{M06(dichloroethane)}}^2$ | Correction of $H^3$ | Correction of $G^4$ | IF <sup>5</sup> |
|------------------------------------|-------------------------|------------------------------------|---------------------|---------------------|-----------------|
| <b>Ap</b>                          | -976.442519             | -976.409896                        | 0.307692            | 0.226554            | -               |
| <b>anthranil</b>                   | -399.664692             | -399.494410                        | 0.112155            | 0.075194            | -               |
| <b>TS<sub>Ap-Ep1</sub></b>         | -1376.129654            | -1375.905286                       | 0.421017            | 0.324197            | -114.6          |
| <b>TS<sub>Ap-Ep2</sub></b>         | -1376.119982            | -1375.895991                       | 0.420819            | 0.324902            | -172.6          |
| <b>Ep1</b>                         | -1376.163974            | -1375.937861                       | 0.423464            | 0.330385            | -               |
| <b>Ep2</b>                         | -1376.162366            | -1375.937664                       | 0.423464            | 0.330797            | -               |
| <b>TS<sub>Ep1-Fp</sub></b>         | -1376.151694            | -1375.922525                       | 0.420690            | 0.328209            | -353.5          |
| <b>Fp</b>                          | -1376.159433            | -1375.941719                       | 0.421358            | 0.324619            | -               |
| <b>TS<sub>Fp-Gp</sub></b>          | -1376.160228            | -1375.943823                       | 0.420668            | 0.327414            | -36.8           |
| <b>Gp</b>                          | -1376.196238            | -1375.986110                       | 0.422385            | 0.328914            | -               |
| <b>NTf<sub>2</sub><sup>-</sup></b> | -1827.204122            | -1827.212931                       | 0.068847            | 0.009663            | -               |
| <b>Gp1</b>                         | -3203.559623            | -3203.233546                       | 0.491770            | 0.365108            | -               |
| <b>TS<sub>Gp1-Gp2</sub></b>        | -3203.559506            | -3203.231074                       | 0.488866            | 0.363914            | -282.3          |
| <b>HNTf<sub>2</sub></b>            | -1827.699832            | -1827.639562                       | 0.081470            | 0.020817            | -               |
| <b>Gp2</b>                         | -1375.848894            | -1375.608741                       | 0.410951            | 0.318097            | -               |
| <b>Gp3</b>                         | -3203.610405            | -3203.281211                       | 0.493142            | 0.367471            | -               |
| <b>TS<sub>Gp3-Gp4</sub></b>        | -3203.599111            | -3203.272193                       | 0.489972            | 0.366756            | -739.3          |
| <b>Gp4</b>                         | -1376.268504            | -1376.067014                       | 0.424808            | 0.331801            | -               |
| <b>TS<sub>Gp4-Ap</sub></b>         | -1376.254140            | -1376.047169                       | 0.423795            | 0.332332            | -117.0          |
| <b>PhC≡CCO<sub>2</sub>Me</b>       | -536.272273             | -536.056779                        | 0.165738            | 0.114830            | -               |
| <b>PAp</b>                         | -936.096068             | -935.708470                        | 0.282678            | 0.217933            | -               |
| <b>Fp1</b>                         | -1376.167323            | -1375.943630                       | 0.421597            | 0.325245            | -               |
| <b>TS<sub>Fp1-Ip</sub></b>         | -1376.165148            | -1375.943047                       | 0.420593            | 0.329583            | -62.1           |
| <b>TS<sub>Fp1-Np</sub></b>         | -1376.169303            | -1375.939841                       | 0.420699            | 0.327937            | -30.0           |
| <b>Ip</b>                          | -1376.193484            | -1375.979608                       | 0.422283            | 0.331289            | -               |
| <b>TS<sub>Ip-Jp</sub></b>          | -1376.186107            | -1375.975003                       | 0.420179            | 0.329723            | -114.0          |
| <b>Jp</b>                          | -1376.193058            | -1375.983431                       | 0.422151            | 0.329423            | -               |
| <b>TS<sub>Jp-Kp</sub></b>          | -1376.190508            | -1375.981982                       | 0.420516            | 0.329341            | -113.3          |
| <b>Kp</b>                          | -1376.212926            | -1376.004752                       | 0.422710            | 0.328513            | -               |
| <b>Kp1</b>                         | -3203.534792            | -3203.233421                       | 0.493166            | 0.362269            | -               |

|                              |              |              |          |          |        |
|------------------------------|--------------|--------------|----------|----------|--------|
| <b>TS<sub>Kp1-Gp2</sub></b>  | -3203.533980 | -3203.224906 | 0.489250 | 0.361675 | -203.3 |
| <b>TS<sub>Fp-Lp</sub></b>    | -1376.161136 | -1375.938101 | 0.420462 | 0.328024 | -19.3  |
| <b>Lp</b>                    | -1376.203623 | -1375.983572 | 0.423331 | 0.333343 | -      |
| <b>TS<sub>Lp-Ap</sub></b>    | -1376.175656 | -1375.961998 | 0.421248 | 0.331796 | -71.0  |
| <b>PQ'p</b>                  | -936.038276  | -935.650385  | 0.281512 | 0.218309 | -      |
| <b>TS<sub>Ep1-Mp</sub></b>   | -1376.150583 | -1375.925418 | 0.421011 | 0.326642 | -412.2 |
| <b>Mp</b>                    | -1376.165273 | -1375.945061 | 0.421726 | 0.325527 | -      |
| <b>TS<sub>Mp-Np</sub></b>    | -1376.172627 | -1375.946191 | 0.420999 | 0.327832 | -13.0  |
| <b>Np</b>                    | -1376.179515 | -1375.958352 | 0.422316 | 0.325476 | -      |
| <b>TS<sub>Np-Op</sub></b>    | -1376.167420 | -1375.949706 | 0.420989 | 0.328134 | -244.1 |
| <b>Op</b>                    | -1376.173966 | -1375.961167 | 0.422677 | 0.330507 | -      |
| <b>TS<sub>Op-Pp</sub></b>    | -1376.161285 | -1375.945076 | 0.421467 | 0.331022 | -356.9 |
| <b>Pp</b>                    | -1376.171171 | -1375.952380 | 0.422561 | 0.329491 | -      |
| <b>TS<sub>Pp-Qp</sub></b>    | -1376.171138 | -1375.952372 | 0.421595 | 0.331484 | -14.9  |
| <b>Qp</b>                    | -1376.204589 | -1375.973619 | 0.423748 | 0.333612 | -      |
| <b>TS<sub>Qp-Ap</sub></b>    | -1376.180561 | -1375.970052 | 0.422057 | 0.333858 | -19.1  |
| <b>PQp</b>                   | -936.034325  | -935.645623  | 0.281329 | 0.217471 | -      |
| <b>TS<sub>Ep1L-FpL</sub></b> | -2349.437489 | -2348.612214 | 0.978569 | 0.829532 | -384.4 |
| <b>TS<sub>Ep1L-MpL</sub></b> | -2349.436150 | -2348.614853 | 0.979241 | 0.831437 | -426.3 |

<sup>1</sup>The electronic energy calculated by B3LYP-D3 in gas phase. <sup>2</sup>The electronic energies calculated by M06 in dichloroethane. <sup>3</sup>The thermal correction to enthalpy calculated by B3LYP-D3 in gas phase. <sup>4</sup>The thermal correction to Gibbs free energy calculated by B3LYP-D3 in gas phase. <sup>5</sup>The B3LYP-D3 calculated imaginary frequencies for the transition states in gas phase.



**Table S2. B3LYP-D3 electronic energies in gas phase, M06 electronic energies in trifluoromethylbenzene, thermal correction to enthalpies, thermal correction to Gibbs free energies and B3LYP-D3 calculated imaginary frequencies.**

| Geometry                           | $E_{\text{B3LYP-D3}}^1$ | $E_{\text{B3LYP-D3}}^{\text{(trifluoromethylbenzene)}}$ | Correction of $H^3$ | Correction of $G^4$ | IF <sup>5</sup> |
|------------------------------------|-------------------------|---------------------------------------------------------|---------------------|---------------------|-----------------|
| <b>Ay</b>                          | -1431.137816            | -1431.062971                                            | 0.350729            | 0.264301            | -               |
| <b>anthranil</b>                   | -399.664692             | -399.492110                                             | 0.112155            | 0.075194            | -               |
| <b>TS<sub>Ay-Ey1</sub></b>         | -1830.823251            | -1830.555509                                            | 0.464193            | 0.364594            | -229.0          |
| <b>TS<sub>Ay-Ey2</sub></b>         | -1830.805767            | -1830.538697                                            | 0.463937            | 0.362541            | -168.5          |
| <b>Ey1</b>                         | -1830.850506            | -1830.582200                                            | 0.466507            | 0.369244            | -               |
| <b>Ey2</b>                         | -1830.847020            | -1830.577895                                            | 0.466516            | 0.369702            | -               |
| <b>TS<sub>Ey1-Fy1</sub></b>        | -1830.844993            | -1830.571279                                            | 0.464225            | 0.366903            | -404.2          |
| <b>TS<sub>Ey1-My1</sub></b>        | -1830.840769            | -1830.568904                                            | 0.464386            | 0.367859            | -436.6          |
| <b>Fy1</b>                         | -1830.883942            | -1830.619450                                            | 0.465855            | 0.366562            | -               |
| <b>My1</b>                         | -1830.884555            | -1830.617012                                            | 0.465808            | 0.365732            | -               |
| <b>TS<sub>Fy1-Gy</sub></b>         | -1830.859381            | -1830.601665                                            | 0.463881            | 0.367339            | -337.4          |
| <b>Gy</b>                          | -1830.886989            | -1830.635779                                            | 0.465581            | 0.368170            | -               |
| <b>NTf<sub>2</sub><sup>-</sup></b> | -1827.204122            | -1827.214416                                            | 0.068847            | 0.009663            | -               |
| <b>Gy1</b>                         | -3658.243208            | -3657.877893                                            | 0.535569            | 0.405563            | -               |
| <b>TS<sub>Gy1-Gy2</sub></b>        | -3658.242540            | -3657.872826                                            | 0.532045            | 0.403479            | -543.3          |
| <b>HNTf<sub>2</sub></b>            | -1827.699832            | -1827.642151                                            | 0.081470            | 0.020817            | -               |
| <b>Gy2</b>                         | -1830.529669            | -1830.243463                                            | 0.454107            | 0.357549            | -               |
| <b>Gy3</b>                         | -3658.266089            | -3657.909305                                            | 0.536862            | 0.405308            | -               |
| <b>TS<sub>Gy3-Gy4</sub></b>        | -3658.274019            | -3657.905985                                            | 0.533162            | 0.405845            | -630.4          |
| <b>Gy4</b>                         | -1830.942381            | -1830.701042                                            | 0.467557            | 0.366924            | -               |
| <b>TS<sub>Gy4-Ay</sub></b>         | -1830.934794            | -1830.688524                                            | 0.466491            | 0.370539            | -72.3           |
| <b>PhC≡CNMeMs</b>                  | -990.945485             | -990.701103                                             | 0.208962            | 0.150363            | -               |
| <b>PAy</b>                         | -1390.777448            | -1390.350938                                            | 0.325909            | 0.254820            | -               |
| <b>Fy2</b>                         | -1830.881354            | -1830.616154                                            | 0.465776            | 0.367053            | -               |
| <b>TS<sub>Fy2-Iy</sub></b>         | -1830.862224            | -1830.603002                                            | 0.463935            | 0.368390            | -292.9          |
| <b>Iy</b>                          | -1830.880473            | -1830.626625                                            | 0.465494            | 0.370424            | -               |
| <b>TS<sub>Iy-Jy</sub></b>          | -1830.872154            | -1830.616339                                            | 0.463559            | 0.368787            | -107.2          |
| <b>Jy</b>                          | -1830.865778            | -1830.622927                                            | 0.465555            | 0.366603            | -               |
| <b>TS<sub>Jy-Ky</sub></b>          | -1830.870780            | -1830.618415                                            | 0.463883            | 0.367982            | -66.4           |

|                             |              |              |          |          |        |
|-----------------------------|--------------|--------------|----------|----------|--------|
| <b>Ky</b>                   | -1830.895003 | -1830.643525 | 0.466106 | 0.366700 | -      |
| <b>Ky1</b>                  | -3658.233300 | -3657.883485 | 0.536862 | 0.400450 | -      |
| <b>TS<sub>Ky1-Gy2</sub></b> | -3658.228417 | -3657.871145 | 0.531710 | 0.397712 | -824.4 |
| <b>TS<sub>Fy1-Ly</sub></b>  | -1830.852058 | -1830.593215 | 0.464213 | 0.367492 | -89.8  |
| <b>Ly</b>                   | -1830.873919 | -1830.618517 | 0.466310 | 0.369428 | -      |
| <b>TS<sub>Ly1-Ly1</sub></b> | -1830.865055 | -1830.601306 | 0.464626 | 0.372212 | -62.0  |
| <b>Ly1</b>                  | -1830.900325 | -1830.631268 | 0.467190 | 0.373007 | -      |
| <b>TS<sub>Ly1-Ay</sub></b>  | -1830.880354 | -1830.624471 | 0.465340 | 0.371372 | -36.3  |
| <b>PQ'y</b>                 | -1390.724051 | -1390.298196 | 0.324865 | 0.256118 | -      |
| <b>TS<sub>My1-Oy</sub></b>  | -1830.857471 | -1830.598972 | 0.464041 | 0.366862 | -262.6 |
| <b>Oy</b>                   | -1830.859216 | -1830.605842 | 0.465624 | 0.369518 | -      |
| <b>TS<sub>Oy-Qy</sub></b>   | -1830.839454 | -1830.581144 | 0.464710 | 0.371737 | -373.8 |
| <b>Qy</b>                   | -1830.895596 | -1830.630745 | 0.466903 | 0.371928 | -      |
| <b>TS<sub>Qy-Ay</sub></b>   | -1830.865245 | -1830.611328 | 0.465151 | 0.372343 | -51.9  |
| <b>PQy</b>                  | -1390.719283 | -1390.291061 | 0.324915 | 0.256383 | -      |
| <b>TS<sub>My1-Fy3</sub></b> | -1830.878837 | -1830.609140 | 0.464345 | 0.366123 | -76.9  |
| <b>Fy3</b>                  | -1830.890677 | -1830.621956 | 0.465811 | 0.368024 | -      |

<sup>1</sup>The electronic energy calculated by B3LYP-D3 in gas phase. <sup>2</sup>The electronic energies calculated by M06 in trifluoromethylbenzene. <sup>3</sup>The thermal correction to enthalpy calculated by B3LYP-D3 in gas phase. <sup>4</sup>The thermal correction to Gibbs free energy calculated by B3LYP-D3 in gas phase. <sup>5</sup>The B3LYP-D3 calculated imaginary frequencies for the transition states in gas phase.

**Table S3. Comparison of the relative free energies calculated for the gold-catalyzed reaction of anthranil with the propiolate (PhC≡CCO<sub>2</sub>Me) using M06 and B3LYP-D3 methods.**

| Geometry                    | M06   | B3D3  |
|-----------------------------|-------|-------|
| <b>Ap</b>                   | 0.0   | 0.0   |
| <b>TS<sub>Ap-Ep1</sub></b>  | 13.5  | 12.4  |
| <b>TS<sub>Ap-Ep2</sub></b>  | 19.7  | 19.7  |
| <b>Ep1</b>                  | -3.1  | -4.6  |
| <b>Ep2</b>                  | -2.7  | -3.5  |
| <b>TS<sub>Ep1-Fp</sub></b>  | 5.2   | 0.9   |
| <b>Fp</b>                   | -9.1  | -11.9 |
| <b>TS<sub>Fp-Gp</sub></b>   | -8.7  | -11.0 |
| <b>Gp</b>                   | -34.3 | -31.1 |
| <b>Gp1</b>                  | -39.3 | -41.4 |
| <b>TS<sub>Gp1-Gp2</sub></b> | -38.5 | -41.3 |
| <b>Gp2</b>                  | -65.0 | -61.4 |
| <b>Gp3</b>                  | -67.7 | -68.9 |
| <b>TS<sub>Gp3-Gp4</sub></b> | -62.5 | -63.6 |
| <b>Gp4</b>                  | -83.2 | -81.0 |
| <b>TS<sub>Gp4-Ap</sub></b>  | -70.5 | -68.0 |
| <b>Fp1</b>                  | -9.9  | -12.5 |
| <b>TS<sub>Fp1-Ip</sub></b>  | -6.8  | -8.8  |
| <b>TS<sub>Fp1-Np</sub></b>  | -5.9  | -8.6  |
| <b>Ip</b>                   | -28.7 | -25.7 |
| <b>TS<sub>Ip-Jp</sub></b>   | -26.8 | -24.8 |
| <b>Jp</b>                   | -32.3 | -28.8 |
| <b>TS<sub>Jp-Kp</sub></b>   | -31.4 | -28.4 |
| <b>Kp</b>                   | -46.2 | -42.7 |
| <b>Kp1</b>                  | -41.0 | -39.4 |
| <b>TS<sub>Kp1-Gp2</sub></b> | -36.0 | -35.7 |
| <b>TS<sub>Fp-Lp</sub></b>   | -4.7  | -7.2  |
| <b>Lp</b>                   | -29.9 | -28.7 |
| <b>TS<sub>Lp-Ap</sub></b>   | -17.3 | -13.7 |

---

|                              |       |       |
|------------------------------|-------|-------|
| <b>TS<sub>Ep1-Mp</sub></b>   | 2.4   | -1.9  |
| <b>Mp</b>                    | -10.7 | -13.8 |
| <b>TS<sub>Mp-Np</sub></b>    | -9.9  | -12.1 |
| <b>Np</b>                    | -19.0 | -17.4 |
| <b>TS<sub>Np-Op</sub></b>    | -11.9 | -10.1 |
| <b>Op</b>                    | -17.6 | -12.8 |
| <b>TS<sub>Op-Pp</sub></b>    | -7.2  | -4.8  |
| <b>Pp</b>                    | -12.8 | -11.8 |
| <b>TS<sub>Pp-Qp</sub></b>    | -11.5 | -10.6 |
| <b>Qp</b>                    | -23.5 | -24.7 |
| <b>TS<sub>Qp-Ap</sub></b>    | -21.1 | -15.1 |
| <b>TS<sub>Ep1L-FpL</sub></b> | 0.0   | 0.0   |
| <b>TS<sub>Ep1L-MpL</sub></b> | -0.5  | -0.3  |

---

**Table S4. Comparison of the relative free energies calculated for the gold-catalyzed reaction of anthranil with the ynamide (PhC≡CNMeMs) using M06 and B3LYP-D3 methods.**

| Geometry                    | M06   | B3D3  |
|-----------------------------|-------|-------|
| <b>Ay</b>                   | 0.0   | 0.0   |
| <b>TS<sub>Ay-Ey1</sub></b>  | 15.5  | 14.6  |
| <b>TS<sub>Ay-Ey2</sub></b>  | 24.7  | 23.2  |
| <b>Ey1</b>                  | 1.7   | 0.4   |
| <b>Ey2</b>                  | 4.6   | 2.0   |
| <b>TS<sub>Ey1-Fy1</sub></b> | 7.0   | 3.1   |
| <b>TS<sub>Ey1-My1</sub></b> | 9.1   | 5.2   |
| <b>Fy1</b>                  | -23.4 | -25.8 |
| <b>My1</b>                  | -22.4 | -24.4 |
| <b>TS<sub>Fy1-Gy</sub></b>  | -11.8 | -10.8 |
| <b>Gy</b>                   | -32.6 | -28.7 |
| <b>Gy1</b>                  | -32.6 | -33.8 |
| <b>TS<sub>Gy1-Gy2</sub></b> | -30.8 | -33.1 |
| <b>Gy2</b>                  | -54.5 | -50.0 |
| <b>Gy3</b>                  | -52.5 | -50.5 |
| <b>TS<sub>Gy3-Gy4</sub></b> | -50.1 | -51.3 |
| <b>Gy4</b>                  | -74.4 | -70.5 |
| <b>TS<sub>Gy4-Ay</sub></b>  | -64.3 | -62.5 |
| <b>Fy2</b>                  | -21.0 | -22.7 |
| <b>TS<sub>Fy2-Iy</sub></b>  | -11.9 | -10.4 |
| <b>Iy</b>                   | -25.5 | -21.2 |
| <b>TS<sub>Iy-Jy</sub></b>   | -20.1 | -16.6 |
| <b>Jy</b>                   | -25.6 | -20.8 |
| <b>TS<sub>Jy-Ky</sub></b>   | -21.9 | -17.4 |
| <b>Ky</b>                   | -38.4 | -34.9 |
| <b>Ky1</b>                  | -39.3 | -37.6 |
| <b>TS<sub>Ky1-Gy2</sub></b> | -33.3 | -31.9 |
| <b>TS<sub>Fy2-Ly</sub></b>  | -6.4  | -7.1  |
| <b>Ly</b>                   | -21.0 | -19.1 |

---

|                             |       |       |
|-----------------------------|-------|-------|
| <b>TS<sub>Ly-Ly1</sub></b>  | -8.5  | -7.8  |
| <b>Ly1</b>                  | -26.8 | -28.0 |
| <b>TS<sub>Ly1-Ay</sub></b>  | -23.5 | -17.4 |
| <b>TS<sub>My1-Oy</sub></b>  | -10.4 | -6.9  |
| <b>Oy</b>                   | -13.0 | -7.6  |
| <b>TS<sub>Oy-Qy</sub></b>   | 3.9   | 7.4   |
| <b>Qy</b>                   | -27.1 | -27.3 |
| <b>TS<sub>Qy-Ay</sub></b>   | -14.7 | -9.5  |
| <b>TS<sub>My1-Fy3</sub></b> | -17.2 | -18.9 |
| <b>Fy3</b>                  | -24.1 | -26.1 |

---

### B3LYP-D3 geometries for all the optimized compounds and transition states

**Ap**  $E_{M06(dichloroethane)} = -976.409896$

|    |             |             |             |
|----|-------------|-------------|-------------|
| C  | -3.98080500 | 4.55235000  | 5.95531800  |
| C  | -3.69770500 | 4.43198200  | 7.16639000  |
| C  | -3.10327200 | 5.16160800  | 8.31689100  |
| O  | -3.20862600 | 6.35402900  | 8.46347200  |
| O  | -2.46640800 | 4.31605000  | 9.13603700  |
| C  | -1.83307000 | 4.93587800  | 10.28307500 |
| C  | -4.89540200 | 0.45578200  | 7.70977100  |
| C  | -4.81637900 | -1.74627500 | 8.17368900  |
| C  | -6.12380800 | -1.37650300 | 8.16133600  |
| H  | -4.35260800 | -2.70242700 | 8.36088300  |
| H  | -7.02299100 | -1.94981200 | 8.32581000  |
| C  | -2.61361400 | -0.59252500 | 7.85667300  |
| C  | -7.38895300 | 0.74945500  | 7.72739300  |
| N  | -6.15411700 | -0.02216400 | 7.88117800  |
| N  | -4.07685600 | -0.61073200 | 7.89447100  |
| Au | -4.35412500 | 2.37492600  | 7.29539800  |
| H  | -7.18621400 | 1.79950700  | 7.93911200  |
| H  | -7.77260300 | 0.64778500  | 6.70858000  |
| H  | -8.13000300 | 0.37800500  | 8.43780000  |
| H  | -2.21488800 | -0.76473200 | 8.85978300  |
| H  | -2.25842500 | -1.37334300 | 7.18000100  |
| H  | -2.27745100 | 0.37926600  | 7.49576900  |
| H  | -1.37064100 | 4.11653700  | 10.83135200 |
| H  | -1.08247300 | 5.65741300  | 9.95220200  |
| H  | -2.58281000 | 5.44368200  | 10.89441000 |
| C  | -4.32765400 | 4.67254900  | 4.59593500  |
| C  | -3.48698600 | 4.13094700  | 3.59539200  |
| C  | -5.50507300 | 5.37043600  | 4.23757300  |
| C  | -3.82567700 | 4.28940600  | 2.25828700  |
| H  | -2.58597600 | 3.59940200  | 3.88440100  |
| C  | -5.82683400 | 5.52330300  | 2.89489900  |
| H  | -6.13755500 | 5.78660500  | 5.01503600  |
| C  | -4.99137100 | 4.98358500  | 1.90924000  |
| H  | -3.18469800 | 3.87851800  | 1.48481500  |
| H  | -6.72482900 | 6.06312700  | 2.61196000  |
| H  | -5.24868300 | 5.10680600  | 0.86133000  |

**anthranil**  $E_{M06(dichloroethane)} = -399.494410$

|   |             |             |             |
|---|-------------|-------------|-------------|
| C | -3.43000300 | 0.39383400  | 0.00005400  |
| C | -1.98788800 | 0.43195800  | -0.00002700 |
| C | -1.29555800 | 1.67785300  | 0.00004400  |
| C | -2.04488900 | 2.82410600  | 0.00017800  |
| C | -3.48304600 | 2.78528300  | 0.00025300  |
| C | -4.18240400 | 1.60824200  | 0.00019800  |
| C | -1.64756700 | -0.90010100 | -0.00020500 |
| H | -0.21021600 | 1.71071200  | -0.00002800 |
| H | -1.55212700 | 3.79204400  | 0.00022200  |
| H | -4.02357300 | 3.72794100  | 0.00036700  |
| H | -5.26673600 | 1.57716100  | 0.00027200  |
| H | -0.71026300 | -1.43808900 | -0.00034100 |
| N | -3.89916100 | -0.84981100 | 0.00003500  |
| O | -2.75633300 | -1.64997700 | -0.00013500 |

**TS<sub>Ap-Ep1</sub>**  $E_{M06(dichloroethane)} = -1375.905286$

|   |             |            |            |
|---|-------------|------------|------------|
| C | -3.45753800 | 3.71435800 | 5.65624100 |
| C | -3.01862200 | 3.19499400 | 6.73454400 |
| C | -1.80204500 | 3.53753600 | 7.51969900 |
| O | -1.61285300 | 4.61055900 | 8.04725400 |
| O | -0.97540000 | 2.48609500 | 7.59587000 |
| C | 0.25298000  | 2.72345700 | 8.32173900 |
| C | -2.36192300 | 6.52804700 | 5.24486600 |

|    |             |             |             |
|----|-------------|-------------|-------------|
| C  | -2.45860700 | 7.21456000  | 3.98656600  |
| C  | -2.89597900 | 8.56749200  | 3.92686500  |
| C  | -3.23610100 | 9.17273300  | 5.10935600  |
| C  | -3.14822600 | 8.47677900  | 6.36148800  |
| C  | -2.71981600 | 7.17461300  | 6.45841600  |
| C  | -2.06283100 | 6.25880200  | 3.07332500  |
| H  | -2.95409500 | 9.09291100  | 2.97927200  |
| H  | -3.57508400 | 10.20392600 | 5.11070600  |
| H  | -3.42641800 | 9.01025500  | 7.26589800  |
| H  | -2.63424800 | 6.64387100  | 7.39925400  |
| H  | -1.93847900 | 6.25608000  | 1.99924000  |
| N  | -1.93309900 | 5.26626400  | 5.07959000  |
| O  | -1.75800600 | 5.12249700  | 3.69846200  |
| C  | -5.29890000 | 0.04207300  | 8.16809900  |
| C  | -5.84154600 | -1.85951200 | 9.25336200  |
| C  | -6.97621000 | -1.37482700 | 8.68615300  |
| H  | -5.67062400 | -2.73712200 | 9.85735400  |
| H  | -7.98702600 | -1.75224600 | 8.68929600  |
| C  | -3.44478100 | -1.12772100 | 9.39147000  |
| C  | -7.56520500 | 0.59277800  | 7.24377000  |
| N  | -6.62598100 | -0.20783400 | 8.02785200  |
| N  | -4.82342100 | -0.98096000 | 8.92361000  |
| Au | -4.22579000 | 1.61474700  | 7.41963200  |
| H  | -7.13249900 | 1.57759400  | 7.06717600  |
| H  | -7.76620500 | 0.10608000  | 6.28521500  |
| H  | -8.49762400 | 0.70361100  | 7.80205600  |
| H  | -3.37366400 | -0.84257800 | 10.44481100 |
| H  | -3.13252300 | -2.16749400 | 9.27020000  |
| H  | -2.79471000 | -0.48544700 | 8.79679500  |
| H  | 0.80253600  | 1.78427500  | 8.27094300  |
| H  | 0.81922100  | 3.53032200  | 7.85053800  |
| H  | 0.03209800  | 2.99306400  | 9.35777600  |
| C  | -4.34137500 | 3.93017900  | 4.56546600  |
| C  | -4.24530100 | 3.13240800  | 3.40541900  |
| C  | -5.30436700 | 4.96064600  | 4.63555000  |
| C  | -5.12401100 | 3.34399100  | 2.34831500  |
| H  | -3.48651200 | 2.35834800  | 3.35638200  |
| C  | -6.17449300 | 5.16501300  | 3.57020300  |
| H  | -5.35160900 | 5.58413200  | 5.52262200  |
| C  | -6.08733300 | 4.35638600  | 2.43087700  |
| H  | -5.05942000 | 2.72482500  | 1.45885500  |
| H  | -6.91998300 | 5.95240700  | 3.62392100  |
| H  | -6.77050900 | 4.51835500  | 1.60204000  |

**TS<sub>Ap-Ep2</sub>**  $E_{M06(dichloroethane)} = -1375.895991$

|   |             |            |             |
|---|-------------|------------|-------------|
| C | -2.92403500 | 4.92651100 | 5.27705300  |
| C | -3.33386100 | 4.73687300 | 6.45697800  |
| C | -4.25559500 | 4.81463900 | 7.59278600  |
| O | -5.46393200 | 4.82440700 | 7.43892900  |
| O | -3.63080700 | 4.91386200 | 8.76281900  |
| C | -4.49519200 | 4.96945800 | 9.92392500  |
| C | -0.62939800 | 3.54236500 | 8.10578700  |
| C | 0.41517400  | 2.67484700 | 7.62522500  |
| C | 1.71989900  | 2.72528600 | 8.19501900  |
| C | 1.93990300  | 3.63219200 | 9.19798000  |
| C | 0.89717100  | 4.50304500 | 9.66576100  |
| C | -0.37304000 | 4.47797800 | 9.14852800  |
| C | -0.20190500 | 1.96178700 | 6.62154800  |
| H | 2.50576500  | 2.06561100 | 7.84163600  |
| H | 2.92041500  | 3.70324700 | 9.65804300  |
| H | 1.13256000  | 5.20461400 | 10.46094600 |
| H | -1.16079500 | 5.13481500 | 9.49715400  |
| H | 0.12130500  | 1.18430100 | 5.94409500  |
| N | -1.76801800 | 3.33482300 | 7.44157800  |
| O | -1.47416300 | 2.34887700 | 6.50209600  |

|            |                                          |             |             |            |                                          |             |             |
|------------|------------------------------------------|-------------|-------------|------------|------------------------------------------|-------------|-------------|
| C          | -6.48014200                              | 6.41994000  | 3.59252000  | H          | -3.52447200                              | -0.40308700 | 10.58780900 |
| C          | -7.91598900                              | 7.45220500  | 2.19871900  | H          | -2.89705800                              | -1.56048800 | 9.37986800  |
| C          | -8.64917500                              | 6.84369400  | 3.16725900  | H          | -2.74485000                              | 0.19210500  | 9.09935100  |
| H          | -8.21651100                              | 8.05029900  | 1.35247100  | H          | 0.92710100                               | 2.22597800  | 7.85968400  |
| H          | -9.71559300                              | 6.79958700  | 3.32537500  | H          | 0.92758000                               | 3.95294200  | 7.36845900  |
| C          | -5.47123300                              | 7.70113900  | 1.68442100  | H          | 0.15980600                               | 3.47403700  | 8.90155500  |
| C          | -8.15581300                              | 5.40054500  | 5.16540500  | C          | -4.54169900                              | 3.95346500  | 4.40586900  |
| N          | -7.75323400                              | 6.21701300  | 4.01571600  | C          | -4.76825600                              | 2.65668400  | 3.91651500  |
| N          | -6.58671500                              | 7.17963200  | 2.47377700  | C          | -5.43477600                              | 4.97861100  | 4.05316800  |
| Au         | -4.79570000                              | 5.71149000  | 4.48350000  | C          | -5.88545200                              | 2.38506000  | 3.12580400  |
| H          | -7.31346900                              | 5.28336100  | 5.84765100  | H          | -4.05375800                              | 1.87203200  | 4.14439300  |
| H          | -8.97482000                              | 5.90266000  | 5.68502400  | C          | -6.55077300                              | 4.70486700  | 3.26396400  |
| H          | -8.48738800                              | 4.41650200  | 4.82271600  | H          | -5.27157800                              | 5.99002200  | 4.41755300  |
| H          | -5.67327500                              | 7.53998800  | 0.62294300  | C          | -6.78206100                              | 3.40627400  | 2.80185100  |
| H          | -5.34276700                              | 8.76982900  | 1.87675600  | H          | -6.04299000                              | 1.37957200  | 2.74559700  |
| H          | -4.56009000                              | 7.17132400  | 1.96289900  | H          | -7.24218100                              | 5.50386800  | 3.01236400  |
| H          | -5.13477200                              | 5.85367600  | 9.87439300  | H          | -7.64840500                              | 3.19588400  | 2.18153100  |
| H          | -5.11316000                              | 4.07003000  | 9.97237400  |            |                                          |             |             |
| H          | -3.81979600                              | 5.02289300  | 10.77641000 | <b>Ep2</b> | $E_{M06(dichloroethane)} = -1375.937664$ |             |             |
| C          | -1.74425900                              | 4.79154300  | 4.44264200  | C          | -2.92985600                              | 4.71945400  | 5.65742300  |
| C          | -0.47734800                              | 5.04378100  | 5.00198400  | C          | -3.04041600                              | 4.01550300  | 6.81908700  |
| C          | -1.84512000                              | 4.40336900  | 3.09532600  | C          | -4.20984700                              | 3.81840900  | 7.71952000  |
| C          | 0.66753700                               | 4.88616600  | 4.22630100  | O          | -4.11982600                              | 3.23941200  | 8.78883000  |
| H          | -0.40324800                              | 5.36148500  | 6.03563000  | O          | -5.34945500                              | 4.36471600  | 7.26877900  |
| C          | -0.69287400                              | 4.23503300  | 2.33080200  | C          | -6.47626200                              | 4.24703300  | 8.16196300  |
| H          | -2.82367600                              | 4.21163900  | 2.66500000  | C          | -1.15644000                              | 3.36776300  | 8.43470200  |
| C          | 0.56370800                               | 4.47699300  | 2.89298600  | C          | -0.11839400                              | 2.38534600  | 8.34144300  |
| H          | 1.64203800                               | 5.08256400  | 4.66346500  | C          | 0.84545500                               | 2.25710400  | 9.38146700  |
| H          | -0.77498100                              | 3.91821500  | 1.29544900  | C          | 0.73381600                               | 3.10727900  | 10.45052000 |
| H          | 1.45975000                               | 4.35326400  | 2.29188800  | C          | -0.31293300                              | 4.08505400  | 10.52427500 |
|            |                                          |             |             | C          | -1.26378300                              | 4.23688900  | 9.54199300  |
|            |                                          |             |             | C          | -0.34012500                              | 1.76560200  | 7.12841400  |
| <b>Ep1</b> | $E_{M06(dichloroethane)} = -1375.937861$ |             |             | H          | 1.63091300                               | 1.51184900  | 9.31974300  |
| C          | -3.37505900                              | 4.23733700  | 5.27977700  | H          | 1.44453100                               | 3.04540500  | 11.26786600 |
| C          | -2.95322500                              | 3.52078000  | 6.34563800  | H          | -0.35684300                              | 4.72574300  | 11.39981100 |
| C          | -1.70667600                              | 3.92525500  | 7.05722200  | H          | -2.07114800                              | 4.95417700  | 9.61039600  |
| O          | -1.47305700                              | 5.03168500  | 7.51336300  | H          | 0.16314000                               | 0.97643100  | 6.58722800  |
| O          | -0.86231400                              | 2.88402300  | 7.17691400  | H          | -1.90145100                              | 3.30073200  | 7.32331100  |
| C          | 0.36855700                               | 3.16145400  | 7.87479000  | O          | -1.40604300                              | 2.27801700  | 6.52053200  |
| C          | -2.63971900                              | 6.69312800  | 5.36908300  | C          | -5.99255900                              | 6.60350300  | 3.64600500  |
| C          | -1.98193800                              | 7.52448800  | 4.40458000  | C          | -8.03587700                              | 7.18492500  | 2.87137100  |
| C          | -1.81225100                              | 8.91721700  | 4.65075900  | C          | -7.12611500                              | 7.99808800  | 2.27509300  |
| C          | -2.31969000                              | 9.41286200  | 5.82272800  | H          | -9.10894300                              | 7.12962000  | 2.77222400  |
| C          | -2.98930400                              | 8.56590700  | 6.76765400  | H          | -7.25144800                              | 8.79645900  | 1.56009300  |
| C          | -3.16021800                              | 7.21540700  | 6.57244500  | C          | -7.94398100                              | 5.28749700  | 4.50965400  |
| C          | -1.67398300                              | 6.67157500  | 3.36509800  | C          | -4.63605200                              | 8.29234700  | 2.38416900  |
| H          | -1.30393100                              | 9.54877400  | 3.93047900  | N          | -5.88270400                              | 7.62586700  | 2.75742200  |
| H          | -2.21695500                              | 10.46802700 | 6.05334600  | N          | -7.32504700                              | 6.33957000  | 3.70669900  |
| H          | -3.36796700                              | 9.01441600  | 7.68103500  | Au         | -4.48005900                              | 5.65672300  | 4.68415000  |
| H          | -3.62738900                              | 6.56523600  | 7.29924000  | H          | -3.79621100                              | 7.66620900  | 2.68557100  |
| H          | -1.18198300                              | 6.80466000  | 2.41106600  | H          | -4.61214200                              | 8.43446000  | 1.30101900  |
| N          | -2.66774400                              | 5.43491300  | 4.89604000  | H          | -4.56336600                              | 9.26286900  | 2.88315700  |
| O          | -2.07999300                              | 5.43176900  | 3.62535800  | H          | -8.72185400                              | 5.72021900  | 5.14491000  |
| C          | -5.04343200                              | 0.32096200  | 7.88113300  | H          | -8.38673200                              | 4.53026400  | 3.85643700  |
| C          | -5.67745500                              | -1.48888800 | 9.07680200  | H          | -7.17879700                              | 4.82404500  | 5.13265100  |
| C          | -6.70905800                              | -1.15958800 | 8.25708200  | H          | -6.73849300                              | 3.19618700  | 8.30781200  |
| H          | -5.57042900                              | -2.28676400 | 9.79530800  | H          | -6.24424000                              | 4.69708300  | 9.13016900  |
| H          | -7.68034900                              | -1.61077500 | 8.12582700  | H          | -7.28760800                              | 4.78529600  | 7.67229000  |
| C          | -3.37824100                              | -0.58887300 | 9.52015500  | C          | -1.59337100                              | 4.84142400  | 5.02278200  |
| C          | -7.15160200                              | 0.64636900  | 6.56608000  | C          | -0.49835800                              | 5.37082000  | 5.73094200  |
| N          | -6.30230800                              | -0.05387000 | 7.52947600  | C          | -1.40466700                              | 4.45211900  | 3.68513400  |
| N          | -4.66756400                              | -0.57333400 | 8.83208000  | C          | 0.74917800                               | 5.49764200  | 5.12027000  |
| Au         | -3.97826100                              | 1.91085300  | 7.11791500  | H          | -0.63620700                              | 5.71281500  | 6.75321400  |
| H          | -6.52612300                              | 1.17036900  | 5.84232200  | C          | -0.14843300                              | 4.54896600  | 3.08843700  |
| H          | -7.77379300                              | -0.08370600 | 6.04350400  | H          | -2.24893300                              | 4.06191900  | 3.12365600  |
| H          | -7.79087100                              | 1.36941400  | 7.08066400  |            |                                          |             |             |



|                                                                            |             |             |              |                                                                           |             |             |              |
|----------------------------------------------------------------------------|-------------|-------------|--------------|---------------------------------------------------------------------------|-------------|-------------|--------------|
| C                                                                          | 0.93234400  | 5.07556000  | 3.80125700   | C                                                                         | -2.03739100 | 7.77798200  | -7.47420300  |
| H                                                                          | 1.57791800  | 5.92919600  | 5.67492800   | C                                                                         | -0.99935700 | 7.95627700  | -8.38607900  |
| H                                                                          | -0.01626900 | 4.22585500  | 2.05966200   | C                                                                         | -0.15114000 | 6.89383700  | -8.72101200  |
| H                                                                          | 1.90540700  | 5.16910200  | 3.32798400   | C                                                                         | -0.35141600 | 5.64131300  | -8.13761600  |
| <b>TS<sub>Epi-Fp</sub></b> $E_{M06}(\text{dichloroethane}) = -1375.922525$ |             |             |              | C                                                                         | -1.39026900 | 5.43768700  | -7.22865600  |
| C                                                                          | -4.09567500 | 5.81532600  | -5.98815300  | C                                                                         | -2.99668800 | 8.85276100  | -7.16826300  |
| C                                                                          | -4.46033200 | 5.00891100  | -7.05763800  | H                                                                         | -0.86783100 | 8.92768600  | -8.85600900  |
| C                                                                          | -4.10221400 | 5.39497600  | -8.45295000  | H                                                                         | 0.65330400  | 7.04349900  | -9.43380700  |
| O                                                                          | -3.51051800 | 4.65964500  | -9.21833200  | H                                                                         | 0.30570200  | 4.81353100  | -8.38668200  |
| O                                                                          | -4.53775500 | 6.63009000  | -8.77205200  | H                                                                         | -1.51345600 | 4.48267300  | -6.72684500  |
| C                                                                          | -4.26522400 | 7.04747400  | -10.12814700 | H                                                                         | -2.74285100 | 9.85618000  | -7.56550300  |
| C                                                                          | -2.16363000 | 6.99849900  | -7.03626600  | N                                                                         | -3.20188200 | 6.36427100  | -5.89820300  |
| C                                                                          | -2.03024100 | 8.34939300  | -7.46126000  | O                                                                         | -4.00842900 | 8.67548600  | -6.51487900  |
| C                                                                          | -0.97580700 | 8.75274200  | -8.30804000  | C                                                                         | -5.65310900 | 0.74347100  | -6.39909600  |
| C                                                                          | -0.07462300 | 7.79670400  | -8.72999800  | C                                                                         | -6.29482400 | -1.41195600 | -6.54491100  |
| C                                                                          | -0.21185400 | 6.45145300  | -8.30545400  | C                                                                         | -6.33681000 | -1.05817500 | -5.23059500  |
| C                                                                          | -1.23302900 | 6.03359000  | -7.46728200  | H                                                                         | -6.53110800 | -2.34418100 | -7.03430100  |
| C                                                                          | -3.07089200 | 9.09258400  | -6.86606600  | H                                                                         | -6.60932300 | -1.62729600 | -4.35530200  |
| H                                                                          | -0.89206600 | 9.78904200  | -8.62042800  | C                                                                         | -5.72156200 | -0.25841200 | -8.69752500  |
| H                                                                          | 0.74137200  | 8.06742600  | -9.39122300  | C                                                                         | -5.80482700 | 1.02580900  | -3.91559300  |
| H                                                                          | 0.50570300  | 5.71491600  | -8.65459500  | N                                                                         | -5.94434100 | 0.26337100  | -5.16064500  |
| H                                                                          | -1.33428100 | 5.00060800  | -7.15702400  | N                                                                         | -5.87263000 | -0.29724100 | -7.24288000  |
| H                                                                          | -3.19775100 | 10.17652900 | -6.93036600  | Au                                                                        | -5.02206200 | 2.66266000  | -6.79979000  |
| N                                                                          | -3.16026900 | 6.80382200  | -6.12785100  | H                                                                         | -6.19705400 | 2.03519100  | -4.05113800  |
| O                                                                          | -3.89009500 | 8.44085900  | -6.15446400  | H                                                                         | -4.75233600 | 1.08252400  | -3.62695900  |
| C                                                                          | -6.06641300 | 1.26355000  | -6.61955000  | H                                                                         | -6.37177000 | 0.52178400  | -3.13132300  |
| C                                                                          | -6.76624000 | -0.84442600 | -7.02220000  | H                                                                         | -5.06837600 | -1.07347500 | -9.01864300  |
| C                                                                          | -6.97474400 | -0.58911100 | -5.70366500  | H                                                                         | -5.27636000 | 0.69544600  | -8.98036500  |
| H                                                                          | -6.96524500 | -1.72533500 | -7.61279100  | H                                                                         | -6.69931500 | -0.36001000 | -9.17589100  |
| H                                                                          | -7.38413600 | -1.20679600 | -4.91930100  | H                                                                         | -2.74737100 | 4.24406600  | -11.14397400 |
| C                                                                          | -5.86398100 | 0.44001000  | -8.98048900  | H                                                                         | -2.97012400 | 5.93424000  | -10.58002500 |
| C                                                                          | -6.55964300 | 1.34327100  | -4.15857800  | H                                                                         | -4.39236100 | 4.96592500  | -11.05939800 |
| N                                                                          | -6.54240100 | 0.70523300  | -5.47518800  | C                                                                         | -4.85913100 | 5.17406800  | -4.64994100  |
| N                                                                          | -6.20797100 | 0.29871500  | -7.56559600  | C                                                                         | -4.20706200 | 5.22588500  | -3.40953000  |
| Au                                                                         | -5.28911900 | 3.15706200  | -6.85240100  | C                                                                         | -6.24138200 | 4.92508400  | -4.69440300  |
| H                                                                          | -6.34974200 | 2.40745600  | -4.26835500  | C                                                                         | -4.91955500 | 4.99486600  | -2.23349800  |
| H                                                                          | -5.80063800 | 0.89073400  | -3.51432100  | H                                                                         | -3.14421400 | 5.44441400  | -3.37606900  |
| H                                                                          | -7.54660400 | 1.21455800  | -3.70715200  | C                                                                         | -6.95466600 | 4.71069200  | -3.51649300  |
| H                                                                          | -5.28962900 | -0.43199500 | -9.30242600  | H                                                                         | -6.76194300 | 4.93419400  | -5.64810900  |
| H                                                                          | -5.25972500 | 1.33787400  | -9.11185200  | C                                                                         | -6.29217100 | 4.73392800  | -2.28374400  |
| H                                                                          | -6.77435300 | 0.52222800  | -9.58078500  | H                                                                         | -4.40617300 | 5.02796000  | -1.27711500  |
| H                                                                          | -4.76292200 | 8.01015400  | -10.24119200 | H                                                                         | -8.02696500 | 4.54272400  | -3.55589200  |
| H                                                                          | -4.66218600 | 6.31861700  | -10.83847500 | H                                                                         | -6.84684800 | 4.56638000  | -1.36498400  |
| H                                                                          | -3.18626200 | 7.14559300  | -10.27762600 | <b>TS<sub>Fp-Gp</sub></b> $E_{M06}(\text{dichloroethane}) = -1375.943823$ |             |             |              |
| C                                                                          | -4.61759300 | 5.64578800  | -4.60805400  | C                                                                         | -3.97097000 | 5.43493400  | -5.93243000  |
| C                                                                          | -3.76467500 | 5.76847600  | -3.50083300  | C                                                                         | -4.25989500 | 4.60220400  | -7.14426800  |
| C                                                                          | -5.97995600 | 5.37791000  | -4.39539700  | C                                                                         | -4.73312100 | 5.33605700  | -8.34267000  |
| C                                                                          | -4.25659000 | 5.59105800  | -2.20868900  | O                                                                         | -5.81482900 | 5.88250900  | -8.20737900  |
| H                                                                          | -2.71372800 | 5.99317300  | -3.65717900  | O                                                                         | -4.01743300 | 5.27044000  | -9.45482400  |
| C                                                                          | -6.47174900 | 5.20732200  | -3.10124100  | C                                                                         | -4.58703600 | 5.95612500  | -10.60038200 |
| H                                                                          | -6.65448000 | 5.32720800  | -5.24508900  | C                                                                         | -2.12313700 | 6.00918300  | -7.03056700  |
| C                                                                          | -5.60974600 | 5.30580700  | -2.00575000  | C                                                                         | -1.61608800 | 7.08457200  | -7.80954400  |
| H                                                                          | -3.58466000 | 5.67589100  | -1.35968800  | C                                                                         | -0.89224700 | 6.78728000  | -8.96049100  |
| H                                                                          | -7.53038500 | 5.01747900  | -2.94784200  | C                                                                         | -0.64776000 | 5.46148500  | -9.36948300  |
| H                                                                          | -5.99283100 | 5.17587500  | -0.99769600  | C                                                                         | -1.10285800 | 4.40912900  | -8.59313300  |
| <b>Fp</b> $E_{M06}(\text{dichloroethane}) = -1375.941719$                  |             |             |              | C                                                                         | -1.82549700 | 4.67192700  | -7.41417100  |
| C                                                                          | -4.09090800 | 5.40109200  | -5.90370900  | C                                                                         | -1.93293500 | 8.50514800  | -7.49739700  |
| C                                                                          | -4.33662700 | 4.53800200  | -7.04635300  | H                                                                         | -0.52892300 | 7.60865100  | -9.57449500  |
| C                                                                          | -4.23268800 | 5.10220800  | -8.41453500  | H                                                                         | -0.08064400 | 5.27375300  | -10.27563100 |
| O                                                                          | -4.92032900 | 6.06613100  | -8.69675300  | H                                                                         | -0.88395400 | 3.38212500  | -8.86847000  |
| O                                                                          | -3.48317100 | 4.39730800  | -9.26029600  | H                                                                         | -1.96879100 | 3.87824200  | -6.68884400  |
| C                                                                          | -3.39966900 | 4.92958100  | -10.60520400 | H                                                                         | -1.33415600 | 9.23853200  | -8.08024300  |
| C                                                                          | -2.24859900 | 6.50085800  | -6.88221800  | N                                                                         | -2.93440600 | 6.21437400  | -5.93122500  |
|                                                                            |             |             |              | O                                                                         | -2.77136200 | 8.86630000  | -6.70115300  |

|                                                           |             |             |              |                                                                                    |             |             |              |
|-----------------------------------------------------------|-------------|-------------|--------------|------------------------------------------------------------------------------------|-------------|-------------|--------------|
| C                                                         | -5.47690500 | 0.75973600  | -6.48258600  | H                                                                                  | 0.69275300  | 0.90677400  | -13.67254000 |
| C                                                         | -6.16980300 | -1.38277900 | -6.57731900  | H                                                                                  | 0.15885600  | 0.55836200  | -12.00819800 |
| C                                                         | -6.22314700 | -0.99127200 | -5.27557300  | H                                                                                  | 1.10121000  | -0.65496600 | -12.90787800 |
| H                                                         | -6.41795800 | -2.32320900 | -7.04451500  | H                                                                                  | -5.35132900 | 2.91288300  | -9.41067000  |
| H                                                         | -6.52427100 | -1.52751100 | -4.38903300  | H                                                                                  | -4.66778100 | 1.25143800  | -9.35542100  |
| C                                                         | -5.52692900 | -0.30690200 | -8.75121000  | H                                                                                  | -4.46056800 | 2.24288300  | -10.82287400 |
| C                                                         | -5.67986100 | 1.12862900  | -4.01654900  | C                                                                                  | -0.47295300 | 1.18768200  | -6.88376300  |
| N                                                         | -5.79793900 | 0.32308800  | -5.23648500  | C                                                                                  | -0.24236700 | 1.05207200  | -5.49498400  |
| N                                                         | -5.71147100 | -0.29646300 | -7.30056400  | C                                                                                  | -0.56119600 | 0.02192400  | -7.67813800  |
| Au                                                        | -4.82516100 | 2.66574300  | -6.91003100  | C                                                                                  | -0.11468600 | -0.20755200 | -4.92168200  |
| H                                                         | -6.14877000 | 2.10351800  | -4.16515400  | H                                                                                  | -0.17553900 | 1.94402300  | -4.88420600  |
| H                                                         | -4.62677500 | 1.26930200  | -3.76155200  | C                                                                                  | -0.43348900 | -1.23265500 | -7.09497900  |
| H                                                         | -6.18414700 | 0.60593200  | -3.20251800  | C                                                                                  | -0.72727400 | 0.09795300  | -8.74511100  |
| H                                                         | -4.80078200 | -1.07645200 | -9.02568700  | C                                                                                  | -0.21009600 | -1.35256100 | -5.71831000  |
| H                                                         | -5.15829200 | 0.66934600  | -9.06609500  | H                                                                                  | 0.05863800  | -0.29853900 | -3.85387100  |
| H                                                         | -6.48146100 | -0.51034400 | -9.24337900  | H                                                                                  | -0.50301900 | -2.12179200 | -7.71416600  |
| H                                                         | -3.87072900 | 5.80109400  | -11.40573100 | H                                                                                  | -0.10743500 | -2.33635500 | -5.26938600  |
| H                                                         | -4.70168800 | 7.01949800  | -10.37798700 |                                                                                    |             |             |              |
| H                                                         | -5.55940000 | 5.52618500  | -10.85061400 |                                                                                    |             |             |              |
| C                                                         | -4.84070700 | 5.29698500  | -4.75065600  | <b>NTf<sub>2</sub><sup>-</sup></b> E <sub>M06(dichloroethane)</sub> = -1827.212931 |             |             |              |
| C                                                         | -4.29039700 | 5.43067800  | -3.46442100  | N                                                                                  | 4.95988200  | 11.70760600 | 7.69350500   |
| C                                                         | -6.21441700 | 5.02909200  | -4.89897900  | S                                                                                  | 4.66794100  | 12.37260400 | 9.14103300   |
| C                                                         | -5.09815900 | 5.26468300  | -2.34248100  | S                                                                                  | 6.45036100  | 11.37726100 | 7.15288900   |
| H                                                         | -3.23503900 | 5.66147800  | -3.36113400  | C                                                                                  | 4.50539000  | 10.86788600 | 10.23899100  |
| C                                                         | -7.01885600 | 4.87371600  | -3.77050500  | C                                                                                  | 6.91417500  | 12.96524200 | 6.28137600   |
| H                                                         | -6.65046500 | 4.98993400  | -5.89251100  | F                                                                                  | 5.61005400  | 10.11247400 | 10.19691400  |
| C                                                         | -6.46015300 | 4.98019900  | -2.49323900  | F                                                                                  | 3.46010300  | 10.11329300 | 9.86521300   |
| H                                                         | -4.66933900 | 5.36381800  | -1.34980100  | F                                                                                  | 4.30539200  | 11.25536100 | 11.51338700  |
| H                                                         | -8.08249800 | 4.68845500  | -3.88813100  | F                                                                                  | 6.86037600  | 14.01267900 | 7.11359200   |
| H                                                         | -7.08789900 | 4.85904900  | -1.61504500  | F                                                                                  | 6.09079200  | 13.20087600 | 5.24803600   |
|                                                           |             |             |              | F                                                                                  | 8.16911800  | 12.86942600 | 5.80148100   |
|                                                           |             |             |              | O                                                                                  | 3.31289900  | 12.93602100 | 9.12027700   |
|                                                           |             |             |              | O                                                                                  | 5.75470000  | 13.15219800 | 9.74876000   |
|                                                           |             |             |              | O                                                                                  | 7.50147500  | 11.19434200 | 8.16276600   |
|                                                           |             |             |              | O                                                                                  | 6.33472000  | 10.40331500 | 6.06097100   |
| <b>Gp</b> E <sub>M06(dichloroethane)</sub> = -1375.986110 |             |             |              |                                                                                    |             |             |              |
| C                                                         | -0.63312800 | 2.53027100  | -7.42963800  | <b>Gp1</b> E <sub>M06(dichloroethane)</sub> = -3203.233546                         |             |             |              |
| C                                                         | -1.02022200 | 2.94144800  | -8.78683000  | C                                                                                  | -0.53944200 | 2.56654200  | -7.28686200  |
| C                                                         | -2.18558300 | 2.22909600  | -9.44688600  | C                                                                                  | -1.10175500 | 2.92481400  | -8.59643300  |
| O                                                         | -2.11858800 | 1.22345200  | -10.12715300 | C                                                                                  | -2.20688900 | 2.16575500  | -9.24466400  |
| O                                                         | -3.33911900 | 2.85311100  | -9.16426500  | O                                                                                  | -2.68364400 | 1.10899300  | -8.88260600  |
| C                                                         | -4.53500900 | 2.26765100  | -9.73292200  | O                                                                                  | -2.64242700 | 2.81620800  | -10.35838800 |
| C                                                         | -0.80777700 | 4.69258400  | -7.21133200  | C                                                                                  | -3.70066700 | 2.16111500  | -11.07410700 |
| C                                                         | -0.97548200 | 5.98909200  | -6.64390800  | C                                                                                  | -0.65033400 | 4.73654800  | -7.18861600  |
| C                                                         | -1.76142900 | 6.87786100  | -7.35168100  | C                                                                                  | -0.63909400 | 6.07010900  | -6.71306500  |
| C                                                         | -2.37526800 | 6.56542300  | -8.61346600  | C                                                                                  | -1.39991000 | 6.99955100  | -7.40964500  |
| C                                                         | -2.12837800 | 5.38409400  | -9.23924800  | C                                                                                  | -2.17546400 | 6.66321100  | -8.54946700  |
| C                                                         | -1.10351400 | 4.47291000  | -8.65739100  | C                                                                                  | -2.13526800 | 5.39910400  | -9.08005400  |
| C                                                         | -0.46423900 | 6.33904300  | -5.28766200  | C                                                                                  | -1.17397800 | 4.44386800  | -8.52628700  |
| H                                                         | -1.95170400 | 7.84419300  | -6.89013100  | C                                                                                  | 0.11063200  | 6.45748800  | -5.49455700  |
| H                                                         | -3.04681800 | 7.29279100  | -9.05819100  | H                                                                                  | -1.40247100 | 8.01936700  | -7.03374500  |
| H                                                         | -2.55905400 | 5.14700300  | -10.20564900 | H                                                                                  | -2.77150900 | 7.42981400  | -9.03171300  |
| H                                                         | -0.18283000 | 4.87879300  | -9.14257300  | H                                                                                  | -2.64751900 | 5.15359900  | -10.00068700 |
| H                                                         | 0.08731600  | 5.53365100  | -4.76796600  | H                                                                                  | -0.28673300 | 4.90341400  | -9.16368300  |
| N                                                         | -0.43446800 | 3.59052900  | -6.58507700  | H                                                                                  | 0.70436800  | 5.64523100  | -5.03536500  |
| O                                                         | -0.62946300 | 7.43398900  | -4.79034100  | N                                                                                  | -0.22741000 | 3.64438800  | -6.53828500  |
| C                                                         | 2.31477400  | 1.78976300  | -11.12112100 | O                                                                                  | 0.09766700  | 7.58374400  | -5.03174200  |
| C                                                         | 3.44270800  | 0.78751600  | -12.79527800 | C                                                                                  | 2.21671400  | 1.89119800  | -11.06489800 |
| C                                                         | 4.34395800  | 1.48004200  | -12.05170300 | C                                                                                  | 3.40715700  | 1.35249200  | -12.90209000 |
| H                                                         | 3.57154000  | 0.17433000  | -13.67378800 | C                                                                                  | 4.28790400  | 1.64793400  | -11.91090800 |
| H                                                         | 5.41272100  | 1.58844000  | -12.15348600 | H                                                                                  | 3.56572500  | 1.05689600  | -13.92722900 |
| C                                                         | 0.96060000  | 0.41447100  | -12.73374100 | H                                                                                  | 5.36627500  | 1.66527800  | -11.90159400 |
| C                                                         | 4.25084700  | 2.93749900  | -10.01047000 | C                                                                                  | 0.88859300  | 1.28804700  | -13.08304500 |
| N                                                         | 3.63505600  | 2.08736800  | -11.02848600 | C                                                                                  | 4.13615100  | 2.35006800  | -9.50984100  |
| N                                                         | 2.20372900  | 0.98608200  | -12.20997800 | N                                                                                  | 3.54048500  | 1.96707200  | -10.79081500 |
| Au                                                        | 0.76754100  | 2.37751400  | -9.92064500  | N                                                                                  | 2.14134500  | 1.50009400  | -12.36279100 |
| H                                                         | 3.50918300  | 3.16544000  | -9.24494100  |                                                                                    |             |             |              |
| H                                                         | 4.60510600  | 3.86707500  | -10.46435600 |                                                                                    |             |             |              |
| H                                                         | 5.09064400  | 2.40906100  | -9.55268700  |                                                                                    |             |             |              |

|                             |                                                 |             |              |                         |                                                 |             |              |
|-----------------------------|-------------------------------------------------|-------------|--------------|-------------------------|-------------------------------------------------|-------------|--------------|
| Au                          | 0.64314400                                      | 2.36962900  | -9.86347600  | N                       | 3.42600100                                      | 1.87263400  | -10.72443800 |
| H                           | 3.34312500                                      | 2.55369800  | -8.79299900  | N                       | 2.07838000                                      | 1.48950100  | -12.36276700 |
| H                           | 4.71566200                                      | 3.26415600  | -9.64550700  | Au                      | 0.53272700                                      | 2.33032900  | -9.84990900  |
| H                           | 4.77043800                                      | 1.53465600  | -9.15113400  | H                       | 3.16956600                                      | 2.40137400  | -8.71627300  |
| H                           | 0.29403800                                      | 2.20114500  | -13.06262400 | H                       | 4.58188200                                      | 3.11349400  | -9.50058900  |
| H                           | 0.32350900                                      | 0.47842500  | -12.61497800 | H                       | 4.59151900                                      | 1.37058300  | -9.05609700  |
| H                           | 1.11869300                                      | 1.02270300  | -14.11648500 | H                       | 0.77694200                                      | 2.28326100  | -13.80704400 |
| H                           | -3.92494200                                     | 2.81216500  | -11.91975000 | H                       | 0.00808200                                      | 1.31125900  | -12.53227700 |
| H                           | -4.58138900                                     | 2.03585800  | -10.43812000 | H                       | 0.94278700                                      | 0.50168900  | -13.81627700 |
| H                           | -3.37416300                                     | 1.17644200  | -11.42150500 | H                       | -4.08582700                                     | 2.75750500  | -11.79177700 |
| C                           | -0.24137400                                     | 1.23769100  | -6.72640800  | H                       | -4.70832700                                     | 2.03680500  | -10.26837300 |
| C                           | 0.15018500                                      | 1.16256000  | -5.37427300  | H                       | -3.55244600                                     | 1.12474400  | -11.26537600 |
| C                           | -0.31758200                                     | 0.04623000  | -7.47228000  | C                       | -0.26064900                                     | 1.22513400  | -6.68788300  |
| C                           | 0.44549800                                      | -0.06374500 | -4.78675700  | C                       | 0.18917800                                      | 1.15041400  | -5.35426700  |
| H                           | 0.21702800                                      | 2.07968800  | -4.80139300  | C                       | -0.36394700                                     | 0.03350600  | -7.42957800  |
| C                           | -0.01578200                                     | -1.17726400 | -6.88162900  | C                       | 0.51745900                                      | -0.07441700 | -4.78139800  |
| H                           | -0.61937700                                     | 0.07367400  | -8.51016500  | H                       | 0.27517400                                      | 2.06776100  | -4.78415500  |
| C                           | 0.36486900                                      | -1.23889500 | -5.53832800  | C                       | -0.03073500                                     | -1.18935900 | -6.85348100  |
| H                           | 0.74146500                                      | -0.10221900 | -3.74217200  | H                       | -0.71347100                                     | 0.05835800  | -8.45249600  |
| H                           | -0.07979200                                     | -2.08644500 | -7.47281200  | C                       | 0.40989300                                      | -1.25014600 | -5.52897100  |
| H                           | 0.59819100                                      | -2.19683900 | -5.08110500  | H                       | 0.85908800                                      | -0.11154800 | -3.75069100  |
| N                           | 0.90029500                                      | 5.82436700  | -9.99713100  | H                       | -0.11839300                                     | -2.09850700 | -7.44181600  |
| S                           | 0.57198400                                      | 6.54666400  | -11.42847100 | H                       | 0.66739100                                      | -2.20713800 | -5.08278000  |
| S                           | 2.39663600                                      | 5.55312300  | -9.41402200  | N                       | 0.78417400                                      | 5.70349300  | -9.91977300  |
| C                           | 0.43591700                                      | 5.08682000  | -12.58584500 | S                       | 0.45426900                                      | 6.44045500  | -11.35459800 |
| C                           | 2.86147100                                      | 7.18091700  | -8.61423400  | S                       | 2.29786100                                      | 5.45195500  | -9.33743700  |
| F                           | 1.57426600                                      | 4.38143400  | -12.61595800 | C                       | 0.38659200                                      | 5.01004000  | -12.55525400 |
| F                           | -0.55950200                                     | 4.26900600  | -12.18356400 | C                       | 2.76005400                                      | 7.09095600  | -8.55415400  |
| F                           | 0.15890900                                      | 5.51273700  | -13.82032500 | F                       | 1.55337300                                      | 4.35442500  | -12.59009200 |
| F                           | 2.89529000                                      | 8.16073000  | -9.51275500  | F                       | -0.58283100                                     | 4.15016400  | -12.19668700 |
| F                           | 1.96606900                                      | 7.48082800  | -7.66641600  | F                       | 0.11499900                                      | 5.46999000  | -13.77917800 |
| F                           | 4.06698200                                      | 7.04488300  | -8.05212200  | F                       | 2.85975800                                      | 8.05048800  | -9.46715100  |
| O                           | -0.80033600                                     | 7.04943100  | -11.35451600 | F                       | 1.83116600                                      | 7.42743300  | -7.65389200  |
| O                           | 1.65229000                                      | 7.36804600  | -11.96726700 | F                       | 3.93559400                                      | 6.93244300  | -7.93794300  |
| O                           | 3.43133300                                      | 5.26853800  | -10.41383600 | O                       | -0.93220300                                     | 6.89998900  | -11.29261300 |
| O                           | 2.21980500                                      | 4.63805500  | -8.27502400  | O                       | 1.52478600                                      | 7.30500700  | -11.83936000 |
|                             |                                                 |             |              | O                       | 3.31547200                                      | 5.16864300  | -10.35275900 |
|                             |                                                 |             |              | O                       | 2.13311500                                      | 4.54578100  | -8.19341400  |
| <b>TS<sub>Gp1-Gp2</sub></b> | $E_{M06(\text{dichloroethane})} = -3203.231074$ |             |              |                         |                                                 |             |              |
| C                           | -0.58720800                                     | 2.55457200  | -7.23542500  | <b>HNTf<sub>2</sub></b> | $E_{M06(\text{dichloroethane})} = -1827.639562$ |             |              |
| C                           | -1.16506100                                     | 2.90816900  | -8.54959100  | N                       | 4.98099800                                      | 11.71377200 | 7.70912500   |
| C                           | -2.29895000                                     | 2.15103000  | -9.15153300  | S                       | 4.58944900                                      | 12.40443300 | 9.21609600   |
| O                           | -2.78479300                                     | 1.11284000  | -8.75027600  | S                       | 6.51388000                                      | 11.34087800 | 7.06640300   |
| O                           | -2.75215700                                     | 2.77753900  | -10.27346200 | C                       | 4.52055100                                      | 10.87084600 | 10.29360500  |
| C                           | -3.84646600                                     | 2.12564800  | -10.93563000 | C                       | 6.96839300                                      | 12.98143100 | 6.27935200   |
| C                           | -0.73219100                                     | 4.72215000  | -7.14116500  | F                       | 5.70381800                                      | 10.27250500 | 10.29993800  |
| C                           | -0.74027400                                     | 6.05030300  | -6.66024300  | F                       | 3.59603600                                      | 10.04714800 | 9.79971800   |
| C                           | -1.50201900                                     | 6.98108400  | -7.36175000  | F                       | 4.18580200                                      | 11.24731500 | 11.52393600  |
| C                           | -2.25632700                                     | 6.64032900  | -8.50608700  | F                       | 7.02973800                                      | 13.92524800 | 7.20868100   |
| C                           | -2.20052900                                     | 5.36872400  | -9.03470900  | F                       | 6.03672600                                      | 13.28982100 | 5.37713200   |
| C                           | -1.26154500                                     | 4.42168100  | -8.46515000  | F                       | 8.14915200                                      | 12.83948700 | 5.68510000   |
| C                           | -0.00598700                                     | 6.43814200  | -5.43356200  | O                       | 3.22402500                                      | 12.88273700 | 9.06689300   |
| H                           | -1.51589800                                     | 7.99911700  | -6.98178800  | O                       | 5.70039200                                      | 13.21564200 | 9.67279200   |
| H                           | -2.85271000                                     | 7.39916400  | -9.00001300  | O                       | 7.44154200                                      | 11.09901000 | 8.15345100   |
| H                           | -2.70639100                                     | 5.11952700  | -9.95771300  | O                       | 6.25004400                                      | 10.40747400 | 5.98263700   |
| H                           | -0.33528600                                     | 4.94008400  | -9.13425100  | H                       | 4.18835600                                      | 11.49310000 | 7.10884100   |
| H                           | 0.58080200                                      | 5.62567300  | -4.96567000  | <b>Gp2</b>              | $E_{M06(\text{dichloroethane})} = -1375.608741$ |             |              |
| N                           | -0.28640100                                     | 3.62833100  | -6.49170500  | C                       | -0.61732000                                     | 2.58857900  | -7.16464700  |
| O                           | -0.02252300                                     | 7.56513800  | -4.97141000  | C                       | -1.29612400                                     | 2.75187500  | -8.49460100  |
| C                           | 2.11041200                                      | 1.83742100  | -11.04943800 | C                       | -2.41518500                                     | 1.84999400  | -8.89279600  |
| C                           | 3.36209200                                      | 1.33338700  | -12.85832100 | C                       | -2.77211800                                     | 0.83344400  | -8.33030400  |
| C                           | 4.20923300                                      | 1.57384500  | -11.82522500 | O                       | -3.02645800                                     | 2.29476700  | -10.02915500 |
| H                           | 3.55260500                                      | 1.06765100  | -13.88636500 | O                       | -4.13701500                                     | 1.50103400  | -10.46614400 |
| H                           | 5.28652000                                      | 1.55767400  | -11.77222700 | C                       | -0.89947600                                     | 4.74450300  | -7.37900000  |
| C                           | 0.87732600                                      | 1.39118900  | -13.18465300 |                         |                                                 |             |              |
| C                           | 3.98259900                                      | 2.20599100  | -9.41255800  |                         |                                                 |             |              |

|    |             |             |              |    |             |             |              |
|----|-------------|-------------|--------------|----|-------------|-------------|--------------|
| C  | -0.86808000 | 6.12959100  | -7.12791200  | C  | 4.44151500  | 1.83354400  | -9.69664100  |
| C  | -1.48418700 | 6.98090300  | -8.05807500  | C  | 4.31607000  | 3.15787900  | -9.97711100  |
| C  | -2.10814800 | 6.46814100  | -9.19675400  | H  | 5.30013100  | 1.18138400  | -9.72554600  |
| C  | -2.12269200 | 5.08949300  | -9.45588800  | H  | 5.04406800  | 3.88542500  | -10.29973500 |
| C  | -1.50837500 | 4.22778700  | -8.54918200  | C  | 2.87184100  | 0.04150200  | -8.85044400  |
| C  | -0.21369800 | 6.67715000  | -5.92431300  | C  | 2.42784700  | 4.83302100  | -9.88281600  |
| H  | -1.46405200 | 8.04844100  | -7.86031500  | N  | 2.98428600  | 3.48216200  | -9.78535800  |
| H  | -2.58770400 | 7.14633800  | -9.89795000  | N  | 3.18237600  | 1.38319700  | -9.34012800  |
| H  | -2.60512400 | 4.69538400  | -10.34351300 | Au | 0.36002800  | 2.35698500  | -8.72442400  |
| H  | 0.23265100  | 5.91786700  | -5.25232200  | H  | 2.35512200  | 5.26970600  | -8.88513500  |
| N  | -0.36771400 | 3.74192900  | -6.58029400  | H  | 1.43075900  | 4.77738200  | -10.32268200 |
| O  | -0.14811400 | 7.86837200  | -5.66053500  | H  | 3.07686100  | 5.43603700  | -10.52096100 |
| C  | 1.97043400  | 1.97217900  | -11.03324200 | H  | 3.71128900  | -0.62003700 | -9.07220100  |
| C  | 3.50701100  | 1.98355000  | -12.69084900 | H  | 1.97294100  | -0.32819900 | -9.34689700  |
| C  | 3.93339100  | 1.10837700  | -11.74425300 | H  | 2.69693400  | 0.07734200  | -7.77314100  |
| H  | 3.94346500  | 2.27793100  | -13.63268400 | H  | -3.97426600 | 1.36183200  | -11.40119500 |
| H  | 4.81434500  | 0.48704000  | -11.69905200 | H  | -4.57685100 | 0.56115200  | -9.91097500  |
| C  | 1.53294300  | 3.51722100  | -12.95215400 | H  | -3.09904400 | -0.03929400 | -10.69722000 |
| C  | 3.08725000  | 0.30675300  | -9.52017200  | C  | -0.88413100 | 1.12417800  | -5.65272700  |
| N  | 2.98129800  | 1.11185300  | -10.73783900 | C  | -0.91154500 | 1.19971400  | -4.24907800  |
| N  | 2.30294100  | 2.50038400  | -12.24039700 | C  | -0.42966800 | -0.06209900 | -6.25591400  |
| Au | 0.34206300  | 2.37526700  | -9.85891400  | C  | -0.45878600 | 0.13675700  | -3.47071500  |
| H  | 2.17753700  | 0.41756600  | -8.92957800  | H  | -1.28462200 | 2.09564700  | -3.76931500  |
| H  | 3.94170900  | 0.64389700  | -8.92673000  | C  | 0.01394200  | -1.12551800 | -5.47575300  |
| H  | 3.21795100  | -0.74520800 | -9.78801700  | H  | -0.41699100 | -0.14379100 | -7.33555000  |
| H  | 2.03397700  | 4.48705200  | -12.88150500 | C  | 0.01037000  | -1.02829400 | -4.08041200  |
| H  | 0.54420700  | 3.58979500  | -12.49873800 | H  | -0.47183200 | 0.22834200  | -2.38867300  |
| H  | 1.43275900  | 3.23050400  | -14.00228800 | H  | 0.36653600  | -2.03386600 | -5.95763400  |
| H  | -4.51899100 | 1.99822900  | -11.35925800 | H  | 0.36574200  | -1.85783400 | -3.47475800  |
| H  | -4.91038800 | 1.45402400  | -9.69385300  | N  | 1.00665500  | 3.93522900  | -4.39327800  |
| H  | -3.81574500 | 0.48179900  | -10.70190700 | S  | 2.25966600  | 4.20632400  | -5.44083700  |
| C  | -0.12155500 | 1.34053200  | -6.54584300  | S  | 1.14132000  | 3.97086500  | -2.71113100  |
| C  | 0.39953700  | 1.39497100  | -5.23958200  | C  | 3.00378200  | 2.50141400  | -5.67294300  |
| C  | -0.09737500 | 0.10700400  | -7.22182200  | C  | 1.25794900  | 5.82621400  | -2.28054200  |
| C  | 0.93245800  | 0.25952500  | -4.63467200  | F  | 3.64985300  | 2.11331000  | -4.58414000  |
| H  | 0.38274100  | 2.34550400  | -4.71813600  | F  | 2.05230500  | 1.60902000  | -5.97052400  |
| C  | 0.44155500  | -1.02739900 | -6.61558300  | F  | 3.86597800  | 2.56861700  | -6.70339700  |
| H  | -0.51891200 | 0.02891900  | -8.21579300  | F  | 1.49809100  | 6.56059200  | -3.36124500  |
| C  | 0.96076600  | -0.95805200 | -5.32061300  | F  | 0.12639100  | 6.20589900  | -1.70560300  |
| H  | 1.32746900  | 0.32482300  | -3.62410300  | F  | 2.26520400  | 5.96587700  | -1.41734500  |
| H  | 0.44445400  | -1.97147200 | -7.15489600  | O  | 1.65729900  | 4.54578600  | -6.73008300  |
| H  | 1.37607100  | -1.84460600 | -4.84820800  | O  | 3.31897400  | 5.00738200  | -4.84593100  |

**Gp3**  $E_{M06(dichloroethane)} = -3203.281211$

|   |             |            |              |
|---|-------------|------------|--------------|
| C | -1.26200500 | 2.31691300 | -6.42695600  |
| C | -1.66535600 | 2.42577000 | -7.84483600  |
| C | -2.46490000 | 1.37509700 | -8.53065700  |
| O | -2.70218700 | 0.25757400 | -8.11796200  |
| O | -2.90816400 | 1.80871000 | -9.74311400  |
| C | -3.68909100 | 0.85567600 | -10.47785600 |
| C | -1.62445900 | 4.46835200 | -6.75767700  |
| C | -1.73908900 | 5.86204200 | -6.56961300  |
| C | -2.20815600 | 6.62726200 | -7.64814400  |
| C | -2.55384300 | 6.03759700 | -8.86782000  |
| C | -2.43310100 | 4.65746600 | -9.05290900  |
| C | -1.96359400 | 3.87185600 | -7.99635900  |
| C | -1.43783000 | 6.53754900 | -5.30043100  |
| H | -2.31263900 | 7.70258100 | -7.52011800  |
| H | -2.92282400 | 6.65735100 | -9.68018800  |
| H | -2.69649700 | 4.19551600 | -9.99692400  |
| H | 0.00212600  | 3.83618100 | -4.86037500  |
| H | -1.59689700 | 7.63970900 | -5.32879200  |
| N | -1.18696900 | 3.51684500 | -5.85008500  |
| O | -1.05947800 | 6.00185200 | -4.27290300  |
| C | 2.28188500  | 2.39687500 | -9.37944300  |

**TS<sub>Gp3-Gp4</sub>**  $E_{M06(dichloroethane)} = -3203.272193$

|   |             |            |              |
|---|-------------|------------|--------------|
| C | -1.28877500 | 2.30995900 | -6.42236300  |
| C | -1.67418700 | 2.42074500 | -7.83836700  |
| C | -2.47700900 | 1.37104600 | -8.52568000  |
| O | -2.72006100 | 0.25630000 | -8.11031600  |
| O | -2.91224800 | 1.80457600 | -9.73995400  |
| C | -3.69004200 | 0.85215200 | -10.47964200 |
| C | -1.61941700 | 4.47378000 | -6.76804600  |
| C | -1.71670100 | 5.87218800 | -6.60509100  |
| C | -2.13618100 | 6.62810200 | -7.70854100  |
| C | -2.46346200 | 6.02894700 | -8.92920300  |
| C | -2.37159600 | 4.64561900 | -9.08664800  |
| C | -1.94327900 | 3.86864200 | -8.00488500  |
| C | -1.48143300 | 6.56991300 | -5.33073200  |
| H | -2.22338400 | 7.70668600 | -7.59725100  |
| H | -2.79708900 | 6.64432300 | -9.75991400  |
| H | -2.62194900 | 4.17092500 | -10.02761900 |
| H | -0.16899800 | 3.82477100 | -4.88583300  |
| H | -1.58837500 | 7.67633800 | -5.39598300  |
| N | -1.20930500 | 3.51443700 | -5.84440800  |

|                                                     |             |             |              |                                                                     |             |             |              |
|-----------------------------------------------------|-------------|-------------|--------------|---------------------------------------------------------------------|-------------|-------------|--------------|
| O                                                   | -1.22201000 | 6.03997500  | -4.26696500  | N                                                                   | -1.81865000 | 2.70627000  | -6.99332200  |
| C                                                   | 2.26955900  | 2.37468400  | -9.38867200  | O                                                                   | -4.78317700 | 5.69031200  | -6.00653300  |
| C                                                   | 4.44953800  | 1.88097600  | -9.68027900  | C                                                                   | 3.08544200  | 4.39547700  | -6.14653400  |
| C                                                   | 4.28284000  | 3.19759500  | -9.97439600  | C                                                                   | 4.94952500  | 4.53307500  | -4.89149400  |
| H                                                   | 5.32968200  | 1.25766600  | -9.69308300  | C                                                                   | 4.51824000  | 5.80022200  | -5.12604300  |
| H                                                   | 4.98914100  | 3.94573600  | -10.29812100 | H                                                                   | 5.80242200  | 4.16631800  | -4.34180600  |
| C                                                   | 2.94524900  | 0.05132700  | -8.81176700  | H                                                                   | 4.91456400  | 6.75294700  | -4.81070300  |
| C                                                   | 2.33581300  | 4.80844700  | -9.91710200  | C                                                                   | 4.19101500  | 2.22636200  | -5.56291100  |
| N                                                   | 2.93960300  | 3.47918700  | -9.79802300  | C                                                                   | 2.57453500  | 6.84802700  | -6.32206800  |
| N                                                   | 3.20211500  | 1.39141900  | -9.33297400  | N                                                                   | 3.37484900  | 5.69719900  | -5.89984700  |
| Au                                                  | 0.35008000  | 2.31632300  | -8.73013800  | N                                                                   | 4.05652300  | 3.68368800  | -5.52141600  |
| H                                                   | 2.16716700  | 5.22061200  | -8.92058100  | Au                                                                  | 1.54062500  | 3.64972600  | -7.23286400  |
| H                                                   | 1.38012800  | 4.72340300  | -10.43730200 | H                                                                   | 1.88858200  | 6.53722000  | -7.11047200  |
| H                                                   | 3.00879300  | 5.44957600  | -10.48952100 | H                                                                   | 3.23797500  | 7.62574200  | -6.70672000  |
| H                                                   | 3.73756400  | -0.62032900 | -9.14801900  | H                                                                   | 2.00298100  | 7.23692700  | -5.47795600  |
| H                                                   | 1.98305900  | -0.30137700 | -9.18617000  | H                                                                   | 4.70638400  | 1.92070700  | -6.47738500  |
| H                                                   | 2.91619700  | 0.08168200  | -7.72013600  | H                                                                   | 3.20070600  | 1.76944500  | -5.53137400  |
| H                                                   | -3.96846200 | 1.35871100  | -11.40470700 | H                                                                   | 4.76402100  | 1.90038100  | -4.69319400  |
| H                                                   | -4.58164800 | 0.55939800  | -9.91806900  | H                                                                   | 1.67683700  | 3.72139900  | -12.38139200 |
| H                                                   | -3.09938700 | -0.04335700 | -10.69478800 | H                                                                   | 0.93600500  | 2.08668000  | -12.30510900 |
| C                                                   | -0.98290000 | 1.09218100  | -5.65754700  | H                                                                   | 2.50699000  | 2.38154300  | -11.51704400 |
| C                                                   | -1.18821900 | 1.09370100  | -4.26955600  | C                                                                   | -0.49651400 | 0.65623300  | -7.08265100  |
| C                                                   | -0.47337100 | -0.07149100 | -6.26117200  | C                                                                   | 0.80762600  | 0.12669000  | -7.09070800  |
| C                                                   | -0.86727200 | -0.02266600 | -3.49958400  | C                                                                   | -1.55686000 | -0.15147000 | -6.62437300  |
| H                                                   | -1.61866900 | 1.96975100  | -3.80544500  | C                                                                   | 1.04293800  | -1.16500100 | -6.63376400  |
| C                                                   | -0.15501000 | -1.18530500 | -5.49270600  | H                                                                   | 1.62842800  | 0.72642000  | -7.46424100  |
| H                                                   | -0.32173100 | -0.09548800 | -7.33336900  | C                                                                   | -1.31560100 | -1.44592200 | -6.17201300  |
| C                                                   | -0.34521800 | -1.16469400 | -4.10697300  | H                                                                   | -2.58105600 | 0.20915900  | -6.66910700  |
| H                                                   | -1.02361600 | 0.00664100  | -2.42571800  | C                                                                   | -0.01451600 | -1.95355800 | -6.16917500  |
| H                                                   | 0.24260700  | -2.07447900 | -5.97476700  | H                                                                   | 2.05312300  | -1.56286000 | -6.64572000  |
| H                                                   | -0.09180400 | -2.03540400 | -3.50818600  | H                                                                   | -2.14413500 | -2.06129800 | -5.83565300  |
| N                                                   | 0.90885200  | 3.95203600  | -4.39191000  | H                                                                   | 0.17379800  | -2.96344000 | -5.81743100  |
| S                                                   | 2.09885000  | 4.21572500  | -5.50783000  | H                                                                   | -2.34195800 | 2.37316200  | -6.19453000  |
| S                                                   | 1.24841000  | 4.42865000  | -2.78034600  |                                                                     |             |             |              |
| C                                                   | 2.89887300  | 2.53099000  | -5.66545300  |                                                                     |             |             |              |
| C                                                   | -0.25789500 | 3.68508200  | -1.93083400  | <b>TS<sub>Gp4-Ap</sub></b> $E_{M06(dichloroethane)} = -1376.047169$ |             |             |              |
| F                                                   | 3.52759500  | 2.19893500  | -4.54761000  | C                                                                   | -0.92661500 | 2.21956400  | -7.60122600  |
| F                                                   | 1.98183600  | 1.59671400  | -5.95503500  | C                                                                   | -0.10846000 | 2.48927100  | -8.71618900  |
| F                                                   | 3.78530100  | 2.58092200  | -6.67791200  | C                                                                   | 0.71619200  | 1.51559500  | -9.46663000  |
| F                                                   | -1.38183500 | 3.88361200  | -2.61621800  | O                                                                   | 1.69286400  | 0.96016100  | -8.95622700  |
| F                                                   | -0.07059000 | 2.37415200  | -1.75485700  | O                                                                   | 0.35233300  | 1.35721000  | -10.72724700 |
| F                                                   | -0.34987500 | 4.27911000  | -0.74234700  | C                                                                   | 1.17887500  | 0.47717500  | -11.53510000 |
| O                                                   | 1.45679800  | 4.45356100  | -6.80281900  | C                                                                   | -1.25366500 | 4.40581600  | -8.16649800  |
| O                                                   | 3.15364300  | 5.09368900  | -5.01873700  | C                                                                   | -1.61475300 | 5.76591800  | -8.17773700  |
| O                                                   | 1.16482500  | 5.86795600  | -2.59158500  | C                                                                   | -1.06557900 | 6.55909200  | -9.19346200  |
| O                                                   | 2.39430400  | 3.66499200  | -2.29417500  | C                                                                   | -0.19747000 | 6.02503700  | -10.15720600 |
|                                                     |             |             |              | C                                                                   | 0.17166300  | 4.68095600  | -10.12446300 |
|                                                     |             |             |              | C                                                                   | -0.35112600 | 3.86383300  | -9.11284400  |
|                                                     |             |             |              | C                                                                   | -2.51621800 | 6.36376300  | -7.16919600  |
| <b>Gp4</b> $E_{M06(dichloroethane)} = -1376.067014$ |             |             |              | H                                                                   | -1.34353400 | 7.60805000  | -9.21643700  |
| C                                                   | -0.77393700 | 2.02389000  | -7.51828500  | H                                                                   | 0.19064700  | 6.66850000  | -10.94047200 |
| C                                                   | -0.13537600 | 2.87960600  | -8.49708800  | H                                                                   | 0.84787400  | 4.26922800  | -10.86731400 |
| C                                                   | 0.58180400  | 2.30515300  | -9.68529600  | H                                                                   | -2.96923300 | 5.65249300  | -6.44111600  |
| O                                                   | 0.89275900  | 1.14268300  | -9.82333800  | N                                                                   | -1.59370100 | 3.38543300  | -7.29708500  |
| O                                                   | 0.86076000  | 3.27056600  | -10.58212200 | O                                                                   | -2.76781300 | 7.54964900  | -7.10093000  |
| C                                                   | 1.54259200  | 2.82545500  | -11.77633400 | C                                                                   | 3.05299400  | 4.12728800  | -6.06851400  |
| C                                                   | -1.98479900 | 3.95943200  | -7.58216500  | C                                                                   | 3.72008900  | 6.01998300  | -5.05664300  |
| C                                                   | -2.93105900 | 4.96048300  | -7.31208300  | C                                                                   | 4.55261900  | 5.02292800  | -4.65573900  |
| C                                                   | -2.85540300 | 6.12146600  | -8.09181100  | C                                                                   | 4.55261900  | 5.02292800  | -4.65573900  |
| C                                                   | -1.88142900 | 6.26772300  | -9.08678500  | H                                                                   | 3.70343500  | 7.06960300  | -4.80780500  |
| C                                                   | -0.93537900 | 5.26986900  | -9.32802400  | H                                                                   | 5.39919100  | 5.03305400  | -3.98699100  |
| C                                                   | -0.98100600 | 4.09845200  | -8.56106700  | C                                                                   | 1.71940500  | 6.17489000  | -6.59796600  |
| C                                                   | -3.97328100 | 4.82643900  | -6.26920600  | C                                                                   | 4.75442600  | 2.55659900  | -5.09916800  |
| H                                                   | -3.58424000 | 6.90317800  | -7.90331600  | N                                                                   | 4.12990700  | 3.86647600  | -5.28999900  |
| H                                                   | -1.86114500 | 7.17508500  | -9.68242800  | N                                                                   | 2.80337900  | 5.45312700  | -5.92434100  |
| H                                                   | -0.17932200 | 5.38561500  | -10.09416400 | Au                                                                  | 1.98317800  | 2.89658900  | -7.22793400  |
| H                                                   | -3.98414400 | 3.86131800  | -5.71216100  | H                                                                   | 4.39755700  | 1.87818900  | -5.87429200  |

|   |             |             |              |   |             |             |             |
|---|-------------|-------------|--------------|---|-------------|-------------|-------------|
| H | 4.49332800  | 2.15878100  | -4.11491500  | H | -3.52947200 | 0.83333400  | 11.02859200 |
| H | 5.83874000  | 2.66008600  | -5.17955500  | C | -0.93217100 | 1.30381000  | 6.83950300  |
| H | 0.75541900  | 5.75604400  | -6.30395500  | C | -0.93170800 | 0.92793800  | 5.48491700  |
| H | 1.82758500  | 6.09179500  | -7.68128800  | C | -0.56234700 | 0.35578900  | 7.80719000  |
| H | 1.76266800  | 7.22475900  | -6.30611000  | C | -0.57761600 | -0.36731700 | 5.10756800  |
| H | 0.75441600  | 0.53063400  | -12.53612000 | H | -1.24044300 | 1.64552500  | 4.72885300  |
| H | 1.12820300  | -0.54018400 | -11.14190200 | C | -0.20839500 | -0.93611500 | 7.42692900  |
| H | 2.21427500  | 0.82530400  | -11.52404600 | H | -0.55360900 | 0.64201200  | 8.85211800  |
| C | -1.23235200 | 0.98468800  | -6.86792400  | C | -0.21416600 | -1.30288100 | 6.07773500  |
| C | -0.25748300 | 0.00134300  | -6.61825500  | H | -0.59305500 | -0.64569100 | 4.05749200  |
| C | -2.54373900 | 0.77837200  | -6.39620400  | H | 0.08043700  | -1.65838300 | 8.18552900  |
| C | -0.59000300 | -1.15041300 | -5.90855200  | H | 0.06269800  | -2.31208900 | 5.78568000  |
| H | 0.75747300  | 0.13953200  | -6.97052800  | H | -0.00003200 | 3.54076800  | 5.73689100  |
| C | -2.86746000 | -0.37442400 | -5.68462000  |   |             |             |             |
| H | -3.32500900 | 1.49860500  | -6.62393500  |   |             |             |             |
| C | -1.89084000 | -1.34134100 | -5.43598600  |   |             |             |             |
| H | 0.17330800  | -1.89913000 | -5.71863700  |   |             |             |             |
| H | -3.88501600 | -0.52230400 | -5.33593900  |   |             |             |             |
| H | -2.14325300 | -2.24034000 | -4.88179800  |   |             |             |             |
| H | -2.17413900 | 3.48213500  | -6.47659900  |   |             |             |             |

**PhC≡CCO<sub>2</sub>Me**  $E_{M06(dichloroethane)} = -536.056779$

|   |             |            |             |
|---|-------------|------------|-------------|
| C | -4.03116500 | 4.96041900 | 5.97387600  |
| C | -3.74882300 | 5.00461700 | 7.15353800  |
| C | -3.49093500 | 5.09419000 | 8.56894700  |
| O | -4.26301500 | 5.55905300 | 9.38404200  |
| O | -2.27319800 | 4.59209300 | 8.87516600  |
| C | -1.93695800 | 4.64432900 | 10.27221100 |
| H | -0.94037400 | 4.20806900 | 10.34674900 |
| H | -1.93410300 | 5.67840800 | 10.62906000 |
| H | -2.65591000 | 4.06932100 | 10.86311100 |
| C | -4.35494200 | 4.90529800 | 4.58815800  |
| C | -3.44280100 | 4.35619600 | 3.66506400  |
| C | -5.59130400 | 5.40012700 | 4.12750200  |
| C | -3.76492500 | 4.30541900 | 2.31148900  |
| H | -2.49125100 | 3.97565000 | 4.02294400  |
| C | -5.90386000 | 5.34474700 | 2.77181600  |
| H | -6.29170100 | 5.82251400 | 4.84115200  |
| C | -4.99355000 | 4.79852600 | 1.86223500  |
| H | -3.05730800 | 3.88083000 | 1.60497900  |
| H | -6.85865600 | 5.72815400 | 2.42331000  |
| H | -5.24112000 | 4.75717700 | 0.80510500  |

**PAP**  $E_{M06(dichloroethane)} = -935.708470$

|   |             |             |             |
|---|-------------|-------------|-------------|
| C | -1.24723900 | 2.69263200  | 7.20797700  |
| C | -2.01951300 | 3.27537600  | 8.20971700  |
| C | -2.90147600 | 2.65282000  | 9.20002900  |
| O | -3.50538500 | 3.27040300  | 10.06168000 |
| O | -3.00513100 | 1.30830700  | 9.06195300  |
| C | -3.87199500 | 0.66136400  | 10.00383800 |
| C | -1.05040900 | 4.94511900  | 6.95197600  |
| C | -0.71117200 | 6.24439000  | 6.52613600  |
| C | -1.25900800 | 7.31192300  | 7.25059300  |
| C | -2.10702500 | 7.09419200  | 8.34309400  |
| C | -2.43643700 | 5.80278400  | 8.75717200  |
| C | -1.89954500 | 4.70932400  | 8.06173100  |
| C | 0.16991500  | 6.49562300  | 5.37614600  |
| H | -1.00338400 | 8.31774600  | 6.93249000  |
| H | -2.51485800 | 7.94634700  | 8.87894200  |
| H | -3.09057200 | 5.62510500  | 9.60226200  |
| H | 0.55048700  | 5.58419700  | 4.85712600  |
| N | -0.68925800 | 3.70934000  | 6.45409000  |
| O | 0.49375300  | 7.59816800  | 4.97224300  |
| H | -4.89491600 | 1.03701500  | 9.90853400  |
| H | -3.82790200 | -0.39999800 | 9.75587300  |

**Fp1**  $E_{M06(dichloroethane)} = -1375.943630$

|    |             |             |             |
|----|-------------|-------------|-------------|
| C  | -1.48708400 | 1.14423900  | -0.08276500 |
| C  | -0.80388000 | 0.14027700  | 0.72239700  |
| C  | -1.57041800 | -0.63568100 | 1.71584600  |
| O  | -1.80756200 | -0.07019500 | 2.76664900  |
| O  | -1.84104300 | -1.88707700 | 1.38744600  |
| C  | -2.64478200 | -2.64136200 | 2.33341400  |
| C  | -2.94946600 | -0.56786300 | -1.07932300 |
| C  | -2.51854400 | -1.60933700 | -1.94220200 |
| C  | -3.33733500 | -2.73705600 | -2.11216400 |
| C  | -4.55538200 | -2.85276800 | -1.45116000 |
| C  | -4.97251500 | -1.81975900 | -0.60326300 |
| C  | -4.18308700 | -0.68776300 | -0.41508400 |
| C  | -1.21325500 | -1.57387000 | -2.60883700 |
| H  | -2.99722900 | -3.53414200 | -2.76925600 |
| H  | -5.17735200 | -3.73011200 | -1.59490600 |
| H  | -5.92504000 | -1.89259900 | -0.08609800 |
| H  | -4.51604300 | 0.12402900  | 0.22429400  |
| H  | -1.03203900 | -2.40929800 | -3.31569500 |
| N  | -2.25996200 | 0.62798100  | -0.97737800 |
| O  | -0.35066000 | -0.72298200 | -2.42845800 |
| C  | 3.04612000  | -0.71884900 | -0.24754400 |
| C  | 5.18558600  | -1.42346000 | -0.28943800 |
| C  | 4.89845500  | -0.90272800 | -1.51358800 |
| H  | 6.09089200  | -1.86425000 | 0.09832600  |
| H  | 5.50714700  | -0.80311300 | -2.39884800 |
| C  | 3.93876200  | -1.74575900 | 1.86227500  |
| C  | 2.87972200  | 0.17503900  | -2.57941300 |
| N  | 3.58531600  | -0.47812300 | -1.46983900 |
| N  | 4.03784300  | -1.30404400 | 0.47153900  |
| Au | 1.11309500  | -0.27069300 | 0.30994600  |
| H  | 2.79215600  | 1.24633700  | -2.38118500 |
| H  | 1.88507000  | -0.25921600 | -2.69388100 |
| H  | 3.45479300  | 0.02143400  | -3.49388300 |
| H  | 4.63698600  | -1.17715800 | 2.48206100  |
| H  | 4.17313600  | -2.81131700 | 1.92760900  |
| H  | 2.92184200  | -1.57612300 | 2.21576200  |
| H  | -2.76113700 | -3.62469300 | 1.88197200  |
| H  | -3.61461200 | -2.15480600 | 2.45909000  |
| H  | -2.12986400 | -2.70450900 | 3.29405600  |
| C  | -1.09603400 | 2.55425100  | -0.08397700 |
| C  | -1.45251500 | 3.39336200  | -1.15307700 |
| C  | -0.38473600 | 3.07089200  | 1.01203400  |
| C  | -1.08560500 | 4.73436900  | -1.12650100 |
| H  | -2.00279200 | 2.98042000  | -1.99255000 |
| C  | -0.02689700 | 4.41687200  | 1.03530600  |
| H  | -0.13649200 | 2.42366500  | 1.84948200  |
| C  | -0.37315800 | 5.24660600  | -0.03469600 |
| H  | -1.35249400 | 5.38435900  | -1.95423700 |
| H  | 0.51383800  | 4.81914900  | 1.88635400  |
| H  | -0.09272500 | 6.29581100  | -0.01754300 |

|                                                                            |             |             |              |                                                           |             |             |              |
|----------------------------------------------------------------------------|-------------|-------------|--------------|-----------------------------------------------------------|-------------|-------------|--------------|
| <b>TS<sub>Fp1-Ip</sub></b> $E_{M06}(\text{dichloroethane}) = -1375.943047$ |             |             |              | C                                                         | -0.73927600 | 6.19096100  | -4.87262000  |
| C                                                                          | -4.19128600 | 5.49595900  | -5.86816500  | C                                                         | -3.50256500 | 7.51041900  | -2.58461600  |
| C                                                                          | -4.33973200 | 4.69474500  | -7.12621800  | H                                                         | -1.27698800 | 8.84346100  | -2.08242700  |
| C                                                                          | -4.67681000 | 5.45338200  | -8.35193700  | H                                                         | 0.95822000  | 8.57812700  | -3.12752300  |
| O                                                                          | -5.71053900 | 6.09977600  | -8.30962500  | H                                                         | 1.29000900  | 6.87072100  | -4.91018700  |
| O                                                                          | -3.89526500 | 5.29107600  | -9.41061100  | H                                                         | -0.60804500 | 5.43924400  | -5.63952800  |
| C                                                                          | -4.31814300 | 5.98832100  | -10.61000200 | H                                                         | -3.50674300 | 8.33556000  | -1.84314900  |
| C                                                                          | -2.21356700 | 6.09802000  | -6.68620300  | N                                                         | -3.03949700 | 5.59954600  | -4.75548300  |
| C                                                                          | -1.89597600 | 4.76679800  | -7.13517000  | O                                                         | -4.51658300 | 6.85309600  | -2.77828200  |
| C                                                                          | -1.12179500 | 4.62132900  | -8.31048000  | C                                                         | -5.61034700 | 3.75843500  | -0.43399000  |
| C                                                                          | -0.63938600 | 5.73089700  | -8.97887100  | C                                                         | -6.43479000 | 3.17634300  | 1.58367800   |
| C                                                                          | -0.87918500 | 7.02629300  | -8.46698600  | C                                                         | -7.10915900 | 4.28122800  | 1.16669300   |
| C                                                                          | -1.63092700 | 7.21299800  | -7.31787600  | H                                                         | -6.51908900 | 2.59437000  | 2.48838300   |
| C                                                                          | -1.93057500 | 3.56759600  | -6.22937900  | H                                                         | -7.90183600 | 4.84397200  | 1.63482100   |
| H                                                                          | -0.86797600 | 3.62221700  | -8.65519900  | C                                                         | -4.57932000 | 1.75571500  | 0.67355500   |
| H                                                                          | -0.03403800 | 5.61005200  | -9.87165500  | C                                                         | -7.08518200 | 5.73268800  | -0.89062100  |
| H                                                                          | -0.47533100 | 7.88943800  | -8.98793900  | N                                                         | -6.58983100 | 4.62514100  | -0.06723500  |
| H                                                                          | -1.85498800 | 8.20299600  | -6.93528500  | N                                                         | -5.52266700 | 2.87000900  | 0.59045700   |
| H                                                                          | -1.65860000 | 2.63154500  | -6.75743900  | Au                                                        | -4.52613100 | 3.79070600  | -2.18399900  |
| N                                                                          | -3.16663700 | 6.27951700  | -5.71439500  | H                                                         | -7.84112900 | 5.36681900  | -1.59089700  |
| O                                                                          | -2.17977300 | 3.57039600  | -5.04182100  | H                                                         | -6.25924100 | 6.18140800  | -1.44428700  |
| C                                                                          | -5.39030800 | 0.82739300  | -6.38928100  | H                                                         | -7.53194400 | 6.48177900  | -0.23392400  |
| C                                                                          | -6.07999200 | -1.31246400 | -6.26106900  | H                                                         | -3.84177500 | 1.94860200  | 1.45752500   |
| C                                                                          | -5.66153200 | -0.94009600 | -5.02034700  | H                                                         | -4.07111800 | 1.64986100  | -0.28498400  |
| H                                                                          | -6.47725900 | -2.24805300 | -6.62311300  | H                                                         | -5.12211700 | 0.83449900  | 0.89957300   |
| H                                                                          | -5.62565400 | -1.49094000 | -4.09329200  | H                                                         | -1.65671400 | -0.12084400 | -3.31762200  |
| C                                                                          | -6.24690900 | -0.19742900 | -8.50667300  | H                                                         | -0.43263800 | 1.18661300  | -3.47984100  |
| C                                                                          | -4.73713700 | 1.18438500  | -4.00163200  | H                                                         | -1.29133000 | 0.59381000  | -4.92561200  |
| N                                                                          | -5.24076600 | 0.37190100  | -5.11766300  | C                                                         | -4.97390200 | 4.67617900  | -5.95223900  |
| N                                                                          | -5.90478200 | -0.21552300 | -7.08533700  | C                                                         | -5.19149600 | 5.76679500  | -6.81085100  |
| Au                                                                         | -4.90828300 | 2.75198300  | -6.92388300  | C                                                         | -5.80325500 | 3.54467900  | -6.01070900  |
| H                                                                          | -5.45887500 | 1.96716600  | -3.75516600  | C                                                         | -6.23530400 | 5.71850200  | -7.72721800  |
| H                                                                          | -3.78570400 | 1.64800300  | -4.27268300  | H                                                         | -4.54303000 | 6.63602000  | -6.74847700  |
| H                                                                          | -4.59193700 | 0.53500900  | -3.13712300  | C                                                         | -6.84705200 | 3.50342200  | -6.93086800  |
| H                                                                          | -7.32386200 | -0.33789100 | -8.63120700  | H                                                         | -5.62664400 | 2.71188600  | -5.33442000  |
| H                                                                          | -5.71011100 | -0.99576900 | -9.02542500  | H                                                         | -7.06114800 | 4.58827500  | -7.78718200  |
| H                                                                          | -5.95655100 | 0.76665900  | -8.92451700  | C                                                         | -6.41065400 | 6.55596600  | -8.39526200  |
| H                                                                          | -3.55046900 | 5.76780300  | -11.35026000 | H                                                         | -7.49169300 | 2.63165500  | -6.98321900  |
| H                                                                          | -4.37781400 | 7.06196100  | -10.41738800 | H                                                         | -7.87539700 | 4.55498100  | -8.50521400  |
| H                                                                          | -5.29346900 | 5.61918700  | -10.93495600 | <b>Ip</b> $E_{M06}(\text{dichloroethane}) = -1375.979608$ |             |             |              |
| C                                                                          | -5.17610300 | 5.29973500  | -4.79511500  | C                                                         | -3.93123600 | 5.54316900  | -5.71859300  |
| C                                                                          | -4.73292500 | 5.27141100  | -3.46123800  | C                                                         | -3.76219300 | 4.78665200  | -6.98968300  |
| C                                                                          | -6.53631100 | 5.09421000  | -5.09243600  | C                                                         | -4.64485200 | 5.18272200  | -8.14882400  |
| C                                                                          | -5.64352400 | 5.02188700  | -2.43779800  | O                                                         | -5.64327000 | 5.86485800  | -8.06023400  |
| H                                                                          | -3.67877900 | 5.41864800  | -3.25316400  | O                                                         | -4.20435400 | 4.65738800  | -9.31144300  |
| C                                                                          | -7.44192700 | 4.85654700  | -4.06059000  | C                                                         | -4.99215000 | 4.99271200  | -10.47586100 |
| H                                                                          | -6.87512200 | 5.15815200  | -6.12213100  | C                                                         | -1.86241100 | 5.98792200  | -6.24312100  |
| C                                                                          | -6.99533800 | 4.81253400  | -2.73584100  | C                                                         | -2.22156000 | 4.92215100  | -7.21595900  |
| H                                                                          | -5.30263000 | 4.99332200  | -1.40714600  | C                                                         | -1.52493400 | 4.99383000  | -8.51853400  |
| H                                                                          | -8.49436100 | 4.71553100  | -4.28727300  | C                                                         | -0.41795500 | 5.77004700  | -8.63240300  |
| H                                                                          | -7.70254400 | 4.62420500  | -1.93303800  | C                                                         | 0.04101900  | 6.58914100  | -7.53789100  |
| <b>TS<sub>Fp1-Np</sub></b> $E_{M06}(\text{dichloroethane}) = -1375.939841$ |             |             |              | C                                                         | -0.64436300 | 6.69469500  | -6.34884000  |
| C                                                                          | -3.89166600 | 4.69644900  | -4.98642900  | C                                                         | -1.65276200 | 3.58523400  | -6.46780000  |
| C                                                                          | -3.53732100 | 3.74596000  | -3.94504600  | H                                                         | -1.83507100 | 4.32238500  | -9.30748600  |
| C                                                                          | -2.33836500 | 2.90438000  | -4.22481700  | H                                                         | 0.15481800  | 5.77170200  | -9.55416800  |
| O                                                                          | -1.39612800 | 3.23387900  | -4.92095500  | H                                                         | 0.95008000  | 7.16797000  | -7.67747000  |
| O                                                                          | -2.44810500 | 1.72489300  | -3.59577400  | H                                                         | -0.33981300 | 7.37495000  | -5.56110200  |
| C                                                                          | -1.37832700 | 0.78572200  | -3.85317400  | H                                                         | -1.94246000 | 3.57508200  | -5.39849100  |
| C                                                                          | -2.01488000 | 6.33795900  | -4.28432900  | N                                                         | -2.80223500 | 6.17153300  | -5.31179800  |
| C                                                                          | -2.21355600 | 7.31236000  | -3.25728900  | O                                                         | -1.01545200 | 2.72486000  | -7.00184900  |
| C                                                                          | -1.12626300 | 8.10256200  | -2.86396200  | C                                                         | -4.94657600 | 0.76281900  | -6.39587300  |
| C                                                                          | 0.13016900  | 7.95451600  | -3.44804900  | C                                                         | -6.08414600 | -1.10267300 | -5.84539200  |
| C                                                                          | 0.31413500  | 6.99518900  | -4.45061700  | C                                                         | -4.90674400 | -1.48921200 | -6.40334600  |
|                                                                            |             |             |              | H                                                         | -6.90168500 | -1.68153300 | -5.44461400  |

|                           |                                                 |             |              |           |                                                 |             |              |
|---------------------------|-------------------------------------------------|-------------|--------------|-----------|-------------------------------------------------|-------------|--------------|
| H                         | -4.49795200                                     | -2.47130200 | -6.58340600  | H         | -4.97822700                                     | 6.07158800  | -10.75911800 |
| C                         | -7.20409600                                     | 1.09807300  | -5.36321500  | H         | -5.91587900                                     | 4.57730800  | -10.51108100 |
| C                         | -2.91441400                                     | -0.30868700 | -7.39558100  | C         | -5.28358900                                     | 5.70476300  | -5.01823500  |
| N                         | -4.22003300                                     | -0.33270900 | -6.73055400  | C         | -5.29184700                                     | 6.39438300  | -3.78804600  |
| N                         | -6.08929700                                     | 0.28200800  | -5.84470000  | C         | -6.47311900                                     | 5.08716300  | -5.45429800  |
| Au                        | -4.41134200                                     | 2.71601900  | -6.67081900  | C         | -6.44879300                                     | 6.45666400  | -3.01800500  |
| H                         | -2.34834900                                     | 0.56392400  | -7.06719000  | H         | -4.38071900                                     | 6.87574000  | -3.45209700  |
| H                         | -3.04666200                                     | -0.26955300 | -8.48022300  | C         | -7.62764600                                     | 5.15098700  | -4.67925000  |
| H                         | -2.36575500                                     | -1.21327700 | -7.12694800  | H         | -6.50987900                                     | 4.58545000  | -6.41237500  |
| H                         | -7.94815700                                     | 1.22448700  | -6.15484100  | C         | -7.61969300                                     | 5.83285500  | -3.45842100  |
| H                         | -6.83028700                                     | 2.07560800  | -5.05538600  | H         | -6.43919100                                     | 6.99429000  | -2.07466400  |
| H                         | -7.66363100                                     | 0.60349800  | -4.50497900  | H         | -8.53972500                                     | 4.68104000  | -5.03558400  |
| H                         | -4.49423300                                     | 4.50059100  | -11.31081100 | H         | -8.52349700                                     | 5.88453400  | -2.85805500  |
| H                         | -5.01690800                                     | 6.07534200  | -10.62024000 |           |                                                 |             |              |
| H                         | -6.01295800                                     | 4.62133100  | -10.35780000 | <b>Jp</b> | $E_{M06(\text{dichloroethane})} = -1375.983431$ |             |              |
| C                         | -5.11681700                                     | 5.65268500  | -4.88455100  | C         | -3.93943900                                     | 5.60543400  | -5.56997100  |
| C                         | -5.00576200                                     | 6.31080900  | -3.63687600  | C         | -3.94711200                                     | 5.13194300  | -7.00552200  |
| C                         | -6.37287000                                     | 5.12633900  | -5.26563100  | C         | -4.90886300                                     | 5.49764900  | -8.10176600  |
| C                         | -6.10669900                                     | 6.42279400  | -2.79654500  | O         | -4.82657800                                     | 5.05224000  | -9.23285800  |
| H                         | -4.04727300                                     | 6.72454600  | -3.34729500  | O         | -5.81655200                                     | 6.38974700  | -7.70111400  |
| C                         | -7.47031300                                     | 5.25030800  | -4.42401100  | C         | -6.78049700                                     | 6.80286000  | -8.69702900  |
| H                         | -6.49529300                                     | 4.65629700  | -6.23203300  | C         | -1.81403800                                     | 5.34245900  | -6.09504700  |
| C                         | -7.34068000                                     | 5.89276300  | -3.18612400  | C         | -2.56254400                                     | 5.09821300  | -7.35194000  |
| H                         | -6.00671000                                     | 6.92607800  | -1.83996100  | C         | -1.85508300                                     | 4.98832300  | -8.57142800  |
| H                         | -8.43414200                                     | 4.85811700  | -4.73455700  | C         | -0.52164400                                     | 5.34765100  | -8.57399300  |
| H                         | -8.20211000                                     | 5.98492200  | -2.53079800  | C         | 0.15833800                                      | 5.87953900  | -7.41733700  |
|                           |                                                 |             |              | C         | -0.48404700                                     | 5.97405600  | -6.22107400  |
|                           |                                                 |             |              | C         | -1.26902800                                     | 3.78129200  | -5.76952500  |
| <b>TS<sub>Ip-Jp</sub></b> | $E_{M06(\text{dichloroethane})} = -1375.975003$ |             |              | H         | -2.38048700                                     | 4.72574800  | -9.48182300  |
| C                         | -4.02748700                                     | 5.64123800  | -5.77506300  | H         | 0.02978800                                      | 5.29826500  | -9.50919600  |
| C                         | -3.77065700                                     | 4.93583300  | -7.07580200  | H         | 1.17429500                                      | 6.24361700  | -7.53128200  |
| C                         | -4.65786900                                     | 5.24120900  | -8.26185800  | H         | -0.02059000                                     | 6.36906100  | -5.32275500  |
| O                         | -5.69253600                                     | 5.86719800  | -8.22110900  | H         | -0.55953900                                     | 3.42771700  | -6.53937400  |
| O                         | -4.14992200                                     | 4.71303300  | -9.39896100  | N         | -2.73483800                                     | 5.72525600  | -5.08154100  |
| C                         | -4.90911700                                     | 4.99341500  | -10.59672100 | O         | -1.64139100                                     | 3.17166000  | -4.82143400  |
| C                         | -1.90230000                                     | 5.99215200  | -6.14698800  | C         | -4.72911800                                     | 0.96197600  | -6.54593400  |
| C                         | -2.31058600                                     | 5.17715200  | -7.26757800  | C         | -5.36253700                                     | -1.17566800 | -6.83979100  |
| C                         | -1.42553800                                     | 4.99413500  | -8.36362300  | C         | -4.99470100                                     | -1.03046500 | -5.53866100  |
| C                         | -0.14966900                                     | 5.50309600  | -8.25666700  | H         | -5.72450800                                     | -2.03532100 | -7.38208200  |
| C                         | 0.26881000                                      | 6.25696600  | -7.11867200  | H         | -4.97530800                                     | -1.74023100 | -4.72636400  |
| C                         | -0.58659300                                     | 6.51972200  | -6.07052400  | C         | -5.48248900                                     | 0.32058600  | -8.85423300  |
| C                         | -1.47132500                                     | 3.86827500  | -5.80977100  | C         | -4.14676800                                     | 0.88600700  | -4.11847500  |
| H                         | -1.74917700                                     | 4.44069500  | -9.23559900  | N         | -4.60939000                                     | 0.28776900  | -5.37588400  |
| H                         | 0.55959100                                      | 5.34328000  | -9.06292400  | N         | -5.19426000                                     | 0.05904200  | -7.44325500  |
| H                         | 1.28385600                                      | 6.64122700  | -7.09190000  | Au        | -4.30308000                                     | 2.92733000  | -6.81280800  |
| H                         | -0.29501300                                     | 7.11655300  | -5.21322300  | H         | -3.14274900                                     | 1.29372800  | -4.24714900  |
| H                         | -2.28083800                                     | 3.80107100  | -5.06234200  | H         | -4.13446100                                     | 0.11308900  | -3.34902200  |
| N                         | -2.92633900                                     | 6.18607800  | -5.25629400  | H         | -4.82586600                                     | 1.68775000  | -3.82002200  |
| O                         | -0.47165900                                     | 3.31772200  | -6.02409400  | H         | -4.82743200                                     | -0.28738300 | -9.48361900  |
| C                         | -4.77441500                                     | 0.86215500  | -6.44149500  | H         | -5.30960600                                     | 1.37651500  | -9.06378500  |
| C                         | -5.75963500                                     | -0.95936700 | -5.55224800  | H         | -6.52632200                                     | 0.07572600  | -9.06588700  |
| C                         | -4.98493500                                     | -1.37724000 | -6.58701200  | H         | -7.44214100                                     | 7.49690700  | -8.18074800  |
| H                         | -6.39203500                                     | -1.51095000 | -4.87391000  | H         | -7.33344200                                     | 5.93616600  | -9.06800700  |
| H                         | -4.81343900                                     | -2.36312400 | -6.99072100  | H         | -6.27313900                                     | 7.29275400  | -9.53116700  |
| C                         | -6.26586400                                     | 1.24259700  | -4.45423700  | C         | -5.12062200                                     | 5.83168100  | -4.71966900  |
| C                         | -3.47405700                                     | -0.27851300 | -8.26158000  | C         | -4.97108200                                     | 6.58552200  | -3.54181000  |
| N                         | -4.38932900                                     | -0.24719100 | -7.12114700  | C         | -6.37648400                                     | 5.27523100  | -5.01697200  |
| N                         | -5.62241700                                     | 0.41619500  | -5.47879800  | C         | -6.05382900                                     | 6.78509200  | -2.69053800  |
| Au                        | -4.23239200                                     | 2.81119300  | -6.76044100  | H         | -3.99999900                                     | 7.00888300  | -3.30964200  |
| H                         | -3.20789800                                     | 0.74398100  | -8.52951100  | C         | -7.45515400                                     | 5.46611500  | -4.15600600  |
| H                         | -3.96366200                                     | -0.75931000 | -9.11216000  | H         | -6.51618800                                     | 4.69278900  | -5.92087200  |
| H                         | -2.56991000                                     | -0.83285900 | -7.99625500  | C         | -7.29850900                                     | 6.22464400  | -2.99346800  |
| H                         | -7.26744200                                     | 0.85244100  | -4.26174100  | H         | -5.92793000                                     | 7.37742500  | -1.78911300  |
| H                         | -6.34565000                                     | 2.27212300  | -4.80535300  | H         | -8.41917500                                     | 5.02640700  | -4.39497800  |
| H                         | -5.68076200                                     | 1.21933500  | -3.53067300  | H         | -8.14245300                                     | 6.37996600  | -2.32752700  |
| H                         | -4.35823800                                     | 4.51434700  | -11.40571900 |           |                                                 |             |              |



**TS<sub>Jp-Kp</sub>**  $E_{M06}(\text{dichloroethane}) = -1375.981982$ 

|    |             |             |              |
|----|-------------|-------------|--------------|
| C  | -3.95679200 | 5.54558000  | -5.71647900  |
| C  | -3.97256900 | 5.14026700  | -7.16448400  |
| C  | -5.02945300 | 5.61083200  | -8.12162400  |
| O  | -6.03483000 | 6.21442200  | -7.82395000  |
| O  | -4.71530400 | 5.26609700  | -9.39458700  |
| C  | -5.65658900 | 5.70985000  | -10.39692700 |
| C  | -1.86842300 | 5.60428300  | -6.31929900  |
| C  | -2.56453100 | 5.27053600  | -7.54412000  |
| C  | -1.83580200 | 5.17650300  | -8.73489900  |
| C  | -0.46110000 | 5.44646000  | -8.71021000  |
| C  | 0.21810600  | 5.83862500  | -7.53394600  |
| C  | -0.47010700 | 5.92922000  | -6.32982600  |
| C  | -1.08928000 | 3.75524900  | -6.19159400  |
| H  | -2.33551500 | 4.92311500  | -9.66181100  |
| H  | 0.10159600  | 5.37083200  | -9.63621500  |
| H  | 1.27961000  | 6.05908100  | -7.57230700  |
| H  | 0.00671400  | 6.22334900  | -5.40019800  |
| H  | -0.62257100 | 3.52281000  | -7.16434800  |
| N  | -2.73319100 | 5.77087600  | -5.26217200  |
| O  | -1.31065400 | 3.16887200  | -5.21066100  |
| C  | -4.72780400 | 1.02967900  | -6.49413200  |
| C  | -5.18779500 | -1.17406900 | -6.51165900  |
| C  | -5.17308400 | -0.76816800 | -5.21415900  |
| H  | -5.36850100 | -2.14381300 | -6.94872900  |
| H  | -5.33654600 | -1.31744900 | -4.30007400  |
| C  | -4.85600800 | -0.06751600 | -8.74327800  |
| C  | -4.78005200 | 1.43653100  | -4.03122100  |
| N  | -4.89057900 | 0.58598500  | -5.22195400  |
| N  | -4.91210900 | -0.05648400 | -7.28258400  |
| Au | -4.33377100 | 2.97395600  | -6.95311200  |
| H  | -3.77055700 | 1.84822100  | -3.96256100  |
| H  | -4.98850000 | 0.83058300  | -3.14851500  |
| H  | -5.49992300 | 2.25617800  | -4.09142400  |
| H  | -4.10576100 | -0.78840000 | -9.07834200  |
| H  | -4.58465900 | 0.92938200  | -9.09111900  |
| H  | -5.83361500 | -0.33979400 | -9.14971800  |
| H  | -5.25184200 | 5.36231900  | -11.34727800 |
| H  | -5.74010400 | 6.79925300  | -10.38580600 |
| H  | -6.64073300 | 5.27295600  | -10.21061400 |
| C  | -5.09127100 | 5.60223100  | -4.78218000  |
| C  | -4.87254200 | 6.14049200  | -3.49821000  |
| C  | -6.36526000 | 5.08903900  | -5.09300500  |
| C  | -5.89575900 | 6.16306600  | -2.55597400  |
| H  | -3.89277700 | 6.53637600  | -3.25694100  |
| C  | -7.38286300 | 5.10282200  | -4.14204700  |
| H  | -6.57122000 | 4.69545200  | -6.07972400  |
| C  | -7.15329000 | 5.64032800  | -2.87250300  |
| H  | -5.71379900 | 6.58888800  | -1.57370200  |
| H  | -8.36076300 | 4.70573100  | -4.39799500  |
| H  | -7.95197900 | 5.65799800  | -2.13641000  |

**Kp**  $E_{M06}(\text{dichloroethane}) = -1376.004752$ 

|   |             |            |              |
|---|-------------|------------|--------------|
| C | -4.11580400 | 5.54307300 | -5.82112900  |
| C | -4.06899600 | 5.13269600 | -7.22667100  |
| C | -5.11511200 | 5.50141400 | -8.23764700  |
| O | -6.18356000 | 6.02062600 | -8.00245100  |
| O | -4.71031800 | 5.16429700 | -9.48307400  |
| C | -5.63797800 | 5.49420600 | -10.54070500 |
| C | -1.99880500 | 5.60193600 | -6.31838900  |
| C | -2.62742900 | 5.22909800 | -7.55100300  |
| C | -1.86807100 | 5.06430400 | -8.68341900  |
| C | -0.43511900 | 5.22017500 | -8.63090500  |
| C | 0.21025100  | 5.50933400 | -7.47375400  |

|    |             |             |              |
|----|-------------|-------------|--------------|
| C  | -0.52253200 | 5.70690700  | -6.19097400  |
| C  | -0.03021200 | 4.73439200  | -5.05844700  |
| H  | -2.34538800 | 4.81046800  | -9.62336500  |
| H  | 0.12895000  | 5.07977900  | -9.54765400  |
| H  | 1.29281800  | 5.56983800  | -7.43693200  |
| H  | -0.27473700 | 6.69726500  | -5.76728000  |
| H  | -0.68547300 | 4.75856500  | -4.16640000  |
| N  | -2.85450800 | 5.77271700  | -5.32196600  |
| O  | 0.95289100  | 4.05347700  | -5.14771700  |
| C  | -4.71327200 | 0.98273900  | -6.54096600  |
| C  | -4.61463800 | -1.26769400 | -6.54851300  |
| C  | -5.65931600 | -0.90603500 | -5.75889400  |
| H  | -4.22515300 | -2.24020400 | -6.80693500  |
| H  | -6.36401600 | -1.50270800 | -5.20071800  |
| C  | -2.87376500 | -0.06288800 | -7.89398100  |
| C  | -6.72588800 | 1.26604800  | -5.07011200  |
| N  | -5.70332300 | 0.47742900  | -5.76135200  |
| N  | -4.04600600 | -0.09643200 | -7.02000500  |
| Au | -4.36408400 | 2.95770400  | -6.88495200  |
| H  | -6.31151900 | 2.23335500  | -4.78297800  |
| H  | -7.03819900 | 0.72932900  | -4.17236000  |
| H  | -7.58836100 | 1.42024000  | -5.72439100  |
| H  | -2.01952800 | -0.51592700 | -7.38413000  |
| H  | -2.64256200 | 0.97451800  | -8.13541400  |
| H  | -3.08633700 | -0.61145200 | -8.81506800  |
| H  | -5.15750700 | 5.16075700  | -11.46012300 |
| H  | -5.81911400 | 6.57135800  | -10.56540000 |
| H  | -6.58625200 | 4.97350700  | -10.38656900 |
| C  | -5.24859500 | 5.69350100  | -4.91872300  |
| C  | -5.03575900 | 6.33130700  | -3.67551500  |
| C  | -6.53842500 | 5.19952700  | -5.21613700  |
| C  | -6.07988100 | 6.48154200  | -2.76986900  |
| H  | -4.04677100 | 6.70709600  | -3.44232400  |
| C  | -7.57376500 | 5.34374100  | -4.30139000  |
| H  | -6.72728500 | 4.71224900  | -6.16323500  |
| C  | -7.35074300 | 5.98750200  | -3.07798300  |
| H  | -5.90438300 | 6.98336600  | -1.82328200  |
| H  | -8.56140000 | 4.96233500  | -4.54305900  |
| H  | -8.16582900 | 6.10338400  | -2.36940900  |

**Kp1**  $E_{M06}(\text{dichloroethane}) = -3203.233421$ 

|   |             |             |              |
|---|-------------|-------------|--------------|
| C | -4.11798900 | 5.86151800  | -6.23804100  |
| C | -4.22121900 | 5.42066400  | -7.64196800  |
| C | -5.32057700 | 5.83304500  | -8.55920600  |
| O | -6.34220000 | 6.41041100  | -8.25517300  |
| O | -5.04277600 | 5.46432400  | -9.83850000  |
| C | -6.02218300 | 5.86866900  | -10.81068100 |
| C | -2.05591300 | 5.72951800  | -6.90049400  |
| C | -2.80423000 | 5.42894100  | -8.08111000  |
| C | -2.14546500 | 5.24097400  | -9.27457400  |
| C | -0.71588100 | 5.34250700  | -9.33707000  |
| C | 0.02959200  | 5.58826800  | -8.22356800  |
| C | -0.59051200 | 5.80031500  | -6.89464800  |
| C | 0.08623000  | 4.88225900  | -5.84656700  |
| H | -2.70753700 | 5.02549600  | -10.17636200 |
| H | -0.23127600 | 5.21595200  | -10.30037500 |
| H | 1.11293000  | 5.64601100  | -8.28727900  |
| H | -0.34956300 | 6.85236200  | -6.54401200  |
| H | 1.12101400  | 5.17843000  | -5.60277700  |
| N | -2.82111200 | 5.96424600  | -5.83818600  |
| O | -0.42594200 | 3.89068700  | -5.38938500  |
| C | -4.32522000 | 1.43502800  | -6.25512600  |
| C | -4.45743200 | -0.75669900 | -5.75113200  |
| C | -3.80807400 | -0.13626500 | -4.73017000  |
| H | -4.72218000 | -1.79193200 | -5.89933500  |

|                             |                                        |             |                     |                           |                                        |             |                     |
|-----------------------------|----------------------------------------|-------------|---------------------|---------------------------|----------------------------------------|-------------|---------------------|
| H                           | -3.39533200                            | -0.52759600 | -3.81353300         | C                         | -3.83670500                            | -0.31340600 | -4.92738100         |
| C                           | -5.46908800                            | -0.02277900 | -7.93375100         | H                         | -4.87647900                            | -1.87897400 | -6.11525200         |
| C                           | -3.11572000                            | 2.25019400  | -4.22392500         | H                         | -3.38383100                            | -0.76304400 | -4.05764000         |
| N                           | -3.73540800                            | 1.20552000  | -5.05493500         | C                         | -5.68125700                            | 0.01368700  | -8.01365100         |
| N                           | -4.76760700                            | 0.22542900  | -6.67856100         | C                         | -3.04412100                            | 2.02207900  | -4.34238100         |
| Au                          | -4.41270500                            | 3.28902100  | -7.07750100         | N                         | -3.73816500                            | 1.04057100  | -5.19091600         |
| H                           | -2.30842700                            | 2.74290000  | -4.76930800         | N                         | -4.90175100                            | 0.17597600  | -6.79097200         |
| H                           | -2.71537000                            | 1.78166800  | -3.32362300         | Au                        | -4.46331800                            | 3.24549500  | -7.06521300         |
| H                           | -3.86837400                            | 2.99166800  | -3.94633600         | H                         | -2.26519400                            | 2.54307800  | -4.90252500         |
| H                           | -4.89127300                            | -0.71456900 | -8.55310800         | H                         | -2.59075100                            | 1.49269000  | -3.50301700         |
| H                           | -5.58473700                            | 0.92468000  | -8.46064600         | H                         | -3.76095600                            | 2.75612200  | -3.96775000         |
| H                           | -6.45578000                            | -0.44854600 | -7.73109500         | H                         | -5.14467900                            | -0.62970700 | -8.71682100         |
| H                           | -5.64522600                            | 5.51109100  | -11.76956100        | H                         | -5.83053600                            | 0.99584600  | -8.46287400         |
| H                           | -6.12788600                            | 6.95683400  | -10.81984000        | H                         | -6.65270100                            | -0.43000200 | -7.77864100         |
| H                           | -6.99407600                            | 5.42031900  | -10.58607800        | H                         | -5.53080800                            | 5.77325500  | -11.65011600        |
| C                           | -5.16025100                            | 6.13646600  | -5.25481600         | H                         | -5.95994000                            | 7.18804400  | -10.63085200        |
| C                           | -4.79913200                            | 6.85022000  | -4.09047400         | H                         | -6.90688400                            | 5.68788800  | -10.49808900        |
| C                           | -6.49021400                            | 5.69323200  | -5.40579800         | C                         | -5.18618300                            | 6.09940500  | -5.13513000         |
| C                           | -5.75556000                            | 7.12493500  | -3.11787200         | C                         | -4.85708800                            | 6.86089000  | -3.99431200         |
| H                           | -3.78073900                            | 7.20002400  | -3.96835400         | C                         | -6.51210700                            | 5.66056900  | -5.30953600         |
| C                           | -7.43349500                            | 5.96005500  | -4.42089900         | C                         | -5.84015700                            | 7.18001800  | -3.06194700         |
| H                           | -6.77780400                            | 5.14109300  | -6.29118300         | H                         | -3.84033000                            | 7.21276400  | -3.86135600         |
| C                           | -7.07095400                            | 6.68100500  | -3.27688600         | C                         | -7.48439900                            | 5.97117600  | -4.36483600         |
| H                           | -5.46856900                            | 7.68992500  | -2.23599600         | H                         | -6.77563100                            | 5.07750600  | -6.18350400         |
| H                           | -8.45439300                            | 5.60998200  | -4.54482500         | C                         | -7.15269400                            | 6.73470100  | -3.24048700         |
| H                           | -7.81419900                            | 6.89479600  | -2.51308500         | H                         | -5.57797900                            | 7.78069100  | -2.19578300         |
| N                           | -0.52659900                            | 8.46232800  | -5.66416600         | H                         | -8.50347000                            | 5.62217200  | -4.50665600         |
| S                           | -0.69933500                            | 8.11557600  | -4.08367700         | H                         | -7.91670700                            | 6.98266700  | -2.50813200         |
| S                           | -1.08423600                            | 9.80659200  | -6.40311700         | N                         | -0.61203600                            | 8.23080100  | -5.74587200         |
| C                           | 0.65580200                             | 9.09663200  | -3.24246000         | S                         | -0.67351600                            | 8.22763500  | -4.10242000         |
| C                           | -2.84567200                            | 9.37521600  | -6.87546200         | S                         | -1.06438600                            | 9.46710400  | -6.71892400         |
| F                           | 0.41371400                             | 10.40344300 | -3.29193500         | C                         | 0.63786600                             | 9.48131800  | -3.58021700         |
| F                           | 1.82892800                             | 8.84229400  | -3.83587500         | C                         | -2.91849600                            | 9.26025200  | -6.94869800         |
| F                           | 0.72612400                             | 8.70914600  | -1.96119000         | F                         | 0.10800600                             | 10.68914000 | -3.43071800         |
| F                           | -3.56606600                            | 9.00238600  | -5.81571800         | F                         | 1.61764400                             | 9.52566000  | -4.48725600         |
| F                           | -2.85373200                            | 8.36572900  | -7.77307000         | F                         | 1.14456400                             | 9.07455000  | -2.40962200         |
| F                           | -3.42035700                            | 10.44028500 | -7.44163700         | F                         | -3.54192900                            | 9.06858900  | -5.78896100         |
| O                           | -0.25669400                            | 6.71932100  | -3.93331200         | F                         | -3.15790100                            | 8.20399200  | -7.74867600         |
| O                           | -1.94619400                            | 8.55535800  | -3.44757000         | F                         | -3.40078300                            | 10.35637700 | -7.53832600         |
| O                           | -1.21363100                            | 10.97750800 | -5.53564200         | O                         | -0.12593200                            | 6.92050000  | -3.72156800         |
| O                           | -0.39593100                            | 9.89131200  | -7.69205800         | O                         | -1.92462300                            | 8.71161900  | -3.51700700         |
|                             |                                        |             |                     | O                         | -0.90409400                            | 10.77528100 | -6.08596300         |
|                             |                                        |             |                     | O                         | -0.50755100                            | 9.17129500  | -8.03878900         |
| <b>TS<sub>Kp1-Gp2</sub></b> | <b>E<sub>M06(dichloroethane)</sub></b> | <b>=</b>    | <b>-3203.224906</b> |                           |                                        |             |                     |
| C                           | -4.11610900                            | 5.78317700  | -6.08126700         | <b>TS<sub>Fp-Lp</sub></b> | <b>E<sub>M06(dichloroethane)</sub></b> | <b>=</b>    | <b>-1375.938101</b> |
| C                           | -4.20232400                            | 5.38931600  | -7.50597300         | C                         | -4.31393500                            | 5.33298300  | -6.33114500         |
| C                           | -5.25788400                            | 5.90504500  | -8.42123300         | C                         | -4.57016400                            | 4.09972400  | -7.05746000         |
| O                           | -6.25694200                            | 6.51550300  | -8.10655400         | C                         | -4.71517500                            | 4.26823000  | -8.53409900         |
| O                           | -4.97210800                            | 5.59087100  | -9.71435100         | C                         | -5.70554600                            | 3.78052600  | -9.05728100         |
| C                           | -5.90880700                            | 6.09685400  | -10.67951600        | O                         | -3.77616600                            | 4.97808200  | -9.12656000         |
| C                           | -2.04914600                            | 5.57666500  | -6.70236900         | O                         | -3.91442300                            | 5.16054300  | -10.55876700        |
| C                           | -2.77390000                            | 5.37296200  | -7.91056000         | C                         | -2.73621900                            | 4.19302500  | -4.82004800         |
| C                           | -2.08844700                            | 5.26365700  | -9.10688300         | C                         | -1.53470900                            | 3.50772100  | -5.13318200         |
| C                           | -0.66886600                            | 5.36242800  | -9.12890700         | C                         | -0.95074400                            | 2.67541400  | -4.17035400         |
| C                           | 0.05244700                             | 5.51278900  | -7.97136200         | C                         | -1.52609300                            | 2.51123300  | -2.91164400         |
| C                           | -0.60096100                            | 5.64678200  | -6.67358700         | C                         | -2.72665600                            | 3.16849900  | -2.61797600         |
| C                           | 0.12571500                             | 4.88816100  | -5.56248700         | C                         | -3.34185100                            | 3.98699300  | -3.56252800         |
| H                           | -2.63476700                            | 5.12395600  | -10.03275200        | C                         | -0.96313300                            | 3.57034300  | -6.49023500         |
| H                           | -0.15622500                            | 5.30451800  | -10.08400200        | H                         | -0.03260400                            | 2.15027300  | -4.42373000         |
| H                           | 1.13830800                             | 5.54993900  | -8.00214200         | H                         | -1.04829400                            | 1.88216400  | -2.16736300         |
| H                           | -0.46861500                            | 6.82457600  | -6.33562100         | H                         | -3.18858600                            | 3.04882500  | -1.64196300         |
| H                           | 1.17204700                             | 5.21028500  | -5.40884500         | H                         | -4.25586600                            | 4.52203600  | -3.32578200         |
| N                           | -2.84097700                            | 5.81333500  | -5.64191500         | H                         | 0.01741900                             | 3.06333500  | -6.60908300         |
| O                           | -0.35574500                            | 3.96458100  | -4.95064200         | N                         | -3.24606500                            | 5.19860100  | -5.61227500         |
| C                           | -4.39364400                            | 1.34898700  | -6.33903300         | O                         | -1.51376800                            | 4.10075100  | -7.43927900         |
| C                           | -4.56821900                            | -0.86116000 | -5.93406500         |                           |                                        |             |                     |

|                                                           |             |             |              |                                                                            |             |             |              |
|-----------------------------------------------------------|-------------|-------------|--------------|----------------------------------------------------------------------------|-------------|-------------|--------------|
| C                                                         | -5.12810100 | 0.22030100  | -5.96794900  | H                                                                          | -6.86443100 | -0.26158300 | -8.61221500  |
| C                                                         | -5.80399200 | -1.92242300 | -6.15351400  | H                                                                          | -6.76923100 | 1.35474700  | -7.86528300  |
| C                                                         | -5.17031100 | -1.79463100 | -4.95674500  | H                                                                          | -8.07076500 | 0.23644400  | -7.39187900  |
| H                                                         | -6.27824400 | -2.77458300 | -6.61538200  | H                                                                          | -3.51081200 | 4.79928800  | -11.57283600 |
| H                                                         | -4.97433200 | -2.51661300 | -4.17920100  | H                                                                          | -4.98443900 | 5.52800600  | -10.84374300 |
| C                                                         | -6.38019000 | -0.39876900 | -8.05999500  | H                                                                          | -4.87926800 | 3.76043300  | -11.04368100 |
| C                                                         | -3.99639000 | 0.07523100  | -3.74781500  | C                                                                          | -4.84343900 | 6.47176100  | -6.41190000  |
| N                                                         | -4.76939000 | -0.47553800 | -4.85878500  | C                                                                          | -5.68793000 | 7.00095700  | -5.41837900  |
| N                                                         | -5.76628800 | -0.68075100 | -6.76003100  | C                                                                          | -4.68284000 | 7.16874000  | -7.62323200  |
| Au                                                        | -4.78644100 | 2.19960900  | -6.41575300  | C                                                                          | -6.37696700 | 8.18792100  | -5.64432700  |
| H                                                         | -4.25242100 | -0.46289300 | -2.83299600  | H                                                                          | -5.80454100 | 6.46141800  | -4.48466400  |
| H                                                         | -4.24102500 | 1.13014400  | -3.62891900  | C                                                                          | -5.35493800 | 8.36934400  | -7.83290100  |
| H                                                         | -2.92502500 | -0.01853000 | -3.94377800  | H                                                                          | -4.00142700 | 6.80007000  | -8.38329800  |
| H                                                         | -6.01789400 | -1.12103000 | -8.79546700  | C                                                                          | -6.21086400 | 8.87532900  | -6.85060300  |
| H                                                         | -6.10814300 | 0.60826000  | -8.37704900  | H                                                                          | -7.04255600 | 8.57946500  | -4.88101900  |
| H                                                         | -7.46803800 | -0.46984000 | -7.97870800  | H                                                                          | -5.21048000 | 8.91181700  | -8.76225500  |
| H                                                         | -2.99667500 | 5.65597700  | -10.86970200 | H                                                                          | -6.74570700 | 9.80451500  | -7.02399600  |
| H                                                         | -4.78760700 | 5.78402100  | -10.76519800 |                                                                            |             |             |              |
| H                                                         | -4.02518100 | 4.19215800  | -11.05194400 |                                                                            |             |             |              |
| C                                                         | -4.92364600 | 6.63476600  | -6.60803800  | <b>TS</b> <sub>Lp-Ap</sub> $E_{M06}(\text{dichloroethane}) = -1375.961998$ |             |             |              |
| C                                                         | -6.15755700 | 6.70018300  | -7.27988700  | C                                                                          | -3.86094800 | 5.13105100  | -6.11237700  |
| C                                                         | -4.30719100 | 7.81598800  | -6.15784100  | C                                                                          | -3.31289900 | 4.78351700  | -7.44402800  |
| C                                                         | -6.75811500 | 7.93558900  | -7.51089600  | C                                                                          | -3.78297900 | 5.39798000  | -8.76432100  |
| H                                                         | -6.65402300 | 5.79185500  | -7.60904200  | O                                                                          | -4.19136600 | 4.76977300  | -9.71804500  |
| C                                                         | -4.90807000 | 9.04564200  | -6.40085100  | O                                                                          | -3.60846400 | 6.71149700  | -8.70324100  |
| H                                                         | -3.35668300 | 7.75529300  | -5.63766500  | C                                                                          | -3.97010500 | 7.45897000  | -9.89263700  |
| C                                                         | -6.13294800 | 9.10740600  | -7.07688800  | C                                                                          | -2.32916700 | 3.77606800  | -4.86337000  |
| H                                                         | -7.71338800 | 7.98367300  | -8.02430800  | C                                                                          | -1.87774400 | 2.91633000  | -5.91972800  |
| H                                                         | -4.42572400 | 9.95847100  | -6.06506000  | C                                                                          | -1.20385100 | 1.71301100  | -5.62526300  |
| H                                                         | -6.60133700 | 10.07004700 | -7.25996700  | C                                                                          | -0.85969000 | 1.42169500  | -4.31732200  |
|                                                           |             |             |              | C                                                                          | -1.21010200 | 2.30982800  | -3.27783600  |
|                                                           |             |             |              | C                                                                          | -1.94142500 | 3.45391600  | -3.54109000  |
|                                                           |             |             |              | C                                                                          | -2.07265500 | 3.35801700  | -7.27733000  |
| <b>Lp</b> $E_{M06}(\text{dichloroethane}) = -1375.983572$ |             |             |              | H                                                                          | -0.90122400 | 1.05784500  | -6.43772000  |
| C                                                         | -4.08380100 | 5.24389600  | -6.12483800  | H                                                                          | -0.29952000 | 0.51949600  | -4.09272800  |
| C                                                         | -3.73903000 | 4.20778000  | -7.19468700  | H                                                                          | -0.92369900 | 2.07712200  | -2.25669300  |
| C                                                         | -4.44987400 | 4.38768800  | -8.51278000  | H                                                                          | -2.27140500 | 4.11202600  | -2.74418900  |
| O                                                         | -5.66237500 | 4.33001500  | -8.57459400  | H                                                                          | -1.76559800 | 2.75446700  | -8.13319000  |
| O                                                         | -3.63970600 | 4.56590300  | -9.56365300  | H                                                                          | -3.27658700 | 4.76056300  | -5.00467100  |
| C                                                         | -4.30791500 | 4.66983100  | -10.84181400 | O                                                                          | -1.90653100 | 4.72748800  | -7.46781700  |
| C                                                         | -2.81580800 | 4.08516700  | -4.48490100  | C                                                                          | -6.00837900 | 1.46503300  | -7.47952100  |
| C                                                         | -1.63013600 | 3.68932600  | -5.20015300  | C                                                                          | -7.64365700 | 0.00363900  | -7.96956600  |
| C                                                         | -0.62580800 | 2.91699200  | -4.54445200  | C                                                                          | -7.93753600 | 0.56016400  | -6.76332400  |
| C                                                         | -0.84282800 | 2.42825000  | -3.27664900  | H                                                                          | -8.16702600 | -0.73691200 | -8.55410100  |
| C                                                         | -2.04623400 | 2.75149300  | -2.60402500  | H                                                                          | -8.77149300 | 0.40276200  | -6.09725900  |
| C                                                         | -2.99541500 | 3.57777800  | -3.17836400  | C                                                                          | -5.78075100 | 0.22909600  | -9.64681500  |
| C                                                         | -1.40618300 | 4.03001100  | -6.54981300  | C                                                                          | -6.85584400 | 2.31238500  | -5.28908800  |
| H                                                         | 0.29458600  | 2.68840600  | -5.07559700  | N                                                                          | -6.92273800 | 1.45483100  | -6.47787700  |
| H                                                         | -0.09286100 | 1.81674200  | -2.78626000  | N                                                                          | -6.45784400 | 0.57573000  | -8.39603500  |
| H                                                         | -2.20817700 | 2.37667600  | -1.59716900  | Au                                                                         | -4.37326000 | 2.66544700  | -7.51695000  |
| H                                                         | -3.88019200 | 3.88607700  | -2.63169000  | H                                                                          | -6.90175000 | 3.36317100  | -5.58606300  |
| H                                                         | -0.39815300 | 4.00448400  | -6.96390600  | H                                                                          | -5.92237800 | 2.12843400  | -4.75288700  |
| N                                                         | -3.66502700 | 5.06427800  | -4.91774800  | H                                                                          | -7.69990000 | 2.07675300  | -4.63990900  |
| O                                                         | -2.28267100 | 4.34759100  | -7.43169000  | H                                                                          | -6.52461100 | 0.12496200  | -10.43936600 |
| C                                                         | -5.08287300 | 0.38709000  | -6.09980800  | H                                                                          | -5.23316100 | -0.71011600 | -9.53043900  |
| C                                                         | -6.36973600 | -1.46423800 | -6.03759600  | H                                                                          | -5.08868300 | 1.02986700  | -9.90945500  |
| C                                                         | -5.37785500 | -1.62597200 | -5.12353200  | H                                                                          | -3.73575900 | 8.49587100  | -9.65844500  |
| H                                                         | -7.18210200 | -2.11447100 | -6.32317300  | H                                                                          | -5.03677100 | 7.33338900  | -10.09363100 |
| H                                                         | -5.16219300 | -2.44052500 | -4.44959600  | H                                                                          | -3.38806500 | 7.10513200  | -10.74615400 |
| C                                                         | -7.02280800 | 0.30832400  | -7.69256500  | C                                                                          | -5.13327900 | 5.89182200  | -5.99637800  |
| C                                                         | -3.45839000 | -0.22317900 | -4.29954700  | C                                                                          | -5.33099300 | 6.70249800  | -4.86563600  |
| N                                                         | -4.59647600 | -0.48361400 | -5.17842700  | C                                                                          | -6.16173800 | 5.79533300  | -6.95186100  |
| N                                                         | -6.17452000 | -0.22536100 | -6.62456000  | C                                                                          | -6.51836100 | 7.41227100  | -4.70523800  |
| Au                                                        | -4.36118400 | 2.23999700  | -6.58908200  | H                                                                          | -4.54192000 | 6.76975500  | -4.12514900  |
| H                                                         | -3.79654600 | 0.23759400  | -3.36722100  | C                                                                          | -7.35479400 | 6.49730300  | -6.77901300  |
| H                                                         | -2.76338600 | 0.45268300  | -4.79854100  | H                                                                          | -6.05613400 | 5.15618700  | -7.82324200  |
| H                                                         | -2.95264700 | -1.16610900 | -4.08111500  |                                                                            |             |             |              |

|                                                                            |             |             |              |                                                           |             |             |              |
|----------------------------------------------------------------------------|-------------|-------------|--------------|-----------------------------------------------------------|-------------|-------------|--------------|
| C                                                                          | -7.53511400 | 7.31215500  | -5.65926500  | H                                                         | -6.70372200 | -1.73400300 | -7.82374100  |
| H                                                                          | -6.65072400 | 8.04555700  | -3.83302000  | H                                                         | -7.65880200 | -1.17067300 | -5.28006200  |
| H                                                                          | -8.14271300 | 6.40553900  | -7.52104700  | C                                                         | -5.28112000 | 0.38373100  | -8.94546800  |
| H                                                                          | -8.46108800 | 7.86475500  | -5.53052100  | C                                                         | -7.04325600 | 1.42248300  | -4.43837300  |
| <b>PQ<sup>p</sup></b> $E_{M06}(\text{dichloroethane}) = -935.650385$       |             |             |              | N                                                         | -6.68810300 | 0.72096500  | -5.67271800  |
| C                                                                          | -3.40133300 | 4.94683400  | 6.12192900   | N                                                         | -5.96039400 | 0.28912900  | -7.65407400  |
| C                                                                          | -2.18346700 | 4.67319300  | 6.97041800   | Au                                                        | -5.18881100 | 3.16129000  | -6.77587900  |
| C                                                                          | -2.39041300 | 4.00434400  | 8.30389000   | H                                                         | -6.28539900 | 2.17416800  | -4.21355100  |
| O                                                                          | -3.20437900 | 3.12211200  | 8.46701200   | H                                                         | -7.08782600 | 0.70019300  | -3.62040300  |
| O                                                                          | -1.55173600 | 4.46370700  | 9.24755600   | H                                                         | -8.01521100 | 1.91161000  | -4.54781200  |
| C                                                                          | -1.67133400 | 3.81499000  | 10.52754000  | H                                                         | -4.38612300 | -0.24458500 | -8.94554400  |
| C                                                                          | -2.21331800 | 4.50555100  | 4.14741700   | H                                                         | -4.99487100 | 1.42097300  | -9.11898700  |
| C                                                                          | -0.98780200 | 4.20660700  | 4.78537800   | H                                                         | -5.95926400 | 0.05741800  | -9.73779300  |
| C                                                                          | 0.09906400  | 3.75536600  | 4.03477500   | H                                                         | -5.23748400 | 6.92818000  | -10.67533300 |
| C                                                                          | -0.00450300 | 3.62873000  | 2.64895200   | H                                                         | -3.93328400 | 5.69267200  | -10.71818400 |
| C                                                                          | -1.20741000 | 3.94840400  | 2.00931700   | H                                                         | -3.59242900 | 7.31385600  | -10.06416200 |
| C                                                                          | -2.30313300 | 4.37990500  | 2.75224800   | C                                                         | -4.82505100 | 5.56468500  | -4.32902500  |
| C                                                                          | -0.91587900 | 4.34919600  | 6.25060200   | C                                                         | -4.34998600 | 4.40592500  | -3.69538000  |
| H                                                                          | 1.03242900  | 3.51468900  | 4.53867700   | C                                                         | -5.70412200 | 6.41005100  | -3.63719300  |
| H                                                                          | 0.84948000  | 3.28914000  | 2.06992500   | C                                                         | -4.76518900 | 4.08940300  | -2.40077300  |
| H                                                                          | -1.28973200 | 3.85459500  | 0.93004400   | H                                                         | -3.64480300 | 3.76431100  | -4.21620600  |
| H                                                                          | -3.25028000 | 4.62003700  | 2.27954000   | C                                                         | -6.11972100 | 6.09089900  | -2.34422200  |
| H                                                                          | -0.15903000 | 3.76745900  | 6.77791500   | H                                                         | -6.08304000 | 7.30458500  | -4.12373500  |
| N                                                                          | -3.36788700 | 4.89330000  | 4.83229900   | C                                                         | -5.65365700 | 4.92900400  | -1.72373300  |
| O                                                                          | -1.14049500 | 5.64411000  | 6.83208100   | H                                                         | -4.38137700 | 3.19608600  | -1.91573800  |
| H                                                                          | -0.93699000 | 4.30143500  | 11.16964800  | H                                                         | -6.81190700 | 6.74615800  | -1.82334000  |
| H                                                                          | -2.68190300 | 3.94349800  | 10.92509900  | H                                                         | -5.97456600 | 4.68417000  | -0.71543300  |
| H                                                                          | -1.46016400 | 2.74577700  | 10.43639200  | <b>Mp</b> $E_{M06}(\text{dichloroethane}) = -1375.945061$ |             |             |              |
| C                                                                          | -4.65144500 | 5.37859200  | 6.78298200   | C                                                         | -3.00135900 | 4.47753000  | -6.10010100  |
| C                                                                          | -5.88743600 | 5.17903800  | 6.14571600   | C                                                         | -3.36873100 | 3.92421500  | -7.37918100  |
| C                                                                          | -4.62322300 | 6.03883200  | 8.02275600   | C                                                         | -2.66739900 | 4.49872800  | -8.55109300  |
| C                                                                          | -7.06631000 | 5.61459100  | 6.74295100   | O                                                         | -1.72761700 | 3.86370000  | -8.98723600  |
| H                                                                          | -5.90041500 | 4.67826200  | 5.18359300   | O                                                         | -3.17084100 | 5.62511300  | -9.03174100  |
| C                                                                          | -5.80491900 | 6.48267000  | 8.61445100   | C                                                         | -2.49683500 | 6.16622600  | -10.19868500 |
| H                                                                          | -3.67458900 | 6.23434100  | 8.51583400   | C                                                         | -1.74268600 | 6.21774100  | -5.06924800  |
| C                                                                          | -7.02972700 | 6.26671800  | 7.97997000   | C                                                         | -0.36201500 | 6.45908700  | -4.83286700  |
| H                                                                          | -8.01753700 | 5.44449600  | 6.24586000   | C                                                         | 0.02925700  | 7.39701900  | -3.87570800  |
| H                                                                          | -5.76774200 | 7.00099400  | 9.56864200   | C                                                         | -0.92798200 | 8.09899100  | -3.14193000  |
| H                                                                          | -7.95145300 | 6.60620300  | 8.44482300   | C                                                         | -2.28751200 | 7.85146200  | -3.36335700  |
| <b>TS<sub>Ep1-Mp</sub></b> $E_{M06}(\text{dichloroethane}) = -1375.925418$ |             |             |              | C                                                         | -2.70042400 | 6.90865400  | -4.30186600  |
| C                                                                          | -4.38776100 | 5.90463300  | -5.71332100  | C                                                         | 0.61783500  | 5.62138700  | -5.54016300  |
| C                                                                          | -4.45105100 | 5.05800900  | -6.79643400  | H                                                         | 1.08833000  | 7.55696700  | -3.69044700  |
| C                                                                          | -3.88708400 | 5.55107100  | -8.08376000  | H                                                         | -0.62001700 | 8.82197200  | -2.39362700  |
| O                                                                          | -2.71940500 | 5.39731800  | -8.37606700  | H                                                         | -3.03618500 | 8.39565200  | -2.79542000  |
| O                                                                          | -4.81773500 | 6.11066300  | -8.86812200  | H                                                         | -3.75486700 | 6.74004400  | -4.49043000  |
| C                                                                          | -4.35543500 | 6.53804900  | -10.16872500 | H                                                         | 1.67716400  | 5.93885800  | -5.46560300  |
| C                                                                          | -3.11713400 | 7.93419900  | -5.12619400  | N                                                         | -2.11213600 | 5.44037300  | -6.15169100  |
| C                                                                          | -3.46572900 | 9.31172300  | -5.13349100  | O                                                         | 0.30456700  | 4.62646900  | -6.17301600  |
| C                                                                          | -2.69013500 | 10.26859400 | -4.43908200  | C                                                         | -5.59607800 | 0.54681500  | -7.80019300  |
| C                                                                          | -1.59812800 | 9.81854900  | -3.72918500  | C                                                         | -6.66366900 | -1.36380300 | -7.25702500  |
| C                                                                          | -1.26795400 | 8.43679600  | -3.71122700  | C                                                         | -6.71809800 | -1.23326800 | -8.61062800  |
| C                                                                          | -2.00337700 | 7.48314200  | -4.39501600  | H                                                         | -7.04514100 | -2.13489500 | -6.60575200  |
| C                                                                          | -4.62215000 | 9.42651500  | -5.92181300  | H                                                         | -7.16727300 | -1.86143200 | -9.36430500  |
| H                                                                          | -2.96381100 | 11.31861500 | -4.45867800  | C                                                         | -5.63550300 | -0.06104500 | -5.36857400  |
| H                                                                          | -0.98406600 | 10.51744400 | -3.17155700  | C                                                         | -5.92891800 | 0.46063200  | -10.28491500 |
| H                                                                          | -0.40394400 | 8.11486300  | -3.13729900  | N                                                         | -6.05699100 | -0.06134700 | -8.92380100  |
| H                                                                          | -1.73939600 | 6.43249400  | -4.38638900  | N                                                         | -5.97796300 | -0.26456100 | -6.77821700  |
| H                                                                          | -5.12905400 | 10.34410800 | -6.22316000  | Au                                                        | -4.51083300 | 2.29083000  | -7.62504000  |
| N                                                                          | -3.89218300 | 7.17134900  | -5.94687900  | H                                                         | -5.15323700 | 1.22625900  | -10.30014800 |
| O                                                                          | -5.08724000 | 8.32130300  | -6.36454900  | H                                                         | -6.87802700 | 0.89439600  | -10.61143600 |
| C                                                                          | -5.99323700 | 1.26274700  | -6.70809800  | H                                                         | -5.64504700 | -0.35218200 | -10.95703800 |
| C                                                                          | -6.62494300 | -0.84406600 | -7.21870500  | H                                                         | -4.67744400 | -0.53650400 | -5.14179300  |
| C                                                                          | -7.08768800 | -0.56986900 | -5.97074300  | H                                                         | -6.41883700 | -0.50052300 | -4.74786800  |
|                                                                            |             |             |              | H                                                         | -5.56665300 | 1.00663800  | -5.15734300  |

|                           |                                          |             |              |                           |                                          |             |              |
|---------------------------|------------------------------------------|-------------|--------------|---------------------------|------------------------------------------|-------------|--------------|
| H                         | -3.08629100                              | 7.03307800  | -10.49257400 | H                         | -7.36788700                              | 6.48822600  | -3.63808200  |
| H                         | -2.46957600                              | 5.42092800  | -10.99712400 |                           |                                          |             |              |
| H                         | -1.47841600                              | 6.45735400  | -9.93224000  | <b>Np</b>                 | $E_{M06(dichloroethane)} = -1375.958352$ |             |              |
| C                         | -3.53771900                              | 3.88889600  | -4.83760200  | C                         | -4.27711500                              | 5.66029700  | -6.75996700  |
| C                         | -2.63799200                              | 3.36231100  | -3.90047400  | C                         | -3.82196100                              | 4.72460500  | -7.78526100  |
| C                         | -4.91645800                              | 3.83465800  | -4.58769300  | C                         | -3.71511900                              | 5.24963300  | -9.18829400  |
| C                         | -3.11557900                              | 2.77700400  | -2.72798200  | O                         | -4.57875100                              | 5.03178400  | -10.01031100 |
| H                         | -1.57178600                              | 3.39981700  | -4.10652300  | O                         | -2.58829000                              | 5.94393600  | -9.41567900  |
| C                         | -5.38930800                              | 3.26369800  | -3.40463500  | C                         | -2.44173200                              | 6.45232800  | -10.76264600 |
| H                         | -5.61334300                              | 4.24780100  | -5.31217600  | C                         | -1.84324900                              | 5.53783800  | -5.93759500  |
| C                         | -4.48982300                              | 2.73001600  | -2.47667700  | C                         | -1.83009100                              | 5.06247200  | -4.60323000  |
| H                         | -2.41552400                              | 2.36003900  | -2.01009300  | C                         | -0.62006900                              | 5.12613300  | -3.89363600  |
| H                         | -6.45700700                              | 3.24186000  | -3.20536800  | C                         | 0.54403100                               | 5.61569300  | -4.48176000  |
| H                         | -4.85873300                              | 2.28388700  | -1.55765500  | C                         | 0.51744800                               | 6.04031100  | -5.81239900  |
|                           |                                          |             |              | C                         | -0.67209600                              | 5.99927100  | -6.54115700  |
| <b>TS<sub>Mp-Np</sub></b> | $E_{M06(dichloroethane)} = -1375.946191$ |             |              | C                         | -2.96941700                              | 4.40231500  | -3.93358400  |
| C                         | -3.83721900                              | 5.06223300  | -7.34329500  | H                         | -0.59752200                              | 4.76587700  | -2.86787200  |
| C                         | -3.94531400                              | 4.02222100  | -8.36447700  | H                         | 1.46686400                               | 5.65489400  | -3.91212000  |
| C                         | -4.21641100                              | 4.46136200  | -9.75357600  | H                         | 1.42200700                               | 6.40996500  | -6.28541600  |
| O                         | -5.39427200                              | 4.51807900  | -10.05630400 | H                         | -0.72028600                              | 6.33112400  | -7.57258100  |
| O                         | -3.17694800                              | 4.69521800  | -10.53635800 | H                         | -2.76368600                              | 4.11726600  | -2.88115900  |
| C                         | -3.49978800                              | 5.07187200  | -11.90147500 | N                         | -3.00023100                              | 5.55913600  | -6.72951900  |
| C                         | -1.48569100                              | 5.77170300  | -6.98818700  | O                         | -4.04806900                              | 4.13482100  | -4.43891700  |
| C                         | -1.00339700                              | 5.23527900  | -5.75991000  | C                         | -4.67463800                              | 0.72986700  | -7.16272700  |
| C                         | 0.17296400                               | 5.77390800  | -5.21162400  | C                         | -5.22959000                              | -1.21741700 | -6.16281800  |
| C                         | 0.86622800                               | 6.80724900  | -5.83458700  | C                         | -5.07555700                              | -1.46875000 | -7.48838100  |
| C                         | 0.39831400                               | 7.30577000  | -7.05406700  | H                         | -5.49661600                              | -1.86838600 | -5.34474800  |
| C                         | -0.75192800                              | 6.77788700  | -7.63593200  | H                         | -5.17702500                              | -2.38279200 | -8.05278600  |
| C                         | -1.60907700                              | 4.10426300  | -5.03667700  | C                         | -5.06781700                              | 0.79747400  | -4.68068900  |
| H                         | 0.54633700                               | 5.36079700  | -4.27742100  | C                         | -4.45789900                              | -0.12137800 | -9.51319900  |
| H                         | 1.76874300                               | 7.20893600  | -5.38568300  | N                         | -4.73917700                              | -0.26567500 | -8.08518500  |
| H                         | 0.93698100                               | 8.10034700  | -7.56148100  | N                         | -4.98127700                              | 0.13285300  | -5.98111800  |
| H                         | -1.11465600                              | 7.14463700  | -8.59033200  | Au                        | -4.22379500                              | 2.71176200  | -7.48308600  |
| H                         | -1.05639800                              | 3.81818500  | -4.11838900  | H                         | -4.47391000                              | 0.93686300  | -9.77426500  |
| N                         | -2.62404300                              | 5.32641700  | -7.64743700  | H                         | -5.22592200                              | -0.64522300 | -10.08720800 |
| O                         | -2.61222800                              | 3.48446600  | -5.35745600  | H                         | -3.47523700                              | -0.54044300 | -9.74748000  |
| C                         | -4.00225200                              | 0.10024200  | -7.24580700  | H                         | -4.36143600                              | 0.33430200  | -3.98599400  |
| C                         | -4.07379300                              | -2.15381200 | -7.21221400  | H                         | -6.08269600                              | 0.69945500  | -4.28551800  |
| C                         | -4.12573500                              | -1.72176900 | -5.92405000  | H                         | -4.82597000                              | 1.85434100  | -4.79106300  |
| H                         | -4.07534200                              | -3.15029300 | -7.62611800  | H                         | -1.47653900                              | 6.95744000  | -10.77916200 |
| H                         | -4.18965600                              | -2.26983000 | -4.99684400  | H                         | -3.25022700                              | 7.15062900  | -10.99212100 |
| C                         | -3.92117500                              | -1.07118800 | -9.46622700  | H                         | -2.46283000                              | 5.62782300  | -11.47924000 |
| C                         | -4.17484400                              | 0.52174300  | -4.78186900  | C                         | -5.39789400                              | 6.26894100  | -6.13895900  |
| N                         | -4.07693100                              | -0.34102800 | -5.96311100  | C                         | -6.66207500                              | 6.04989200  | -6.72319400  |
| N                         | -3.99888300                              | -1.02435000 | -8.00697700  | C                         | -5.25927200                              | 7.07356200  | -4.98893500  |
| Au                        | -3.94548400                              | 2.07060200  | -7.83961000  | C                         | -7.78636100                              | 6.63198700  | -6.14887300  |
| H                         | -3.55121200                              | 1.40696600  | -4.91430300  | H                         | -6.73436900                              | 5.43391500  | -7.61507100  |
| H                         | -3.83061300                              | -0.04001500 | -3.91133300  | C                         | -6.38841500                              | 7.65202000  | -4.42831300  |
| H                         | -5.21369500                              | 0.82737700  | -4.62909100  | H                         | -4.27675900                              | 7.22996200  | -4.55456000  |
| H                         | -4.79395200                              | -1.59488400 | -9.86501800  | C                         | -7.64725000                              | 7.42902400  | -5.00683000  |
| H                         | -3.00860000                              | -1.58975100 | -9.77212800  | H                         | -8.76648300                              | 6.47232200  | -6.58644000  |
| H                         | -3.90491200                              | -0.05198800 | -9.85114800  | H                         | -6.30045800                              | 8.27408500  | -3.54334500  |
| H                         | -2.53791700                              | 5.20973200  | -12.39251200 | H                         | -8.52699200                              | 7.88453500  | -4.56139300  |
| H                         | -4.07918400                              | 5.99794600  | -11.90812600 |                           |                                          |             |              |
| H                         | -4.07466400                              | 4.27675400  | -12.38193400 | <b>TS<sub>Np-Op</sub></b> | $E_{M06(dichloroethane)} = -1375.949706$ |             |              |
| C                         | -4.76982900                              | 5.46472400  | -6.31721500  | C                         | -4.55827900                              | 5.68818600  | -7.19589200  |
| C                         | -6.07534300                              | 4.94383500  | -6.37292700  | C                         | -3.95530800                              | 4.39360900  | -7.45294700  |
| C                         | -4.40817800                              | 6.37089300  | -5.30261700  | C                         | -3.60637800                              | 4.08737700  | -8.88841000  |
| C                         | -7.00608800                              | 5.30982300  | -5.40504100  | O                         | -2.51991700                              | 4.26528000  | -9.38598200  |
| H                         | -6.34915800                              | 4.27146600  | -7.18125700  | O                         | -4.67008000                              | 3.54946200  | -9.51575700  |
| C                         | -5.34475100                              | 6.73322300  | -4.34269300  | C                         | -4.44570500                              | 3.16863300  | -10.89090200 |
| H                         | -3.40402000                              | 6.78094200  | -5.27292500  | C                         | -2.54864400                              | 5.77188500  | -5.75368500  |
| C                         | -6.63992900                              | 6.19997600  | -4.39089800  | C                         | -3.27144000                              | 5.93404700  | -4.54721200  |
| H                         | -8.01549900                              | 4.91259700  | -5.44472500  | C                         | -2.57664000                              | 6.07936600  | -3.32708300  |
| H                         | -5.07353300                              | 7.43067100  | -3.55626500  | C                         | -1.19096900                              | 6.04051300  | -3.30718400  |

|           |                                                 |             |              |                           |                                                 |             |              |
|-----------|-------------------------------------------------|-------------|--------------|---------------------------|-------------------------------------------------|-------------|--------------|
| C         | -0.48854800                                     | 5.84751600  | -4.50843100  | H                         | -4.34715600                                     | -0.90277600 | -2.49496300  |
| C         | -1.15678600                                     | 5.71697000  | -5.72676600  | H                         | -6.19518500                                     | -1.66747300 | -4.41818700  |
| C         | -4.70597100                                     | 5.85328100  | -4.53600000  | C                         | -3.01367800                                     | 1.45669900  | -3.15066700  |
| H         | -3.13990300                                     | 6.21323000  | -2.40654600  | C                         | -6.34574000                                     | 0.10936000  | -6.55803400  |
| H         | -0.65224400                                     | 6.15542800  | -2.37262300  | N                         | -5.49680900                                     | 0.14640900  | -5.36521900  |
| H         | 0.59676700                                      | 5.80919800  | -4.49299900  | N                         | -4.06731600                                     | 0.74553700  | -3.86884900  |
| H         | -0.62228500                                     | 5.58177800  | -6.66123800  | Au                        | -4.14147400                                     | 2.75195300  | -6.23085800  |
| H         | -5.21760400                                     | 5.93871000  | -3.56687600  | H                         | -6.01500900                                     | 0.87568600  | -7.25975500  |
| N         | -3.20521500                                     | 5.66261300  | -6.98718800  | H                         | -7.38674300                                     | 0.29575700  | -6.28015800  |
| O         | -5.43806800                                     | 5.65846200  | -5.53088600  | H                         | -6.26240500                                     | -0.87205200 | -7.03122800  |
| C         | -4.54336000                                     | 0.97969200  | -5.17652600  | H                         | -2.09462500                                     | 0.86366800  | -3.14877700  |
| C         | -4.24142900                                     | -1.02852900 | -4.18689100  | H                         | -3.33045100                                     | 1.64121900  | -2.12056500  |
| C         | -5.51879200                                     | -0.63989900 | -3.93924500  | H                         | -2.82722700                                     | 2.40770400  | -3.65053500  |
| H         | -3.70066300                                     | -1.91447900 | -3.89187700  | H                         | -1.93306100                                     | 4.12180600  | -11.57012600 |
| H         | -6.31315100                                     | -1.12413700 | -3.39258000  | H                         | -3.72380500                                     | 4.26657600  | -11.59893100 |
| C         | -2.27230800                                     | -0.06634900 | -5.40487600  | H                         | -2.97065600                                     | 2.70348200  | -11.19073600 |
| C         | -6.95116300                                     | 1.32350300  | -4.56702500  | C                         | -4.72222200                                     | 6.67043200  | -8.31927200  |
| N         | -5.68483400                                     | 0.59255900  | -4.54856700  | C                         | -4.03030600                                     | 7.84192100  | -8.64785800  |
| N         | -3.66006400                                     | -0.02624900 | -4.94546200  | C                         | -5.95332900                                     | 6.37839900  | -8.92148200  |
| Au        | -4.24542300                                     | 2.69668300  | -6.27517000  | C                         | -4.57501000                                     | 8.72767200  | -9.57607600  |
| H         | -6.75693100                                     | 2.36837800  | -4.81057200  | H                         | -3.06369000                                     | 8.04127800  | -8.19432800  |
| H         | -7.41726500                                     | 1.26125600  | -3.58090100  | C                         | -6.49454100                                     | 7.26940000  | -9.84676800  |
| H         | -7.62290900                                     | 0.89662800  | -5.31708000  | H                         | -6.46365100                                     | 5.45100400  | -8.67964900  |
| H         | -2.09706400                                     | -0.99144600 | -5.95986700  | C                         | -5.80755500                                     | 8.44313000  | -10.17146600 |
| H         | -1.59424800                                     | -0.01861700 | -4.54829500  | H                         | -4.03928900                                     | 9.63500900  | -9.83850700  |
| H         | -2.09086500                                     | 0.78609900  | -6.05924100  | H                         | -7.44589200                                     | 7.04577300  | -10.31985300 |
| H         | -5.39274400                                     | 2.75475600  | -11.23594400 | H                         | -6.22982500                                     | 9.13378900  | -10.89568700 |
| H         | -3.65050200                                     | 2.42121500  | -10.95086100 |                           |                                                 |             |              |
| H         | -4.16360200                                     | 4.04205200  | -11.48427700 | <b>TS<sub>Op-Pp</sub></b> | $E_{M06(\text{dichloroethane})} = -1375.945076$ |             |              |
| C         | -5.39349500                                     | 6.65104700  | -7.88727000  | C                         | -4.31352600                                     | 5.77463300  | -7.40448800  |
| C         | -5.10428000                                     | 8.02341400  | -7.81146400  | C                         | -3.88025500                                     | 4.40074500  | -7.66105700  |
| C         | -6.48747400                                     | 6.18778800  | -8.63599900  | C                         | -4.20518900                                     | 3.84144700  | -9.02836100  |
| C         | -5.91280700                                     | 8.93131100  | -8.48690000  | O                         | -3.39095000                                     | 3.46961000  | -9.84087300  |
| H         | -4.24310000                                     | 8.36165000  | -7.24228700  | O                         | -5.54239900                                     | 3.75733700  | -9.18015000  |
| C         | -7.29319700                                     | 7.10410500  | -9.30642500  | C                         | -5.98265800                                     | 3.21958200  | -10.44398900 |
| H         | -6.67555500                                     | 5.12086700  | -8.69943100  | C                         | -1.88810400                                     | 5.34155800  | -6.57787800  |
| C         | -7.00723900                                     | 8.47125200  | -9.22964500  | C                         | -2.44797900                                     | 5.38700200  | -5.24765200  |
| H         | -5.69293300                                     | 9.99344800  | -8.44249500  | C                         | -1.58724500                                     | 5.34588600  | -4.10353900  |
| H         | -8.13840600                                     | 6.75709500  | -9.89271900  | C                         | -0.22889700                                     | 5.36078300  | -4.28185000  |
| H         | -7.63556000                                     | 9.18310600  | -9.75714200  | C                         | 0.31900300                                      | 5.44135600  | -5.59506100  |
|           |                                                 |             |              | C                         | -0.48405000                                     | 5.46936200  | -6.71570000  |
| <b>Op</b> | $E_{M06(\text{dichloroethane})} = -1375.961167$ |             |              | C                         | -3.78393300                                     | 5.72454900  | -5.10011100  |
| C         | -4.15987700                                     | 5.72567400  | -7.32206400  | H                         | -2.02507800                                     | 5.35153100  | -3.10902500  |
| C         | -3.75448600                                     | 4.31988900  | -7.55171500  | H                         | 0.43660100                                      | 5.34425800  | -3.42491700  |
| C         | -3.84340400                                     | 3.86900400  | -8.98490600  | H                         | 1.39827200                                      | 5.46638700  | -5.71358400  |
| O         | -4.81526300                                     | 3.25252200  | -9.38045800  | H                         | -0.07084700                                     | 5.49610300  | -7.71793700  |
| O         | -2.78722400                                     | 4.19393800  | -9.73346800  | H                         | -4.24686700                                     | 5.88458200  | -4.13162900  |
| C         | -2.86661200                                     | 3.78907900  | -11.11753400 | N                         | -2.62786200                                     | 5.16519800  | -7.70199500  |
| C         | -2.06352100                                     | 5.48772100  | -6.09093700  | O                         | -4.56487700                                     | 6.11617000  | -6.09060200  |
| C         | -2.72492900                                     | 5.87055300  | -4.88605500  | C                         | -4.66233200                                     | 1.22818100  | -5.04762300  |
| C         | -2.01536800                                     | 5.94572100  | -3.65775400  | C                         | -5.66996700                                     | -0.50672500 | -4.01189100  |
| C         | -0.67697000                                     | 5.61462300  | -3.62910800  | C                         | -4.39056700                                     | -0.44870800 | -3.55928400  |
| C         | -0.03549900                                     | 5.21038900  | -4.82267800  | H                         | -6.47814400                                     | -1.17831800 | -3.76665400  |
| C         | -0.70829500                                     | 5.15243800  | -6.04010100  | H                         | -3.86265100                                     | -1.06561300 | -2.84869200  |
| C         | -4.11002900                                     | 6.09639700  | -4.93918400  | C                         | -7.06836100                                     | 0.80955100  | -5.62604300  |
| H         | -2.53557700                                     | 6.25863000  | -2.75606500  | C                         | -2.38360800                                     | 0.98959700  | -4.04083900  |
| H         | -0.11496100                                     | 5.66621900  | -2.70289600  | N                         | -3.79042000                                     | 0.62242400  | -4.19969900  |
| H         | 1.01744700                                      | 4.94481600  | -4.79039100  | N                         | -5.81794800                                     | 0.52679000  | -4.92176400  |
| H         | -0.20646700                                     | 4.85624500  | -6.95483400  | Au                        | -4.27708800                                     | 2.83435400  | -6.28016900  |
| H         | -4.68339000                                     | 6.35250900  | -4.04784700  | H                         | -2.27162400                                     | 2.06438400  | -4.19195200  |
| N         | -2.75034700                                     | 5.45352300  | -7.29556500  | H                         | -1.76708400                                     | 0.45609900  | -4.76950700  |
| O         | -4.82724100                                     | 6.01914700  | -5.99975800  | H                         | -2.06085000                                     | 0.73167600  | -3.02999500  |
| C         | -4.59246600                                     | 1.11511700  | -5.06634600  | H                         | -7.84360800                                     | 1.09061000  | -4.90808500  |
| C         | -4.63462300                                     | -0.43848700 | -3.42561100  | H                         | -7.38594300                                     | -0.07753700 | -6.18002900  |
| C         | -5.53678500                                     | -0.81401200 | -4.36838900  | H                         | -6.90423800                                     | 1.63129600  | -6.32321400  |

|           |                                                 |             |              |                           |                                                 |             |              |
|-----------|-------------------------------------------------|-------------|--------------|---------------------------|-------------------------------------------------|-------------|--------------|
| H         | -7.07090400                                     | 3.20443500  | -10.39080000 | H                         | -7.10828300                                     | 3.80614900  | -14.16252800 |
| H         | -5.58359400                                     | 2.21261700  | -10.59033300 |                           |                                                 |             |              |
| H         | -5.64598900                                     | 3.86164600  | -11.26234000 | <b>TS<sub>Pp-Qp</sub></b> | $E_{M06(\text{dichloroethane})} = -1375.952372$ |             |              |
| C         | -4.77801400                                     | 6.78682800  | -8.36056600  | C                         | -0.22360700                                     | 2.04455700  | -0.64764400  |
| C         | -4.30814200                                     | 6.77657800  | -9.68736500  | C                         | 0.45983500                                      | 0.76510500  | -0.88884000  |
| C         | -5.70733600                                     | 7.76355900  | -7.95943700  | C                         | 0.02284900                                      | -0.00553600 | -2.11950200  |
| C         | -4.77872400                                     | 7.71950400  | -10.59589900 | O                         | 0.75855500                                      | -0.53585900 | -2.91626900  |
| H         | -3.55555500                                     | 6.05909000  | -9.99358100  | O                         | -1.33162400                                     | -0.07408400 | -2.17073900  |
| C         | -6.18073800                                     | 8.69356100  | -8.88145800  | C                         | -1.86421900                                     | -0.77560200 | -3.31112100  |
| H         | -6.07036700                                     | 7.78457400  | -6.93804500  | C                         | 2.52577600                                      | 1.43808900  | 0.13173500   |
| C         | -5.71932500                                     | 8.67490100  | -10.19998300 | C                         | 1.91810400                                      | 1.65552600  | 1.45110000   |
| H         | -4.40324400                                     | 7.71272300  | -11.61459000 | C                         | 2.76306300                                      | 1.60290100  | 2.61185500   |
| H         | -6.90764500                                     | 9.43649100  | -8.56765600  | C                         | 4.11929800                                      | 1.54564200  | 2.46506700   |
| H         | -6.08511200                                     | 9.40670600  | -10.91408000 | C                         | 4.72989600                                      | 1.52227900  | 1.16177300   |
|           |                                                 |             |              | C                         | 3.96884100                                      | 1.49459700  | 0.03342200   |
| <b>Pp</b> | $E_{M06(\text{dichloroethane})} = -1375.952380$ |             |              | C                         | 0.56486900                                      | 1.88560900  | 1.57386700   |
| C         | -4.40566800                                     | 3.11269300  | -9.62647900  | H                         | 2.31069000                                      | 1.69238100  | 3.59602400   |
| C         | -3.71275100                                     | 1.90511200  | -9.15566700  | H                         | 4.75714600                                      | 1.55804900  | 3.34391900   |
| C         | -4.22377100                                     | 0.58685000  | -9.70477800  | H                         | 5.81304600                                      | 1.50948700  | 1.09000000   |
| O         | -3.53869100                                     | -0.31288400 | -10.12727100 | H                         | 4.40134800                                      | 1.42481700  | -0.95876600  |
| O         | -5.57559400                                     | 0.52764600  | -9.59678100  | H                         | 0.07971000                                      | 2.03223200  | 2.53102200   |
| C         | -6.17549000                                     | -0.68081300 | -10.10224900 | N                         | 1.86074400                                      | 1.03689700  | -0.92443600  |
| C         | -1.58668000                                     | 2.98359500  | -8.86239500  | O                         | -0.16196400                                     | 2.53201000  | 0.57045700   |
| C         | -2.09124600                                     | 3.93099100  | -7.85788100  | C                         | -0.65274700                                     | -2.22690500 | 1.94979600   |
| C         | -1.15447600                                     | 4.51919200  | -6.93882900  | C                         | -1.76229900                                     | -3.91643500 | 2.95205200   |
| C         | 0.18559100                                      | 4.34702000  | -7.12968300  | C                         | -0.52852300                                     | -3.84618200 | 3.51630800   |
| C         | 0.69085700                                      | 3.57147600  | -8.23329900  | H                         | -2.59398900                                     | -4.57542200 | 3.14765200   |
| C         | -0.15644200                                     | 2.93391900  | -9.08609800  | H                         | -0.07018000                                     | -4.43983200 | 4.29202600   |
| C         | -3.42851400                                     | 4.24642700  | -7.79265000  | C                         | -3.00319300                                     | -2.63857100 | 1.18116300   |
| H         | -1.52847500                                     | 5.16338900  | -6.14738500  | C                         | 1.52813900                                      | -2.44316600 | 3.16480600   |
| H         | 0.89152600                                      | 4.83430100  | -6.46367400  | N                         | 0.13585400                                      | -2.80277900 | 2.89368700   |
| H         | 1.76494400                                      | 3.48754200  | -8.36676000  | N                         | -1.81923800                                     | -2.91925800 | 1.99270100   |
| H         | 0.19684900                                      | 2.30212900  | -9.89379200  | Au                        | -0.15217000                                     | -0.65992600 | 0.71384000   |
| H         | -3.83638600                                     | 4.92914900  | -7.05757000  | H                         | 1.68714900                                      | -1.39369200 | 2.91308400   |
| N         | -2.32396900                                     | 2.07719300  | -9.45304800  | H                         | 2.20227300                                      | -3.06342300 | 2.56766500   |
| O         | -4.25669600                                     | 4.20711700  | -8.91354700  | H                         | 1.73488700                                      | -2.59495400 | 4.22638200   |
| C         | -4.55006600                                     | 1.08007600  | -5.05267300  | H                         | -3.76047400                                     | -2.12913800 | 1.78370200   |
| C         | -5.56103000                                     | 0.28318900  | -3.19950600  | H                         | -3.40961600                                     | -3.57819500 | 0.79968800   |
| C         | -4.30450800                                     | 0.66160400  | -2.84882600  | H                         | -2.71640500                                     | -2.00237300 | 0.34321500   |
| H         | -6.36286500                                     | -0.13896200 | -2.61369600  | H                         | -2.94689400                                     | -0.75251700 | -3.18836700  |
| H         | -3.79291600                                     | 0.62401800  | -1.89953500  | H                         | -1.49358100                                     | -1.80350100 | -3.33352100  |
| C         | -6.92085600                                     | 0.30141200  | -5.30984800  | H                         | -1.57223700                                     | -0.27192900 | -4.23693300  |
| C         | -2.30927600                                     | 1.59918400  | -4.05406300  | C                         | -0.86298100                                     | 2.90675700  | -1.61459200  |
| N         | -3.70082400                                     | 1.15119300  | -3.99519600  | C                         | -0.55609300                                     | 2.79022900  | -2.98912000  |
| N         | -5.69299500                                     | 0.54433900  | -4.55312000  | C                         | -1.77362400                                     | 3.89899100  | -1.18382800  |
| Au        | -4.16554300                                     | 1.64197300  | -6.99363100  | C                         | -1.15789900                                     | 3.64148900  | -3.90666900  |
| H         | -2.17725700                                     | 2.25823300  | -4.91312300  | H                         | 0.18211400                                      | 2.07060700  | -3.32616100  |
| H         | -1.63986300                                     | 0.74006900  | -4.15243400  | C                         | -2.38508800                                     | 4.72921500  | -2.11322400  |
| H         | -2.07102800                                     | 2.14617000  | -3.13910400  | H                         | -2.00696500                                     | 3.99150000  | -0.12886400  |
| H         | -7.68669600                                     | 1.02856700  | -5.02584000  | C                         | -2.07866000                                     | 4.60250300  | -3.47373100  |
| H         | -7.28007200                                     | -0.70932700 | -5.10173600  | H                         | -0.90583400                                     | 3.56262200  | -4.95935200  |
| H         | -6.70605800                                     | 0.39649300  | -6.37468900  | H                         | -3.09787400                                     | 5.47809900  | -1.78280000  |
| H         | -7.24512200                                     | -0.57271600 | -9.92320200  | H                         | -2.55369900                                     | 5.25903200  | -4.19680300  |
| H         | -5.77600900                                     | -1.55262200 | -9.57804200  |                           |                                                 |             |              |
| H         | -5.97435800                                     | -0.78553700 | -11.17212000 | <b>Qp</b>                 | $E_{M06(\text{dichloroethane})} = -1375.973619$ |             |              |
| C         | -5.14876600                                     | 3.28957900  | -10.85325200 | C                         | -4.30632400                                     | 5.87897100  | -7.14465500  |
| C         | -4.94180700                                     | 2.41624400  | -11.94479300 | C                         | -3.25369700                                     | 4.91994100  | -7.56323700  |
| C         | -6.05849600                                     | 4.36423900  | -10.98083500 | C                         | -3.66194100                                     | 3.91182900  | -8.60170600  |
| C         | -5.63921500                                     | 2.61313000  | -13.12956700 | O                         | -4.81787100                                     | 3.53350400  | -8.68124800  |
| H         | -4.20684900                                     | 1.62135500  | -11.87848900 | O                         | -2.65466400                                     | 3.47968400  | -9.35090600  |
| C         | -6.76678600                                     | 4.53625500  | -12.16227100 | C                         | -2.98356600                                     | 2.43633700  | -10.29645100 |
| H         | -6.21512400                                     | 5.03644200  | -10.14443700 | C                         | -1.53681200                                     | 5.62415200  | -6.06279300  |
| C         | -6.55811600                                     | 3.66319500  | -13.23711100 | C                         | -2.31728600                                     | 5.82886800  | -4.88418500  |
| H         | -5.46351200                                     | 1.95323600  | -13.97312500 | C                         | -1.68732900                                     | 6.36635900  | -3.75707800  |
| H         | -7.47897900                                     | 5.35037100  | -12.25202000 | C                         | -0.33540000                                     | 6.70574800  | -3.78374700  |

|                           |                                                 |             |              |                              |                                                 |             |              |
|---------------------------|-------------------------------------------------|-------------|--------------|------------------------------|-------------------------------------------------|-------------|--------------|
| C                         | 0.42878200                                      | 6.50829300  | -4.94484200  | H                            | -6.79315600                                     | -0.13826300 | -6.79154600  |
| C                         | -0.16090300                                     | 5.94971400  | -6.06639500  | H                            | -9.13712200                                     | 1.23585200  | -6.22336100  |
| C                         | -3.73759400                                     | 5.38711800  | -4.83938400  | C                            | -4.55913400                                     | 1.56825200  | -7.03880700  |
| H                         | -2.26565400                                     | 6.51807100  | -2.84971500  | C                            | -8.75784300                                     | 3.99457900  | -5.99426600  |
| H                         | 0.12946400                                      | 7.12383300  | -2.89574500  | N                            | -7.80219200                                     | 2.93218400  | -6.31045300  |
| H                         | 1.48043800                                      | 6.77606500  | -4.95739600  | N                            | -5.97198300                                     | 1.85748900  | -6.74759200  |
| H                         | 0.40587700                                      | 5.75881800  | -6.97178800  | Au                           | -5.37081300                                     | 4.75435000  | -6.60264400  |
| H                         | -4.22063300                                     | 5.78329500  | -3.94552600  | H                            | -8.32706400                                     | 4.95549000  | -6.27660600  |
| N                         | -2.02006500                                     | 4.98701000  | -7.17990300  | H                            | -8.97889700                                     | 3.99207600  | -4.92358700  |
| O                         | -4.45287100                                     | 6.18756400  | -5.91010800  | H                            | -9.67670400                                     | 3.83105400  | -6.56120400  |
| C                         | -4.52823500                                     | 1.29284400  | -5.07574500  | H                            | -4.45232800                                     | 0.49272000  | -7.18426200  |
| C                         | -4.50396900                                     | -0.94114700 | -4.74688100  | H                            | -3.94125300                                     | 1.88513800  | -6.19548700  |
| C                         | -5.53702000                                     | -0.66111400 | -5.58391300  | H                            | -4.24089600                                     | 2.09465600  | -7.94208100  |
| H                         | -4.14903400                                     | -1.87841100 | -4.34730300  | H                            | -1.87107800                                     | 5.53722500  | -12.36319900 |
| H                         | -6.26031200                                     | -1.30784200 | -6.05569600  | H                            | -3.40306700                                     | 4.63675600  | -12.09566200 |
| C                         | -2.75198300                                     | 0.39750900  | -3.54902100  | H                            | -1.83610400                                     | 3.80482800  | -11.88018000 |
| C                         | -6.50761900                                     | 1.44135500  | -6.59132200  | C                            | -4.51929000                                     | 6.84006200  | -8.85729700  |
| N                         | -5.53397700                                     | 0.70938200  | -5.77652400  | C                            | -4.62604300                                     | 8.23091600  | -8.98651400  |
| N                         | -3.89682400                                     | 0.26748300  | -4.44828200  | C                            | -5.33642100                                     | 6.01060400  | -9.64605800  |
| Au                        | -4.11482900                                     | 3.31476200  | -4.99287900  | C                            | -5.53842700                                     | 8.78426100  | -9.88573200  |
| H                         | -5.98872300                                     | 2.13737400  | -7.25213300  | H                            | -3.98521200                                     | 8.87344500  | -8.39324500  |
| H                         | -7.19539200                                     | 1.99111200  | -5.94374900  | C                            | -6.24199400                                     | 6.56980200  | -10.54595500 |
| H                         | -7.07076000                                     | 0.72371700  | -7.19045000  | H                            | -5.26749200                                     | 4.92967800  | -9.57212600  |
| H                         | -1.96996600                                     | -0.30492000 | -3.84819100  | C                            | -6.34869000                                     | 7.95803600  | -10.66630100 |
| H                         | -3.05796000                                     | 0.18857200  | -2.52007300  | H                            | -5.60869900                                     | 9.86374600  | -9.98012300  |
| H                         | -2.36631800                                     | 1.41502600  | -3.61256900  | H                            | -6.86299800                                     | 5.91861600  | -11.15410600 |
| H                         | -2.05385300                                     | 2.22153800  | -10.82105000 | H                            | -7.05511000                                     | 8.39155900  | -11.36787500 |
| H                         | -3.75397700                                     | 2.78374700  | -10.98936100 |                              |                                                 |             |              |
| H                         | -3.34545000                                     | 1.55150700  | -9.76645700  | <b>PQp</b>                   | $E_{M06}(\text{dichloroethane}) = -935.645623$  |             |              |
| C                         | -5.08874400                                     | 6.62827000  | -8.10424800  | C                            | -3.36817900                                     | 6.29624200  | 7.86482500   |
| C                         | -4.70665200                                     | 6.69456800  | -9.46331100  | C                            | -2.70516300                                     | 4.97476100  | 8.14607900   |
| C                         | -6.23868300                                     | 7.32495100  | -7.66706300  | C                            | -2.63100400                                     | 4.48320900  | 9.57354200   |
| C                         | -5.46372700                                     | 7.43578200  | -10.36070600 | O                            | -2.82263200                                     | 3.34328500  | 9.93005100   |
| H                         | -3.80417500                                     | 6.19908800  | -9.80608600  | O                            | -2.32232500                                     | 5.50336500  | 10.39748900  |
| C                         | -6.99497100                                     | 8.05212300  | -8.57523400  | C                            | -2.31761100                                     | 5.18338000  | 11.79843100  |
| H                         | -6.53110300                                     | 7.26894500  | -6.62450800  | C                            | -2.23412200                                     | 4.55845500  | 5.90121500   |
| C                         | -6.60924500                                     | 8.10888700  | -9.92059200  | C                            | -2.88997200                                     | 5.71662000  | 5.42465800   |
| H                         | -5.16228000                                     | 7.49569400  | -11.40147500 | C                            | -3.02845100                                     | 5.91686800  | 4.05035600   |
| H                         | -7.88559700                                     | 8.57506200  | -8.24172500  | C                            | -2.48264500                                     | 5.00347900  | 3.14666600   |
| H                         | -7.20213000                                     | 8.68185400  | -10.62748100 | C                            | -1.80171900                                     | 3.87452100  | 3.61585700   |
|                           |                                                 |             |              | C                            | -1.68412700                                     | 3.64961300  | 4.98499200   |
|                           |                                                 |             |              | C                            | -3.42052500                                     | 6.67210000  | 6.41446100   |
| <b>TS<sub>Qp-Ap</sub></b> | $E_{M06}(\text{dichloroethane}) = -1375.970052$ |             |              | H                            | -3.54831300                                     | 6.80102400  | 3.68902700   |
| C                         | -3.53066500                                     | 6.27894400  | -7.87263700  | H                            | -2.58067200                                     | 5.17582100  | 2.07856600   |
| C                         | -2.76777900                                     | 5.00512500  | -8.11988900  | H                            | -1.37315900                                     | 3.16696400  | 2.91185100   |
| C                         | -2.80853600                                     | 4.38228400  | -9.49865900  | H                            | -1.18442000                                     | 2.76949700  | 5.37694800   |
| O                         | -3.25598500                                     | 3.27385200  | -9.71646300  | H                            | -4.21419600                                     | 7.34783800  | 6.09567500   |
| O                         | -2.31790000                                     | 5.21545700  | -10.41150900 | H                            | -2.16662100                                     | 4.21923800  | 7.25770800   |
| C                         | -2.36205900                                     | 4.75695200  | -11.78404300 | N                            | -2.47230100                                     | 7.27428300  | 7.31283300   |
| C                         | -2.11306800                                     | 4.67647900  | -5.88000000  | O                            | -2.03735000                                     | 6.10547500  | 12.30773800  |
| C                         | -2.95018200                                     | 5.68425300  | -5.32847100  | H                            | -3.31417700                                     | 4.85784500  | 12.11137100  |
| C                         | -3.08757100                                     | 5.80286600  | -3.93928300  | H                            | -1.59813300                                     | 4.38743200  | 12.00883000  |
| C                         | -2.35676000                                     | 4.96862800  | -3.09734900  | C                            | -4.42716500                                     | 6.79228600  | 8.79744200   |
| C                         | -1.49409300                                     | 4.00150400  | -3.63468200  | C                            | -4.45092000                                     | 8.13148400  | 9.19803100   |
| C                         | -1.38094700                                     | 3.84845100  | -5.01198100  | C                            | -5.41190800                                     | 5.91118600  | 9.26434100   |
| C                         | -3.62827100                                     | 6.59997900  | -6.26011100  | C                            | -5.44981000                                     | 8.58523200  | 10.06024700  |
| H                         | -3.73847100                                     | 6.56913000  | -3.52663000  | H                            | -3.67878500                                     | 8.80187300  | 8.83514900   |
| H                         | -2.44383000                                     | 5.08032000  | -2.02101200  | C                            | -6.40520400                                     | 6.36642700  | 10.13157000  |
| H                         | -0.91914600                                     | 3.36292500  | -2.97120900  | H                            | -5.39809500                                     | 4.86834200  | 8.95567400   |
| H                         | -0.74257400                                     | 3.08773600  | -5.44945400  | C                            | -6.42747300                                     | 7.70528000  | 10.53073200  |
| H                         | -4.41541500                                     | 7.26450500  | -5.89675500  | H                            | -5.46039300                                     | 9.62673300  | 10.37061600  |
| N                         | -2.09155100                                     | 4.35752800  | -7.23591300  | H                            | -7.16355500                                     | 5.67614600  | 10.49088400  |
| O                         | -2.76830400                                     | 7.23983600  | -7.18805300  | H                            | -7.20260900                                     | 8.05998500  | 11.20462200  |
| C                         | -6.47849200                                     | 3.09531600  | -6.53639500  |                              |                                                 |             |              |
| C                         | -6.97894100                                     | 0.91506000  | -6.65083000  | <b>TS<sub>EpIL-FpL</sub></b> | $E_{M06}(\text{dichloroethane}) = -2348.612214$ |             |              |
| C                         | -8.12859400                                     | 1.58787900  | -6.37484800  |                              |                                                 |             |              |



|   |             |             |             |                                                                              |              |             |             |
|---|-------------|-------------|-------------|------------------------------------------------------------------------------|--------------|-------------|-------------|
| C | -3.02798900 | 5.02044400  | 6.56146800  | H                                                                            | -10.22582000 | 2.89070900  | 8.16833300  |
| C | -3.71890900 | 3.89803100  | 6.98356500  | N                                                                            | -6.85759100  | 0.68607600  | 4.74416300  |
| C | -3.90763700 | 3.60158900  | 8.43504300  | N                                                                            | -5.01383400  | 0.31063600  | 3.69914200  |
| O | -5.00588400 | 3.46627500  | 8.94248800  | C                                                                            | -8.35624200  | 3.01534200  | 3.86915800  |
| O | -2.72231400 | 3.44501500  | 9.04099200  | H                                                                            | -7.68546600  | 2.37701400  | 3.28482600  |
| C | -2.54961000 | 5.24191800  | 5.17293100  | C                                                                            | -7.03665700  | -0.46022400 | 7.40560300  |
| C | -2.65541300 | 6.50815900  | 4.57652700  | H                                                                            | -6.47046100  | -0.82529600 | 6.54234100  |
| C | -1.94192900 | 4.19715800  | 4.45922000  | C                                                                            | -4.42570200  | 1.74334800  | 1.26345800  |
| C | -2.18510300 | 6.71965300  | 3.28211500  | H                                                                            | -5.35492200  | 1.18050800  | 1.40740400  |
| H | -3.11152800 | 7.32394300  | 5.13012400  | C                                                                            | -2.99204000  | -0.87010800 | 5.44115800  |
| C | -1.45676000 | 4.41611900  | 3.17043000  | H                                                                            | -4.06439400  | -0.76377100 | 5.62965200  |
| H | -1.83309500 | 3.21873300  | 4.91757200  | C                                                                            | -4.13102400  | 1.74230600  | -0.24499900 |
| C | -1.58190700 | 5.67404900  | 2.57699200  | H                                                                            | -3.29539600  | 2.40470600  | -0.49754300 |
| H | -2.28419500 | 7.69999900  | 2.82510400  | H                                                                            | -3.89162900  | 0.73783500  | -0.61043200 |
| H | -0.98324000 | 3.59990900  | 2.63553600  | H                                                                            | -5.00646000  | 2.10660500  | -0.79294500 |
| H | -1.20454400 | 5.84296800  | 1.57231100  | C                                                                            | -4.67743900  | 3.18066000  | 1.76772800  |
| C | -2.61561700 | 2.88263100  | 10.41380300 | H                                                                            | -5.49955500  | 3.64068200  | 1.20688200  |
| C | -1.10416400 | 2.84952200  | 10.63285700 | H                                                                            | -4.93592300  | 3.19666700  | 2.83068300  |
| H | -0.68366300 | 3.85842500  | 10.56153200 | H                                                                            | -3.78327600  | 3.79932700  | 1.63861200  |
| H | -0.87840800 | 2.44885500  | 11.62605400 | C                                                                            | -2.69461700  | -2.37620200 | 5.30763200  |
| H | -0.61804200 | 2.21925600  | 9.88187400  | H                                                                            | -3.24904500  | -2.81735100 | 4.47194200  |
| C | -3.21210400 | 1.47412100  | 10.42301700 | H                                                                            | -1.62758700  | -2.55501600 | 5.13277900  |
| H | -4.29224100 | 1.50074900  | 10.27115900 | H                                                                            | -2.97929500  | -2.90487400 | 6.22442700  |
| H | -2.75801000 | 0.86365900  | 9.63528700  | C                                                                            | -2.26488400  | -0.26569900 | 6.65705900  |
| H | -3.00657900 | 0.99868000  | 11.38785200 | H                                                                            | -1.17825900  | -0.38472700 | 6.58098100  |
| C | -3.30133700 | 3.81411200  | 11.41566900 | H                                                                            | -2.48387100  | 0.80276200  | 6.75965700  |
| H | -3.11792800 | 3.44644700  | 12.43100600 | H                                                                            | -2.59104300  | -0.76965400 | 7.57429200  |
| H | -2.89228600 | 4.82609500  | 11.34111600 | C                                                                            | -9.68923100  | 3.09689000  | 3.10358400  |
| H | -4.37729100 | 3.85556700  | 11.24349300 | H                                                                            | -10.15566900 | 2.10984500  | 3.01197300  |
| C | -3.33868000 | 6.47858200  | 8.57617300  | H                                                                            | -10.40311900 | 3.75914800  | 3.60584600  |
| C | -2.39947300 | 6.96480500  | 9.53024900  | H                                                                            | -9.52334500  | 3.49282900  | 2.09545100  |
| C | -2.82188000 | 7.57570600  | 10.73174600 | C                                                                            | -7.68667900  | 4.39951700  | 3.97598800  |
| C | -4.17563600 | 7.67426200  | 10.97162100 | H                                                                            | -8.31965600  | 5.10057600  | 4.53232800  |
| C | -5.10764600 | 7.18152400  | 10.02150800 | H                                                                            | -6.72169200  | 4.33234000  | 4.49143800  |
| C | -4.72084200 | 6.59224700  | 8.83087500  | H                                                                            | -7.51333600  | 4.81786100  | 2.97802000  |
| C | -1.11102200 | 6.74353700  | 9.00985900  | C                                                                            | -7.89207500  | -1.63392800 | 7.91559400  |
| H | -2.08974700 | 7.94078900  | 11.44527100 | H                                                                            | -8.46200300  | -1.35822100 | 8.80973600  |
| H | -4.53770200 | 8.12309400  | 11.89022400 | H                                                                            | -8.60550400  | -1.96705200 | 7.15380700  |
| H | -6.16869500 | 7.26285100  | 10.23804000 | H                                                                            | -7.25182500  | -2.48302900 | 8.17989800  |
| H | -5.44058900 | 6.20816300  | 8.11831500  | C                                                                            | -6.01200600  | -0.01101500 | 8.46502600  |
| H | -0.17174800 | 7.08116200  | 9.45420900  | H                                                                            | -5.35670600  | -0.84618300 | 8.74005500  |
| N | -2.76353800 | 6.04810500  | 7.42423900  | H                                                                            | -5.39240500  | 0.81114400  | 8.09428600  |
| O | -1.05757700 | 6.14859600  | 7.88960200  | H                                                                            | -6.51399200  | 0.33977300  | 9.37397000  |
| C | -5.57630400 | 1.11077700  | 4.63807100  | Au                                                                           | -4.65179400  | 2.54852200  | 5.77084200  |
| C | -5.93450800 | -0.61645000 | 3.22643600  |                                                                              |              |             |             |
| C | -7.10136600 | -0.37431900 | 3.88219500  | <b>TS<sub>EpIL-MpL</sub></b> E <sub>M06(dichloroethane)</sub> = -2348.614853 |              |             |             |
| H | -5.67202900 | -1.34524700 | 2.47609900  | C                                                                            | -3.49938500  | 5.21328100  | 6.71182700  |
| H | -8.06899600 | -0.84649800 | 3.82169900  | C                                                                            | -3.88151400  | 3.93797900  | 7.05577700  |
| C | -3.63073800 | 0.40798300  | 3.29868000  | C                                                                            | -3.60954500  | 3.49874500  | 8.45357900  |
| C | -2.65126200 | -0.13803100 | 4.14749200  | O                                                                            | -4.40585100  | 3.72171700  | 9.34664100  |
| C | -3.33364300 | 1.07717500  | 2.09573200  | O                                                                            | -2.46208200  | 2.82500300  | 8.53540800  |
| C | -1.31605000 | -0.01142100 | 3.74177800  | C                                                                            | -3.75508900  | 5.86763500  | 5.39836400  |
| C | -1.98487500 | 1.16075600  | 1.73370300  | C                                                                            | -5.04477700  | 5.86985800  | 4.84682300  |
| C | -0.98703100 | 0.62296800  | 2.54680900  | C                                                                            | -2.71294700  | 6.50041500  | 4.70575500  |
| H | -0.52855100 | -0.42709000 | 4.36293000  | C                                                                            | -5.28243700  | 6.48186500  | 3.61611300  |
| H | -1.70732300 | 1.65674800  | 0.80997300  | H                                                                            | -5.85674600  | 5.38984200  | 5.38478600  |
| H | 0.05388700  | 0.69905100  | 2.24467100  | C                                                                            | -2.95219600  | 7.10762500  | 3.47307800  |
| C | -7.80213800 | 1.26830800  | 5.66698500  | H                                                                            | -1.70919500  | 6.49295300  | 5.12229000  |
| C | -8.53081400 | 2.39532900  | 5.25003400  | C                                                                            | -4.23767500  | 7.09977000  | 2.92545800  |
| C | -7.89473100 | 0.71647800  | 6.95637800  | H                                                                            | -6.28479800  | 6.47498700  | 3.19878300  |
| C | -9.40852000 | 2.96452500  | 6.18009100  | H                                                                            | -2.13467900  | 7.58183800  | 2.93755500  |
| C | -8.78749500 | 1.32470200  | 7.84608900  | H                                                                            | -4.42333200  | 7.57429200  | 1.96628500  |
| C | -9.53861500 | 2.43356700  | 7.46188600  | C                                                                            | -1.97021400  | 2.27585600  | 9.82404000  |
| H | -9.99079700 | 3.83697400  | 5.89907900  | C                                                                            | -0.65962100  | 1.60524300  | 9.41583100  |
| H | -8.88679500 | 0.93226600  | 8.85350700  | H                                                                            | 0.02347100   | 2.33573600  | 8.97069700  |

|   |              |             |             |    |                                             |             |             |
|---|--------------|-------------|-------------|----|---------------------------------------------|-------------|-------------|
| H | -0.17704400  | 1.16290500  | 10.29321500 | C  | -2.91938700                                 | -2.81018600 | 5.48559500  |
| H | -0.84575700  | 0.81441700  | 8.68303800  | H  | -3.25771200                                 | -3.22975200 | 4.53182700  |
| C | -2.97007100  | 1.25486400  | 10.37039200 | H  | -1.83179400                                 | -2.93254000 | 5.53767800  |
| H | -3.90780500  | 1.73188600  | 10.65867000 | H  | -3.35958500                                 | -3.40226900 | 6.29573300  |
| H | -3.17914800  | 0.48985300  | 9.61633800  | C  | -2.88623300                                 | -0.75238800 | 6.97923000  |
| H | -2.53884400  | 0.76239300  | 11.24859000 | H  | -1.79651600                                 | -0.80060300 | 7.08952600  |
| C | -1.72263300  | 3.43469100  | 10.79286400 | H  | -3.18760500                                 | 0.29537800  | 7.08208400  |
| H | -1.23827100  | 3.05729900  | 11.69963100 | H  | -3.33263100                                 | -1.32454900 | 7.80132400  |
| H | -1.05855400  | 4.17352700  | 10.33054200 | C  | -9.97127000                                 | 2.96765500  | 2.67412000  |
| H | -2.65916100  | 3.92143600  | 11.07089400 | H  | -10.70557400                                | 2.16755200  | 2.81578200  |
| C | -2.88112900  | 7.24775300  | 7.97539100  | H  | -10.41781500                                | 3.90382700  | 3.02730800  |
| C | -1.62399700  | 7.81987800  | 8.31378000  | H  | -9.79089900                                 | 3.08110500  | 1.59970700  |
| C | -1.52711900  | 9.15199200  | 8.78075100  | C  | -7.65766700                                 | 3.82784300  | 3.25393900  |
| C | -2.68811600  | 9.88696800  | 8.87117600  | H  | -8.04708100                                 | 4.71834500  | 3.76261600  |
| C | -3.93878600  | 9.31255500  | 8.51173300  | H  | -6.68470600                                 | 3.58813900  | 3.69267800  |
| C | -4.06237900  | 8.00869400  | 8.06610400  | H  | -7.50248700                                 | 4.07758400  | 2.19758900  |
| C | -0.66474200  | 6.82020300  | 8.10030000  | C  | -7.94115100                                 | -1.22785500 | 7.90625600  |
| H | -0.56263600  | 9.57494600  | 9.04278100  | H  | -8.75142900                                 | -1.01561100 | 8.61315900  |
| H | -2.65714000  | 10.91609800 | 9.21246700  | H  | -8.38702800                                 | -1.67715300 | 7.01161300  |
| H | -4.83337900  | 9.92347500  | 8.58952900  | H  | -7.27682300                                 | -1.96819000 | 8.36649100  |
| H | -5.01830100  | 7.57224500  | 7.80268600  | C  | -6.46324300                                 | 0.63816000  | 8.80070700  |
| H | 0.39963400   | 6.85873000  | 8.33285600  | H  | -5.74101100                                 | -0.08474000 | 9.19679000  |
| N | -2.80738400  | 5.92693000  | 7.66914200  | H  | -5.92793800                                 | 1.56382500  | 8.56692800  |
| O | -1.12664600  | 5.72371200  | 7.62432900  | H  | -7.17820300                                 | 0.85989500  | 9.60081200  |
| C | -5.67878800  | 1.09492700  | 4.73271500  | Au | -4.81171200                                 | 2.56202600  | 5.87769800  |
| C | -5.94756900  | -0.68450800 | 3.36605800  |    |                                             |             |             |
| C | -7.16463700  | -0.38695100 | 3.89505500  | Ay | EM06(trifluoromethylbenzene) = -1431.062971 |             |             |
| H | -5.63357100  | -1.45130700 | 2.67590600  | C  | -3.49174800                                 | 4.48103100  | 6.45207800  |
| H | -8.13433800  | -0.83962600 | 3.76153500  | C  | -2.80394900                                 | 4.80614200  | 7.48021000  |
| C | -3.63125100  | 0.27653000  | 3.64428500  | C  | -5.09465400                                 | 0.85861400  | 7.79594700  |
| C | -2.79135300  | -0.48547600 | 4.47516100  | C  | -5.70153900                                 | -1.30663000 | 7.95193000  |
| C | -3.15657600  | 1.12053700  | 2.62587600  | C  | -6.31408800                                 | -0.63464300 | 8.96152500  |
| C | -1.41481400  | -0.40528300 | 4.23547400  | H  | -5.72162100                                 | -2.35083000 | 7.68075400  |
| C | -1.77101200  | 1.16357500  | 2.42960000  | H  | -6.97611400                                 | -0.97838100 | 9.74114900  |
| C | -0.91008100  | 0.40620600  | 3.22115100  | C  | -4.15292500                                 | -0.71092700 | 6.07290100  |
| H | -0.73120900  | -0.97822100 | 4.85481500  | C  | -6.41945700                                 | 1.75225600  | 9.73603400  |
| H | -1.36304800  | 1.80352100  | 1.65303100  | N  | -5.92962800                                 | 0.68990200  | 8.85312700  |
| H | 0.16190700   | 0.45363500  | 3.05103100  | N  | -4.95740900                                 | -0.37613900 | 7.24788600  |
| C | -7.99858700  | 1.36546700  | 5.50998300  | Au | -4.26153300                                 | 2.61420100  | 7.16497500  |
| C | -8.83287800  | 2.30029500  | 4.86781000  | H  | -5.72425400                                 | 2.59100500  | 9.72567300  |
| C | -8.07414900  | 1.07026800  | 6.88247400  | H  | -7.40414600                                 | 2.09000200  | 9.40135100  |
| C | -9.79241800  | 2.94327000  | 5.65695600  | H  | -6.49381300                                 | 1.36000400  | 10.75247900 |
| C | -9.05621500  | 1.74086000  | 7.62293400  | H  | -3.46707900                                 | -1.52517900 | 6.31950800  |
| C | -9.90499600  | 2.66392700  | 7.01882600  | H  | -4.80551000                                 | -1.01670600 | 5.25071200  |
| H | -10.45795600 | 3.67187400  | 5.20665800  | H  | -3.57870900                                 | 0.16570400  | 5.77330200  |
| H | -9.15524900  | 1.53539600  | 8.68418100  | N  | -2.34335000                                 | 5.12755200  | 8.63856000  |
| H | -10.65990500 | 3.17200000  | 7.61231300  | C  | -1.00923600                                 | 4.73032000  | 9.15555400  |
| N | -6.97880100  | 0.71215600  | 4.72442800  | H  | -1.08746200                                 | 3.77682200  | 9.68421100  |
| N | -5.05170100  | 0.23598800  | 3.89397600  | H  | -0.33956200                                 | 4.63441700  | 8.30045800  |
| C | -8.64992300  | 2.65515000  | 3.39484300  | H  | -0.64862600                                 | 5.50005300  | 9.83743400  |
| H | -8.20457600  | 1.79260100  | 2.88677600  | S  | -3.56956900                                 | 5.67217600  | 9.87430200  |
| C | -7.16043200  | 0.05430700  | 7.55869400  | O  | -4.67375800                                 | 4.71909700  | 9.80198900  |
| H | -6.37071500  | -0.22304800 | 6.85407100  | O  | -2.79422500                                 | 5.88317200  | 11.08824900 |
| C | -4.08297100  | 1.99377700  | 1.78936700  | C  | -4.08579900                                 | 7.23396700  | 9.14363200  |
| H | -5.11688900  | 1.76704100  | 2.06956600  | H  | -4.45708000                                 | 7.03929800  | 8.13537600  |
| C | -3.32866300  | -1.33263900 | 5.62217400  | H  | -4.88644300                                 | 7.62224100  | 9.77848900  |
| H | -4.42244300  | -1.29599300 | 5.59760200  | H  | -3.23009300                                 | 7.91106700  | 9.13986200  |
| C | -3.94158200  | 1.69951800  | 0.28501100  | C  | -3.76364800                                 | 5.11508200  | 5.16699600  |
| H | -2.93714100  | 1.94264300  | -0.07924800 | C  | -3.16443800                                 | 6.35103600  | 4.84747400  |
| H | -4.13045700  | 0.64281200  | 0.06591500  | C  | -4.63444700                                 | 4.51832400  | 4.23865600  |
| H | -4.65629900  | 2.30131300  | -0.28757900 | C  | -3.43310000                                 | 6.97013700  | 3.63208400  |
| C | -3.84629600  | 3.48508600  | 2.09423500  | H  | -2.47912500                                 | 6.81266400  | 5.55398500  |
| H | -4.55170100  | 4.10724700  | 1.53252300  | C  | -4.90396400                                 | 5.14412800  | 3.02316000  |
| H | -3.98007500  | 3.70200000  | 3.15881300  | H  | -5.10085900                                 | 3.56748500  | 4.47879500  |
| H | -2.83173700  | 3.79175500  | 1.81499500  | C  | -4.30487200                                 | 6.36818900  | 2.71741800  |

|                                                                                    |             |             |             |                                                                    |             |             |             |
|------------------------------------------------------------------------------------|-------------|-------------|-------------|--------------------------------------------------------------------|-------------|-------------|-------------|
| H                                                                                  | -2.96273000 | 7.91928800  | 3.39339000  | C                                                                  | -2.68784700 | 2.06524000  | 12.13486400 |
| H                                                                                  | -5.57973900 | 4.67586900  | 2.31404500  | C                                                                  | -3.42686100 | 2.55761700  | 13.24973700 |
| H                                                                                  | -4.51293400 | 6.85264600  | 1.76808400  | C                                                                  | -4.62230500 | 3.17815700  | 12.99309500 |
| <b>TS<sub>Ay-Ey1</sub></b> $E_{M06}(\text{trifluoromethylbenzene}) = -1830.555509$ |             |             |             | C                                                                  | -5.11725900 | 3.33690500  | 11.65238600 |
| C                                                                                  | -2.53076500 | 3.17198800  | 8.51294100  | C                                                                  | -4.43826000 | 2.86857000  | 10.55692700 |
| C                                                                                  | -2.16124400 | 4.10884200  | 7.68307600  | C                                                                  | -1.48173400 | 1.42874100  | 11.94474600 |
| C                                                                                  | -1.65200400 | 6.10741200  | 9.83027600  | H                                                                  | -3.05273700 | 2.43930600  | 14.26152300 |
| C                                                                                  | -0.59782200 | 6.40315000  | 10.75939300 | H                                                                  | -5.21725200 | 3.56527200  | 13.81440900 |
| C                                                                                  | -0.88935900 | 7.00519700  | 12.01618100 | H                                                                  | -6.06168900 | 3.85354300  | 11.51017400 |
| C                                                                                  | -2.20259400 | 7.28018700  | 12.29505700 | H                                                                  | -4.80302800 | 3.00560400  | 9.54604600  |
| C                                                                                  | -3.24897300 | 6.97466500  | 11.36147200 | H                                                                  | -0.70487900 | 1.07636100  | 12.60876500 |
| C                                                                                  | -3.00815900 | 6.39464200  | 10.14018200 | N                                                                  | -2.37519200 | 1.65959000  | 9.90434600  |
| C                                                                                  | 0.53621300  | 5.96120900  | 10.11256800 | O                                                                  | -1.28359700 | 1.20411600  | 10.64182300 |
| H                                                                                  | -0.09607100 | 7.23247600  | 12.72036300 | C                                                                  | 0.04383500  | 6.20503000  | 5.31288500  |
| H                                                                                  | -2.46938600 | 7.73774700  | 13.24228300 | C                                                                  | 0.94593900  | 7.15402400  | 3.47837800  |
| H                                                                                  | -4.27187500 | 7.20854100  | 11.64189700 | C                                                                  | 0.41536700  | 8.14840500  | 4.23769500  |
| H                                                                                  | -3.79882500 | 6.14859000  | 9.43972400  | H                                                                  | 1.46836200  | 7.18410600  | 2.53481100  |
| H                                                                                  | 1.58670700  | 5.94771900  | 10.36769900 | H                                                                  | 0.37566300  | 9.21484400  | 4.07922200  |
| N                                                                                  | -1.15472800 | 5.56154100  | 8.71147200  | C                                                                  | 1.16664000  | 4.66100900  | 3.68770800  |
| O                                                                                  | 0.22322600  | 5.45631100  | 8.91703000  | C                                                                  | -0.86136800 | 8.27156900  | 6.40684500  |
| C                                                                                  | -5.58528800 | 1.06901300  | 6.66693000  | N                                                                  | -0.12947200 | 7.54992400  | 5.35988500  |
| C                                                                                  | -7.10192700 | -0.43974800 | 5.95404000  | N                                                                  | 0.70662700  | 5.96839500  | 4.15245100  |
| C                                                                                  | -7.37818600 | 0.74136200  | 5.34054600  | Au                                                                 | -0.56549100 | 4.87918900  | 6.74459200  |
| H                                                                                  | -7.58621700 | -1.40178500 | 5.89111900  | H                                                                  | -0.69967400 | 7.79452500  | 7.37411700  |
| H                                                                                  | -8.14732900 | 1.00710300  | 4.63222300  | H                                                                  | -0.49332000 | 9.29858800  | 6.44383600  |
| C                                                                                  | -5.39868500 | -1.24294100 | 7.61541500  | H                                                                  | -1.93080300 | 8.27324400  | 6.17956500  |
| C                                                                                  | -6.35379400 | 3.05196900  | 5.35461100  | H                                                                  | 0.94225800  | 4.55599300  | 2.62361500  |
| N                                                                                  | -6.44210900 | 1.65464500  | 5.79125700  | H                                                                  | 2.24406000  | 4.56207900  | 3.84728700  |
| N                                                                                  | -5.99904600 | -0.21940400 | 6.76224700  | H                                                                  | 0.64480500  | 3.88279000  | 4.24503400  |
| Au                                                                                 | -4.02816500 | 2.02821800  | 7.58517700  | N                                                                  | -0.99316900 | 4.27963500  | 9.75921800  |
| H                                                                                  | -5.49828900 | 3.19240600  | 4.69069900  | C                                                                  | 0.43159400  | 4.36796900  | 10.14915000 |
| H                                                                                  | -7.27288300 | 3.31174900  | 4.82692100  | H                                                                  | 0.99876200  | 5.04962200  | 9.50561300  |
| H                                                                                  | -6.23461700 | 3.70382300  | 6.22147800  | H                                                                  | 0.49917900  | 4.70340800  | 11.18655900 |
| H                                                                                  | -6.09276600 | -1.51719900 | 8.41469900  | H                                                                  | 0.84536800  | 3.35993300  | 10.08332100 |
| H                                                                                  | -5.16134300 | -2.12613100 | 7.01688500  | S                                                                  | -1.85583800 | 5.78978300  | 9.91233900  |
| H                                                                                  | -4.48265400 | -0.84435700 | 8.05152700  | O                                                                  | -3.12371900 | 5.60404000  | 9.20643300  |
| N                                                                                  | -2.25439600 | 4.58313700  | 6.45290500  | O                                                                  | -0.96723500 | 6.90906200  | 9.56244000  |
| C                                                                                  | -1.18058000 | 4.40718300  | 5.46042600  | C                                                                  | -2.15722100 | 5.83034600  | 11.68440700 |
| H                                                                                  | -0.83140700 | 3.37405300  | 5.51739100  | H                                                                  | -2.77021700 | 4.97112400  | 11.95426800 |
| H                                                                                  | -1.58719600 | 4.59300300  | 4.46500700  | H                                                                  | -1.20727100 | 5.83313000  | 12.22074600 |
| H                                                                                  | -0.35098700 | 5.09119800  | 5.66900100  | H                                                                  | -2.69167700 | 6.76460200  | 11.87315400 |
| S                                                                                  | -3.57769300 | 5.66865900  | 6.08646300  | C                                                                  | -2.37092500 | 1.89024200  | 7.02134200  |
| O                                                                                  | -4.52547900 | 5.52526700  | 7.19071600  | C                                                                  | -1.97934500 | 0.54408600  | 6.88242300  |
| O                                                                                  | -3.95834500 | 5.38262300  | 4.70462000  | C                                                                  | -3.37675400 | 2.42574000  | 6.18760500  |
| C                                                                                  | -2.80837100 | 7.29404600  | 6.17534200  | C                                                                  | -2.57732700 | -0.24840000 | 5.90967100  |
| H                                                                                  | -2.38291200 | 7.41273200  | 7.17309800  | H                                                                  | -1.22730500 | 0.13772400  | 7.55034400  |
| H                                                                                  | -2.03762900 | 7.35821800  | 5.40471500  | C                                                                  | -3.95950600 | 1.62487300  | 5.21070200  |
| H                                                                                  | -3.59476000 | 8.02976700  | 5.98948600  | H                                                                  | -3.67025000 | 3.46341600  | 6.31384200  |
| C                                                                                  | -2.11472800 | 2.98591800  | 9.90975000  | C                                                                  | -3.56202900 | 0.29061300  | 5.07239200  |
| C                                                                                  | -0.75818100 | 2.82645300  | 10.23502100 | H                                                                  | -2.28085400 | -1.28709300 | 5.80125200  |
| C                                                                                  | -3.07388100 | 2.96473900  | 10.93435000 | H                                                                  | -4.72706800 | 2.03577500  | 4.56204200  |
| C                                                                                  | -0.36850400 | 2.67503700  | 11.56549800 | H                                                                  | -4.02445900 | -0.33388500 | 4.31354400  |
| H                                                                                  | -0.01844100 | 2.81941400  | 9.44100900  | <b>Ey1</b> $E_{M06}(\text{trifluoromethylbenzene}) = -1830.582200$ |             |             |             |
| C                                                                                  | -2.67636200 | 2.83717400  | 12.26471100 | C                                                                  | -2.51029900 | 3.47696600  | 8.68598700  |
| H                                                                                  | -4.12499900 | 3.06814400  | 10.68052000 | C                                                                  | -1.90899500 | 4.56340900  | 8.14185300  |
| C                                                                                  | -1.32408000 | 2.69156700  | 12.58476000 | C                                                                  | -1.55581300 | 6.17311500  | 10.07064800 |
| H                                                                                  | 0.68251400  | 2.54059400  | 11.80602200 | C                                                                  | -0.37952700 | 6.74257200  | 10.65690100 |
| H                                                                                  | -3.42499200 | 2.84156300  | 13.05172300 | C                                                                  | -0.47650700 | 7.53712800  | 11.83498300 |
| H                                                                                  | -1.01845700 | 2.57779400  | 13.62071000 | C                                                                  | -1.72579600 | 7.71789600  | 12.36773400 |
| <b>TS<sub>Ay-Ey2</sub></b> $E_{M06}(\text{trifluoromethylbenzene}) = -1830.538697$ |             |             |             | C                                                                  | -2.89154700 | 7.14371500  | 11.75956100 |
| C                                                                                  | -1.77919400 | 2.72765800  | 8.00672400  | C                                                                  | -2.84008900 | 6.37449000  | 10.62060300 |
| C                                                                                  | -1.18174800 | 3.76219700  | 8.45142800  | C                                                                  | 0.65100200  | 6.33130000  | 9.83693500  |
| C                                                                                  | -3.20116000 | 2.20694700  | 10.79717400 | H                                                                  | 0.40917300  | 7.97352800  | 12.28359500 |
|                                                                                    |             |             |             | H                                                                  | -1.84904000 | 8.31233600  | 13.26698700 |

|                                                                    |             |             |             |                                                                                     |             |             |             |
|--------------------------------------------------------------------|-------------|-------------|-------------|-------------------------------------------------------------------------------------|-------------|-------------|-------------|
| H                                                                  | -3.85640800 | 7.33101300  | 12.22091900 | H                                                                                   | 0.05110400  | 6.73858600  | 2.23872600  |
| H                                                                  | -3.71343400 | 5.95602800  | 10.13907500 | H                                                                                   | 0.38570700  | 8.94615200  | 3.88665800  |
| H                                                                  | 1.71745200  | 6.51365700  | 9.83708200  | C                                                                                   | -0.62092600 | 4.42669800  | 3.64390400  |
| N                                                                  | -1.19724800 | 5.47760700  | 8.97959900  | C                                                                                   | -0.04570300 | 8.37863600  | 6.57790600  |
| O                                                                  | 0.20291100  | 5.57141200  | 8.84065200  | N                                                                                   | -0.10255500 | 7.49435400  | 5.41178900  |
| C                                                                  | -5.38830900 | 1.26436100  | 6.71838400  | N                                                                                   | -0.36656800 | 5.78003400  | 4.13235100  |
| C                                                                  | -6.61917200 | -0.48362600 | 5.98376700  | Au                                                                                  | -0.85901100 | 5.02802500  | 7.08825500  |
| C                                                                  | -7.22294200 | 0.65402400  | 5.55217600  | H                                                                                   | -0.20238700 | 7.79931500  | 7.48771300  |
| H                                                                  | -6.87836300 | -1.52157600 | 5.84330900  | H                                                                                   | 0.93418700  | 8.86170200  | 6.61955200  |
| H                                                                  | -8.11893000 | 0.80288300  | 4.96980500  | H                                                                                   | -0.82593600 | 9.14062400  | 6.49805400  |
| C                                                                  | -4.56112400 | -1.03200200 | 7.30500300  | H                                                                                   | -1.42641000 | 4.44692800  | 2.90475600  |
| C                                                                  | -6.80446300 | 3.11970900  | 5.80735300  | H                                                                                   | 0.28507200  | 4.02042800  | 3.18482100  |
| N                                                                  | -6.45505200 | 1.71161000  | 6.00678300  | H                                                                                   | -0.91727800 | 3.79420200  | 4.48106800  |
| N                                                                  | -5.49996400 | -0.09116200 | 6.69801100  | N                                                                                   | -1.14928600 | 4.51445500  | 10.10983000 |
| Au                                                                 | -3.93213100 | 2.39060300  | 7.66178400  | C                                                                                   | 0.24672800  | 4.29379600  | 10.58566600 |
| H                                                                  | -5.89930900 | 3.72602600  | 5.80131800  | H                                                                                   | 0.97108600  | 4.75323200  | 9.87571400  |
| H                                                                  | -7.31198000 | 3.22242700  | 4.84565200  | H                                                                                   | 0.38731500  | 4.69935000  | 11.56335900 |
| H                                                                  | -7.46997000 | 3.45659300  | 6.60747900  | H                                                                                   | 0.41433800  | 3.21536900  | 10.59748400 |
| H                                                                  | -5.11089000 | -1.75465200 | 7.91352000  | S                                                                                   | -1.62408900 | 6.17300900  | 10.18720300 |
| H                                                                  | -4.00130900 | -1.55964600 | 6.52742000  | O                                                                                   | -2.93130900 | 6.24857900  | 9.52331000  |
| H                                                                  | -3.86740300 | -0.48028400 | 7.93942600  | O                                                                                   | -0.53494600 | 7.07212800  | 9.77860300  |
| N                                                                  | -1.97944300 | 5.01714100  | 6.79671600  | C                                                                                   | -1.88206600 | 6.37054700  | 11.96025000 |
| C                                                                  | -1.49991200 | 4.11734200  | 5.73087500  | H                                                                                   | -2.62066800 | 5.63668600  | 12.28499800 |
| H                                                                  | -2.18003300 | 3.27852800  | 5.55340700  | H                                                                                   | -0.93904400 | 6.25601800  | 12.49621700 |
| H                                                                  | -1.37865700 | 4.68276400  | 4.80296700  | H                                                                                   | -2.26090400 | 7.38695400  | 12.09214300 |
| H                                                                  | -0.52212700 | 3.74022900  | 6.03661000  | C                                                                                   | -1.95128000 | 1.79575000  | 7.57419600  |
| S                                                                  | -3.40088400 | 5.90629800  | 6.42351200  | C                                                                                   | -0.88040200 | 1.65505100  | 6.67689500  |
| O                                                                  | -3.93632700 | 6.38198000  | 7.70389000  | C                                                                                   | -3.13684800 | 1.08118300  | 7.33646400  |
| O                                                                  | -4.24246100 | 5.14466600  | 5.49027200  | C                                                                                   | -1.00843100 | 0.84748000  | 5.54623200  |
| C                                                                  | -2.73267500 | 7.31501200  | 5.52294600  | H                                                                                   | 0.05241100  | 2.17166400  | 6.87891400  |
| H                                                                  | -2.07487600 | 7.87015100  | 6.19291200  | C                                                                                   | -3.26111700 | 0.27228900  | 6.20858300  |
| H                                                                  | -2.19168700 | 6.95797500  | 4.64471200  | H                                                                                   | -3.97311200 | 1.17710500  | 8.02489700  |
| H                                                                  | -3.58369000 | 7.92726800  | 5.21555100  | C                                                                                   | -2.19898700 | 0.15737200  | 5.30695100  |
| C                                                                  | -2.18859900 | 3.08828200  | 10.07790300 | H                                                                                   | -0.16985000 | 0.74199000  | 4.86355400  |
| C                                                                  | -0.85591800 | 2.91717300  | 10.49826300 | H                                                                                   | -4.18833200 | -0.26417600 | 6.02929300  |
| C                                                                  | -3.21867000 | 2.88307400  | 11.01355200 | H                                                                                   | -2.29589200 | -0.47662300 | 4.43046900  |
| C                                                                  | -0.56442600 | 2.56669500  | 11.81629800 |                                                                                     |             |             |             |
| H                                                                  | -0.05167100 | 3.03527500  | 9.77708100  | <b>TS<sub>Ey1-Fy1</sub></b> $E_{M06(\text{trifluoromethylbenzene})} = -1830.571279$ |             |             |             |
| C                                                                  | -2.92323900 | 2.55929000  | 12.33677400 | C                                                                                   | -2.30210900 | 2.78713700  | 8.91585200  |
| H                                                                  | -4.25176000 | 2.99044600  | 10.69396700 | C                                                                                   | -1.73539400 | 3.98392200  | 8.50802700  |
| C                                                                  | -1.59578600 | 2.39818900  | 12.74329800 | C                                                                                   | -1.57665800 | 5.22234000  | 10.65766100 |
| H                                                                  | 0.46888100  | 2.41972100  | 12.11876300 | C                                                                                   | -0.47566600 | 5.62173300  | 11.46734300 |
| H                                                                  | -3.73136300 | 2.41924600  | 13.04922500 | C                                                                                   | -0.67388300 | 6.09644900  | 12.78848400 |
| H                                                                  | -1.36810300 | 2.12780100  | 13.77025300 | C                                                                                   | -1.96211900 | 6.14872200  | 13.26474300 |
|                                                                    |             |             |             | C                                                                                   | -3.05730600 | 5.75602400  | 12.44087800 |
| <b>Ey2</b> $E_{M06(\text{trifluoromethylbenzene})} = -1830.577895$ |             |             |             | C                                                                                   | -2.89711900 | 5.29748200  | 11.14861000 |
| C                                                                  | -1.83537300 | 2.68403200  | 8.75372600  | C                                                                                   | 0.67001900  | 5.46273600  | 10.68470000 |
| C                                                                  | -1.34791100 | 3.95283700  | 8.77394100  | H                                                                                   | 0.17281600  | 6.40003200  | 13.39564100 |
| C                                                                  | -3.32676300 | 2.47667800  | 10.80859800 | H                                                                                   | -2.15780900 | 6.49724500  | 14.27314900 |
| C                                                                  | -3.40251600 | 1.49658700  | 11.85174500 | H                                                                                   | -4.06237700 | 5.82496000  | 12.84689100 |
| C                                                                  | -4.37361200 | 1.62488300  | 12.88647700 | H                                                                                   | -3.72638200 | 5.02669400  | 10.50736500 |
| C                                                                  | -5.21372600 | 2.70615500  | 12.82970900 | H                                                                                   | 1.69643800  | 5.72366000  | 10.94071300 |
| C                                                                  | -5.12317700 | 3.67196100  | 11.77207700 | N                                                                                   | -1.20267100 | 4.86988700  | 9.40832900  |
| C                                                                  | -4.19873300 | 3.58674100  | 10.75563800 | O                                                                                   | 0.46081200  | 4.98592800  | 9.50737300  |
| C                                                                  | -2.42467100 | 0.57581700  | 11.53509800 | C                                                                                   | -5.32940300 | 1.04714000  | 6.71815000  |
| H                                                                  | -4.43662600 | 0.88891800  | 13.68059900 | C                                                                                   | -6.65740500 | -0.44321500 | 5.66152900  |
| H                                                                  | -5.96968500 | 2.84383800  | 13.59579800 | C                                                                                   | -7.24907600 | 0.77649500  | 5.56449500  |
| H                                                                  | -5.81633800 | 4.50797400  | 11.77665800 | H                                                                                   | -6.95923800 | -1.40971900 | 5.28894400  |
| H                                                                  | -4.11069100 | 4.33197500  | 9.97383200  | H                                                                                   | -8.17405400 | 1.07868500  | 5.09865500  |
| H                                                                  | -2.09740400 | -0.35126700 | 11.98604500 | C                                                                                   | -4.53490800 | -1.33073900 | 6.66136100  |
| N                                                                  | -2.34977400 | 2.12038500  | 9.96058500  | C                                                                                   | -6.71021700 | 3.10227500  | 6.38068500  |
| O                                                                  | -1.77915300 | 0.92613400  | 10.42394800 | N                                                                                   | -6.42158100 | 1.67487400  | 6.21306300  |
| C                                                                  | -0.40953400 | 6.17126500  | 5.43387300  | N                                                                                   | -5.48550200 | -0.25860900 | 6.37493000  |
| C                                                                  | -0.03606400 | 6.84354600  | 3.30911800  | Au                                                                                  | -3.79157200 | 1.91614300  | 7.79194000  |
| C                                                                  | 0.12900000  | 7.92351600  | 4.11611900  | H                                                                                   | -5.81341400 | 3.68431700  | 6.16703800  |

|                                                                                      |             |             |             |                                                                    |             |             |             |
|--------------------------------------------------------------------------------------|-------------|-------------|-------------|--------------------------------------------------------------------|-------------|-------------|-------------|
| H                                                                                    | -7.50094500 | 3.38118900  | 5.68197900  | H                                                                  | -1.30262100 | 1.72750300  | 7.34553200  |
| H                                                                                    | -7.04279600 | 3.29768900  | 7.40356600  | H                                                                  | -2.82020100 | 2.08309300  | 8.19235000  |
| H                                                                                    | -3.82616600 | -0.98402900 | 7.41363200  | S                                                                  | -0.54162300 | 4.31235600  | 6.49346300  |
| H                                                                                    | -5.07326600 | -2.20083900 | 7.04519300  | O                                                                  | -0.63564000 | 5.77461800  | 6.43645400  |
| H                                                                                    | -3.99329800 | -1.60761800 | 5.75229400  | O                                                                  | -0.48013300 | 3.50605700  | 5.26802000  |
| N                                                                                    | -1.79407500 | 4.49459300  | 7.18096800  | C                                                                  | 0.89234400  | 3.87402400  | 7.49373600  |
| C                                                                                    | -1.24573100 | 3.68490200  | 6.07919300  | H                                                                  | 0.83786900  | 4.42601300  | 8.43316400  |
| H                                                                                    | -1.90023500 | 2.85473300  | 5.79611000  | H                                                                  | 0.89186200  | 2.79676100  | 7.66996900  |
| H                                                                                    | -1.08492800 | 4.32235200  | 5.20584300  | H                                                                  | 1.77842700  | 4.16028100  | 6.92219700  |
| H                                                                                    | -0.27834500 | 3.29899100  | 6.40688800  | C                                                                  | -4.83830300 | 6.08764500  | 7.08964400  |
| S                                                                                    | -3.19734300 | 5.40320500  | 6.81344900  | C                                                                  | -6.17883400 | 5.86282700  | 6.71670600  |
| O                                                                                    | -3.88233300 | 5.66334200  | 8.08493300  | C                                                                  | -4.51529700 | 7.29392300  | 7.74436800  |
| O                                                                                    | -3.90837400 | 4.76182700  | 5.69799000  | C                                                                  | -7.17085500 | 6.78405000  | 7.04326600  |
| C                                                                                    | -2.50092300 | 6.94774900  | 6.20784400  | H                                                                  | -6.43411800 | 4.94665300  | 6.19158500  |
| H                                                                                    | -1.92732600 | 7.40072000  | 7.01773800  | C                                                                  | -5.50377900 | 8.23292200  | 8.02846100  |
| H                                                                                    | -1.86506200 | 6.73556800  | 5.34608400  | H                                                                  | -3.47923000 | 7.50966700  | 7.98524300  |
| H                                                                                    | -3.33688000 | 7.58640500  | 5.91310800  | C                                                                  | -6.83617800 | 7.97510100  | 7.69450300  |
| C                                                                                    | -1.90865000 | 2.20110600  | 10.20030600 | H                                                                  | -8.20362300 | 6.58149000  | 6.77450700  |
| C                                                                                    | -2.88251300 | 1.68159100  | 11.07890000 | H                                                                  | -5.23445000 | 9.16904500  | 8.50940900  |
| C                                                                                    | -0.55164300 | 2.12886800  | 10.58357700 | H                                                                  | -7.60667900 | 8.70488900  | 7.92561000  |
| C                                                                                    | -2.51682000 | 1.16070600  | 12.31649900 |                                                                    |             |             |             |
| H                                                                                    | -3.92844400 | 1.71481500  | 10.78766600 | <b>Fy1</b> E <sub>M06(trifluoromethylbenzene)</sub> = -1830.619450 |             |             |             |
| C                                                                                    | -0.18702400 | 1.56950100  | 11.80548700 | C                                                                  | -2.37928100 | 2.71355200  | 8.98009000  |
| H                                                                                    | 0.21195200  | 2.48587400  | 9.90010700  | C                                                                  | -2.23816700 | 4.18497200  | 8.83961700  |
| C                                                                                    | -1.16830900 | 1.09828600  | 12.68238000 | C                                                                  | -2.49941900 | 4.67241700  | 11.13859500 |
| H                                                                                    | -3.28137100 | 0.78724600  | 12.99149500 | C                                                                  | -1.56663800 | 5.01482200  | 12.14844400 |
| H                                                                                    | 0.86305300  | 1.49724600  | 12.07444900 | C                                                                  | -1.89208900 | 4.77366800  | 13.49346300 |
| H                                                                                    | -0.88328700 | 0.66965800  | 13.63876800 | C                                                                  | -3.10653100 | 4.19764700  | 13.85149800 |
|                                                                                      |             |             |             | C                                                                  | -4.02765200 | 3.87515700  | 12.84939700 |
| <b>TS</b> <sub>Ey1-My1</sub> E <sub>M06(trifluoromethylbenzene)</sub> = -1830.568904 |             |             |             | C                                                                  | -3.73438000 | 4.11574100  | 11.50774900 |
| C                                                                                    | -3.81137500 | 5.09126300  | 6.74654800  | C                                                                  | -0.25248000 | 5.60323700  | 11.83646700 |
| C                                                                                    | -2.89615000 | 4.70156100  | 7.70331800  | H                                                                  | -1.16869300 | 5.03950500  | 14.26098100 |
| C                                                                                    | -2.08617000 | 5.57783300  | 9.87873200  | H                                                                  | -3.34092400 | 4.01309400  | 14.89484500 |
| C                                                                                    | -2.35208100 | 5.17344600  | 11.21727300 | H                                                                  | -4.98914700 | 3.44384300  | 13.11383700 |
| C                                                                                    | -1.55806400 | 5.63812500  | 12.29392200 | H                                                                  | -4.46905200 | 3.92028800  | 10.73270300 |
| C                                                                                    | -0.50594100 | 6.47531300  | 11.99930700 | H                                                                  | 0.29382900  | 5.99625200  | 12.72012100 |
| C                                                                                    | -0.23908600 | 6.86112800  | 10.65494500 | N                                                                  | -2.26172400 | 5.02307900  | 9.80589100  |
| C                                                                                    | -1.00429700 | 6.43339400  | 9.58400100  | O                                                                  | 0.25170800  | 5.67039300  | 10.72596300 |
| C                                                                                    | -3.47158300 | 4.33736900  | 11.15153200 | C                                                                  | -5.96474900 | 1.46548600  | 7.41471500  |
| H                                                                                    | -1.77374900 | 5.32893400  | 13.31156100 | C                                                                  | -7.81709200 | 0.30567700  | 6.85561300  |
| H                                                                                    | 0.13388700  | 6.84656400  | 12.79270500 | C                                                                  | -7.81652300 | 1.45807400  | 6.13203600  |
| H                                                                                    | 0.60212700  | 7.52066000  | 10.46146800 | H                                                                  | -8.51935700 | -0.51299200 | 6.88368800  |
| H                                                                                    | -0.79771100 | 6.72408000  | 8.56007400  | H                                                                  | -8.52232700 | 1.83847100  | 5.41013100  |
| H                                                                                    | -4.03539400 | 3.89333800  | 11.97040000 | C                                                                  | -6.28970900 | -0.75622700 | 8.53501900  |
| N                                                                                    | -3.01717600 | 5.13030400  | 9.00274700  | C                                                                  | -6.30216600 | 3.46846300  | 5.95266100  |
| O                                                                                    | -3.90183100 | 4.12633000  | 9.95704100  | N                                                                  | -6.67781000 | 2.15338200  | 6.48650700  |
| C                                                                                    | -3.69810200 | 3.93859100  | 2.79729500  | N                                                                  | -6.67581700 | 0.32850500  | 7.63543200  |
| C                                                                                    | -3.25873900 | 2.89716400  | 0.84305500  | Au                                                                 | -4.16747400 | 2.05644700  | 8.24270800  |
| C                                                                                    | -4.11179300 | 3.92071400  | 0.57593000  | H                                                                  | -5.31206600 | 3.42175400  | 5.49662200  |
| H                                                                                    | -2.81093400 | 2.16127100  | 0.19349900  | H                                                                  | -7.03267600 | 3.75800200  | 5.19632100  |
| H                                                                                    | -4.54451300 | 4.25889500  | -0.35278200 | H                                                                  | -6.28246200 | 4.20454700  | 6.75607400  |
| C                                                                                    | -2.17928500 | 1.95621600  | 2.91340900  | H                                                                  | -5.48997700 | -0.40676600 | 9.18816800  |
| C                                                                                    | -5.21392000 | 5.73246000  | 1.91393700  | H                                                                  | -7.14907700 | -1.04777500 | 9.14356000  |
| N                                                                                    | -4.37277700 | 4.54402100  | 1.78360700  | H                                                                  | -5.94055100 | -1.61732100 | 7.95809600  |
| N                                                                                    | -3.01482400 | 2.92635400  | 2.20422500  | N                                                                  | -2.26055100 | 4.67852500  | 7.52439500  |
| Au                                                                                   | -3.72462500 | 4.46238600  | 4.79761100  | C                                                                  | -1.68436700 | 3.89808800  | 6.41528400  |
| H                                                                                    | -5.44992200 | 5.88793300  | 2.96685800  | H                                                                  | -2.35728000 | 3.11683300  | 6.04718500  |
| H                                                                                    | -4.68780700 | 6.61018100  | 1.52794200  | H                                                                  | -1.44521000 | 4.57344600  | 5.59394100  |
| H                                                                                    | -6.14002800 | 5.58432800  | 1.35303200  | H                                                                  | -0.75850100 | 3.44336700  | 6.77540000  |
| H                                                                                    | -1.44844300 | 1.54595700  | 2.21355800  | S                                                                  | -3.58052100 | 5.73360500  | 7.14961000  |
| H                                                                                    | -1.65550600 | 2.45688300  | 3.72721600  | O                                                                  | -4.69877400 | 5.40108800  | 8.04193600  |
| H                                                                                    | -2.79919100 | 1.14503100  | 3.30660500  | O                                                                  | -3.74564500 | 5.64126800  | 5.69669700  |
| N                                                                                    | -1.82633700 | 3.77135300  | 7.48139400  | C                                                                  | -2.93650400 | 7.34766500  | 7.60083400  |
| C                                                                                    | -2.19883600 | 2.35272600  | 7.33487700  | H                                                                  | -2.64670900 | 7.29707900  | 8.65131300  |
| H                                                                                    | -2.75424400 | 2.16951700  | 6.40849800  | H                                                                  | -2.07839800 | 7.56041200  | 6.96096200  |

|            |                                                         |             |             |                            |                                                         |             |             |
|------------|---------------------------------------------------------|-------------|-------------|----------------------------|---------------------------------------------------------|-------------|-------------|
| H          | -3.73842300                                             | 8.07143400  | 7.43541600  | C                          | -4.89166400                                             | 10.02019700 | 6.90464000  |
| C          | -1.32801500                                             | 1.97072800  | 9.56557500  | H                          | -6.43873900                                             | 9.42650000  | 5.51995400  |
| C          | -1.47655000                                             | 0.56734500  | 9.78637500  | H                          | -3.23559900                                             | 10.34954900 | 8.25244400  |
| C          | -0.09498500                                             | 2.59365900  | 9.93561300  | H                          | -5.28057900                                             | 11.02781200 | 7.02192800  |
| C          | -0.45440800                                             | -0.16908700 | 10.35605800 |                            |                                                         |             |             |
| H          | -2.40919100                                             | 0.09183300  | 9.49971500  | <b>TS<sub>Fy1-Gy</sub></b> | $E_{M06}(\text{trifluoromethylbenzene}) = -1830.601665$ |             |             |
| C          | 0.92336300                                              | 1.84577900  | 10.50124800 | C                          | -2.79281600                                             | 2.65088300  | 9.46287800  |
| H          | 0.03626300                                              | 3.66132700  | 9.79043400  | C                          | -2.57223200                                             | 4.07335000  | 9.00478900  |
| C          | 0.74516300                                              | 0.47025900  | 10.71220600 | C                          | -2.58978800                                             | 4.55151200  | 11.13237400 |
| H          | -0.57212600                                             | -1.23447300 | 10.52564800 | C                          | -1.83176000                                             | 4.98966300  | 12.25247300 |
| H          | 1.85615300                                              | 2.32443100  | 10.78166000 | C                          | -1.79948700                                             | 4.15472100  | 13.36287500 |
| H          | 1.54820200                                              | -0.11164600 | 11.15632900 | C                          | -2.52925300                                             | 2.93716100  | 13.44163500 |
|            |                                                         |             |             | C                          | -3.37364200                                             | 2.58059200  | 12.41955800 |
| <b>My1</b> | $E_{M06}(\text{trifluoromethylbenzene}) = -1830.617012$ |             |             | C                          | -3.44397900                                             | 3.38896700  | 11.23863700 |
| C          | -3.37612200                                             | 6.10137200  | 6.40776500  | C                          | -0.99825700                                             | 6.22393700  | 12.23889300 |
| C          | -2.36017400                                             | 5.56801300  | 7.36203300  | H                          | -1.16919700                                             | 4.43828200  | 14.20380100 |
| C          | -2.48133800                                             | 4.69756700  | 9.65213400  | H                          | -2.45444500                                             | 2.33197500  | 14.33913500 |
| C          | -2.79537900                                             | 3.32391900  | 9.84312600  | H                          | -4.01194400                                             | 1.70562900  | 12.50059700 |
| C          | -2.54651500                                             | 2.72940100  | 11.09401000 | H                          | -4.42980700                                             | 3.48843500  | 10.79058800 |
| C          | -1.96714100                                             | 3.44312000  | 12.13475400 | H                          | -0.46785100                                             | 6.41103500  | 13.19789200 |
| C          | -1.65042500                                             | 4.79203600  | 11.93577500 | N                          | -2.41331000                                             | 5.04205500  | 9.88604500  |
| C          | -1.91975700                                             | 5.41685600  | 10.72033300 | O                          | -0.88475600                                             | 6.98487600  | 11.30197300 |
| C          | -3.33519400                                             | 2.46877000  | 8.78062700  | C                          | -6.17144500                                             | 1.34375000  | 7.44181100  |
| H          | -2.80458200                                             | 1.68165200  | 11.23158400 | C                          | -7.88680800                                             | 0.26904000  | 6.44539200  |
| H          | -1.77156000                                             | 2.96597200  | 13.08930800 | C                          | -7.91941000                                             | 1.56421100  | 6.03408500  |
| H          | -1.20344500                                             | 5.36875900  | 12.74061600 | H                          | -8.52880600                                             | -0.56579500 | 6.21074100  |
| H          | -1.71231700                                             | 6.47375300  | 10.58447500 | H                          | -8.59088600                                             | 2.07571400  | 5.36207200  |
| H          | -3.70951600                                             | 1.48465300  | 9.13105800  | C                          | -6.44346200                                             | -1.08459900 | 7.99038600  |
| N          | -2.86569100                                             | 5.39960500  | 8.51663500  | C                          | -6.51115400                                             | 3.61610900  | 6.43764300  |
| O          | -3.36290000                                             | 2.73925800  | 7.58511100  | N                          | -6.86550300                                             | 2.20891500  | 6.65610000  |
| C          | -4.44909300                                             | 3.15641400  | 3.77632900  | N                          | -6.80752000                                             | 0.15321200  | 7.30505500  |
| C          | -4.26017600                                             | 1.19623800  | 2.68086200  | Au                         | -4.48721400                                             | 1.85766900  | 8.51344600  |
| C          | -5.33891600                                             | 1.84824400  | 2.16900300  | H                          | -5.70432200                                             | 3.70076100  | 5.70468700  |
| H          | -3.83102200                                             | 0.23813000  | 2.43242400  | H                          | -7.39038200                                             | 4.14590300  | 6.06750800  |
| H          | -6.03258900                                             | 1.56920800  | 1.39121400  | H                          | -6.18866700                                             | 4.07334000  | 7.37331800  |
| C          | -2.55079600                                             | 1.69968500  | 4.47810500  | H                          | -5.47212700                                             | -0.94976900 | 8.46653000  |
| C          | -6.47849600                                             | 4.04081600  | 2.60396400  | H                          | -7.19169800                                             | -1.32827300 | 8.74990300  |
| N          | -5.43711600                                             | 3.04747600  | 2.85215900  | H                          | -6.37986000                                             | -1.89942800 | 7.26493700  |
| N          | -3.72979000                                             | 2.01131100  | 3.66179400  | N                          | -2.58175700                                             | 4.38518900  | 7.67950600  |
| Au         | -3.99956100                                             | 4.66856100  | 5.09687000  | C                          | -2.23391400                                             | 3.43027200  | 6.61415500  |
| H          | -6.28405700                                             | 4.91357600  | 3.22720400  | H                          | -3.12149100                                             | 3.00205300  | 6.14300400  |
| H          | -6.46396700                                             | 4.33640800  | 1.55163400  | H                          | -1.64498300                                             | 3.94949900  | 5.85612000  |
| H          | -7.45827500                                             | 3.62541300  | 2.85530900  | H                          | -1.63393500                                             | 2.63401400  | 7.05651400  |
| H          | -2.16573700                                             | 0.72530100  | 4.17290300  | S                          | -3.43818200                                             | 5.84999800  | 7.19264500  |
| H          | -1.78580300                                             | 2.46390900  | 4.32277400  | O                          | -4.62131900                                             | 5.93969300  | 8.04790500  |
| H          | -2.83723000                                             | 1.67754200  | 5.53158600  | O                          | -3.56659500                                             | 5.70663800  | 5.74366100  |
| N          | -1.10018600                                             | 5.16528600  | 6.91132600  | C                          | -2.27973800                                             | 7.16355600  | 7.59695600  |
| C          | -0.37198900                                             | 4.05397400  | 7.55401100  | H                          | -2.03609400                                             | 7.08888000  | 8.65893600  |
| H          | -1.01931600                                             | 3.17980800  | 7.60284100  | H                          | -1.39814500                                             | 7.03648900  | 6.96583700  |
| H          | 0.49789200                                              | 3.80027700  | 6.94717500  | H                          | -2.78849900                                             | 8.10274700  | 7.36398000  |
| H          | -0.04457900                                             | 4.34385500  | 8.55400100  | C                          | -1.59465700                                             | 1.84948100  | 9.79102600  |
| S          | -0.55451500                                             | 5.66760600  | 5.36503200  | C                          | -1.72572000                                             | 0.47958400  | 10.09754600 |
| O          | -1.46452100                                             | 6.74587200  | 4.95952100  | C                          | -0.30269100                                             | 2.41757000  | 9.80713000  |
| O          | -0.34690000                                             | 4.48324800  | 4.53250300  | C                          | -0.61272200                                             | -0.29154000 | 10.41344600 |
| C          | 1.04783800                                              | 6.40261700  | 5.73648900  | H                          | -2.71554300                                             | 0.03145500  | 10.08740800 |
| H          | 0.88914300                                              | 7.24803500  | 6.40743500  | C                          | 0.81358100                                              | 1.63845700  | 10.10301800 |
| H          | 1.70737000                                              | 5.65608600  | 6.18164000  | H                          | -0.17005600                                             | 3.47112200  | 9.57765000  |
| H          | 1.45522200                                              | 6.73914400  | 4.77974000  | C                          | 0.66295600                                              | 0.28413800  | 10.41172200 |
| C          | -3.88390000                                             | 7.41878400  | 6.60395300  | H                          | -0.73385700                                             | -1.34473700 | 10.64912000 |
| C          | -5.04483900                                             | 7.83537000  | 5.90099200  | H                          | 1.80183600                                              | 2.08864100  | 10.09252800 |
| C          | -3.23934500                                             | 8.35411600  | 7.45940900  | H                          | 1.53381600                                              | -0.32173900 | 10.64362200 |
| C          | -5.54640200                                             | 9.11905900  | 6.05572800  |                            |                                                         |             |             |
| H          | -5.53755300                                             | 7.12632800  | 5.24358800  | <b>Gy</b>                  | $E_{M06}(\text{trifluoromethylbenzene}) = -1830.635779$ |             |             |
| C          | -3.73629500                                             | 9.63828900  | 7.60314900  | C                          | -2.48769600                                             | 2.61847100  | 9.70135800  |
| H          | -2.34711200                                             | 8.05419800  | 7.99718900  | C                          | -2.29903000                                             | 3.86169000  | 8.96671500  |

|            |                                                         |             |             |                             |                                                         |             |             |
|------------|---------------------------------------------------------|-------------|-------------|-----------------------------|---------------------------------------------------------|-------------|-------------|
| C          | -2.80892000                                             | 4.63337300  | 10.92805700 | F                           | -6.97513600                                             | -1.37319300 | -7.95585200 |
| C          | -2.89813300                                             | 5.49159400  | 12.08214600 | O                           | -2.04290400                                             | 1.13838600  | -5.45393800 |
| C          | -2.58925300                                             | 4.91063200  | 13.29054600 | O                           | -2.75561300                                             | -1.23264900 | -5.99964900 |
| C          | -2.20038000                                             | 3.52537000  | 13.43627000 | O                           | -4.27325700                                             | -0.77476300 | -8.97536100 |
| C          | -2.25888400                                             | 2.66975000  | 12.38639900 | O                           | -5.63855700                                             | 1.36958000  | -8.74037300 |
| C          | -2.86862500                                             | 3.14787700  | 11.10817300 | C                           | -5.02958000                                             | 3.83713800  | -5.14615300 |
| C          | -3.11137000                                             | 6.95598000  | 11.97874600 | C                           | -4.04003900                                             | 4.22870100  | -4.15154600 |
| H          | -2.57350900                                             | 5.53971200  | 14.17910000 | C                           | -2.80556800                                             | 3.94872900  | -5.90879200 |
| H          | -1.85460700                                             | 3.18608100  | 14.40752500 | C                           | -1.73214600                                             | 3.92697200  | -6.84573600 |
| H          | -1.98617100                                             | 1.62256900  | 12.47577100 | C                           | -2.06875300                                             | 4.04249300  | -8.18289900 |
| H          | -3.95039200                                             | 2.94001200  | 11.27302700 | C                           | -3.41410000                                             | 4.17212300  | -8.64361500 |
| H          | -3.16738000                                             | 7.47502100  | 12.95975800 | C                           | -4.46157700                                             | 4.05382100  | -7.77282700 |
| N          | -2.59462200                                             | 5.00036400  | 9.69495200  | C                           | -4.16461500                                             | 3.67243500  | -6.38644100 |
| O          | -3.21898600                                             | 7.56893100  | 10.93611100 | C                           | -0.32259900                                             | 3.79009000  | -6.41803300 |
| C          | -6.17045700                                             | 1.75777000  | 7.70724800  | H                           | -1.25131900                                             | 4.04435300  | -8.89911800 |
| C          | -7.86403600                                             | 0.69426600  | 6.66731400  | H                           | -3.59804200                                             | 4.32265100  | -9.70219400 |
| C          | -8.20205600                                             | 2.00643500  | 6.76916500  | H                           | -5.49201400                                             | 4.05506400  | -8.11014400 |
| H          | -8.38924200                                             | -0.14191500 | 6.23247100  | H                           | -4.08620600                                             | 2.52612300  | -6.61259900 |
| H          | -9.08368900                                             | 2.53681500  | 6.44446700  | H                           | -0.18052900                                             | 3.64333900  | -5.33025300 |
| C          | -5.89322200                                             | -0.70968800 | 7.32234200  | N                           | -2.75158500                                             | 4.20452000  | -4.60658000 |
| C          | -7.13157300                                             | 4.07067600  | 7.74407700  | O                           | 0.61979900                                              | 3.80435200  | -7.18953800 |
| N          | -7.15226400                                             | 2.64356500  | 7.40588400  | C                           | -5.23969900                                             | -0.10139800 | -3.41014500 |
| N          | -6.61474500                                             | 0.55952900  | 7.24898500  | C                           | -5.98838600                                             | -2.14569000 | -2.81695800 |
| Au         | -4.39975600                                             | 2.17814500  | 8.64480600  | C                           | -4.64873900                                             | -2.11630900 | -2.59940700 |
| H          | -6.13450100                                             | 4.47480700  | 7.57098200  | H                           | -6.71626900                                             | -2.92797700 | -2.66866200 |
| H          | -7.84552200                                             | 4.58985000  | 7.10252000  | H                           | -3.97405800                                             | -2.86909200 | -2.22309200 |
| H          | -7.41608800                                             | 4.20967800  | 8.79057100  | C                           | -7.69555500                                             | -0.53468600 | -3.68912300 |
| H          | -4.94004000                                             | -0.54813000 | 7.82591500  | C                           | -2.80637800                                             | -0.44101800 | -2.85236500 |
| H          | -6.48287500                                             | -1.43781800 | 7.88557900  | N                           | -4.20850300                                             | -0.85549000 | -2.95782200 |
| H          | -5.70823300                                             | -1.08889800 | 6.31382300  | N                           | -6.33663200                                             | -0.89803100 | -3.30548100 |
| N          | -1.89598600                                             | 4.06527600  | 7.69056200  | Au                          | -5.13753300                                             | 1.78035500  | -4.20050500 |
| C          | -1.49481000                                             | 2.94828700  | 6.82433200  | H                           | -2.21050300                                             | -1.02709500 | -3.55280100 |
| H          | -2.33195900                                             | 2.25488700  | 6.66852100  | H                           | -2.46981700                                             | -0.59791600 | -1.82434200 |
| H          | -1.17650600                                             | 3.35199200  | 5.86493300  | H                           | -2.71713700                                             | 0.61225100  | -3.10391700 |
| H          | -0.66955500                                             | 2.41495800  | 7.29374400  | H                           | -8.38281000                                             | -0.79332600 | -2.87916800 |
| S          | -2.70835200                                             | 5.43139100  | 6.82363200  | H                           | -7.98122800                                             | -1.05989000 | -4.60279900 |
| O          | -4.12973200                                             | 5.34574600  | 7.16113900  | H                           | -7.73448500                                             | 0.53905200  | -3.87056900 |
| O          | -2.25803900                                             | 5.27705200  | 5.44425000  | N                           | -4.24922300                                             | 4.58747900  | -2.83361800 |
| C          | -1.98119400                                             | 6.92393700  | 7.51832200  | C                           | -5.61413300                                             | 4.66187400  | -2.28995800 |
| H          | -2.35000100                                             | 7.06001200  | 8.53476100  | H                           | -6.16252600                                             | 5.44912800  | -2.80411800 |
| H          | -0.89596800                                             | 6.81313700  | 7.48152100  | H                           | -5.55039700                                             | 4.89521700  | -1.22926100 |
| H          | -2.30431900                                             | 7.72549700  | 6.84802800  | H                           | -6.14393000                                             | 3.70974600  | -2.42453700 |
| C          | -1.49588200                                             | 1.48662700  | 9.68663700  | S                           | -3.02446400                                             | 4.05831400  | -1.66877400 |
| C          | -1.89440400                                             | 0.14685500  | 9.79801300  | O                           | -3.60716600                                             | 4.34589100  | -0.35618100 |
| C          | -0.12097900                                             | 1.77931900  | 9.68996900  | O                           | -2.59532600                                             | 2.70011900  | -2.00037300 |
| C          | -0.94655500                                             | -0.87478200 | 9.88198700  | C                           | -1.67622300                                             | 5.21334000  | -1.95251500 |
| H          | -2.95379500                                             | -0.09556300 | 9.82027400  | H                           | -2.05148000                                             | 6.21942000  | -1.75875900 |
| C          | 0.82727200                                              | 0.75813000  | 9.76178100  | H                           | -1.34607900                                             | 5.08920800  | -2.98239100 |
| H          | 0.20690400                                              | 2.81508100  | 9.63452800  | H                           | -0.89765400                                             | 4.94388500  | -1.23435500 |
| C          | 0.41672300                                              | -0.57336600 | 9.85614800  | C                           | -6.37228100                                             | 4.46075400  | -5.37923700 |
| H          | -1.27442500                                             | -1.90711500 | 9.96392000  | C                           | -6.55033900                                             | 5.84455600  | -5.21881100 |
| H          | 1.88504900                                              | 1.00450000  | 9.74950500  | C                           | -7.42755000                                             | 3.70917000  | -5.92003200 |
| H          | 1.15327500                                              | -1.36908100 | 9.91388100  | C                           | -7.76760700                                             | 6.45113200  | -5.53227000 |
|            |                                                         |             |             | H                           | -5.72220800                                             | 6.44912500  | -4.85606000 |
|            |                                                         |             |             | C                           | -8.63952900                                             | 4.31830000  | -6.24803300 |
|            |                                                         |             |             | H                           | -7.28615000                                             | 2.64830400  | -6.10307400 |
|            |                                                         |             |             | C                           | -8.81947400                                             | 5.68835800  | -6.04338700 |
|            |                                                         |             |             | H                           | -7.88758500                                             | 7.52173400  | -5.38924400 |
|            |                                                         |             |             | H                           | -9.44307200                                             | 3.71926900  | -6.66785200 |
|            |                                                         |             |             | H                           | -9.76587300                                             | 6.15966800  | -6.29326600 |
| <b>Gy1</b> | $E_{M06(\text{trifluoromethylbenzene})} = -3657.877893$ |             |             | <b>TS<sub>Gy1-Gy2</sub></b> | $E_{M06(\text{trifluoromethylbenzene})} = -3657.872826$ |             |             |
| N          | -3.93148800                                             | 0.87781200  | -7.00558800 | N                           | -3.87852200                                             | 0.97609000  | -7.01213600 |
| S          | -2.59398200                                             | 0.16595500  | -6.40870900 | S                           | -2.55274700                                             | 0.23277700  | -6.37847000 |
| S          | -4.90193800                                             | 0.25183700  | -8.14461900 | S                           | -4.83703500                                             | 0.30226800  | -8.15533300 |
| C          | -1.36855600                                             | 0.15222700  | -7.85149800 |                             |                                                         |             |             |
| C          | -6.20418500                                             | -0.64768000 | -7.14318200 |                             |                                                         |             |             |
| F          | -1.37713800                                             | -1.02832600 | -8.45749400 |                             |                                                         |             |             |
| F          | -1.68419000                                             | 1.11004100  | -8.73257900 |                             |                                                         |             |             |
| F          | -0.15044900                                             | 0.39696700  | -7.36102000 |                             |                                                         |             |             |
| F          | -5.65663600                                             | -1.45063000 | -6.22593500 |                             |                                                         |             |             |
| F          | -6.98991600                                             | 0.24760100  | -6.50441400 |                             |                                                         |             |             |

|    |             |             |             |            |                                                         |             |             |
|----|-------------|-------------|-------------|------------|---------------------------------------------------------|-------------|-------------|
| C  | -1.30205800 | 0.19647200  | -7.80614000 | H          | -9.47358400                                             | 3.80033200  | -6.56176500 |
| C  | -6.15034800 | -0.59604100 | -7.16302900 | H          | -9.70515200                                             | 6.25716000  | -6.22983500 |
| F  | -1.26339100 | -1.01384400 | -8.34743600 |            |                                                         |             |             |
| F  | -1.63479400 | 1.09541800  | -8.73729500 | <b>Gy2</b> | $E_{M06}(\text{trifluoromethylbenzene}) = -1830.243463$ |             |             |
| F  | -0.10504800 | 0.50610200  | -7.30467600 | C          | -5.06002000                                             | 3.87659200  | -4.95066300 |
| F  | -5.61765800 | -1.38343500 | -6.22682200 | C          | -3.78081700                                             | 4.29388300  | -4.28883700 |
| F  | -6.95829300 | 0.29912600  | -6.55830400 | C          | -3.15687300                                             | 3.82884800  | -6.31099200 |
| F  | -6.88911500 | -1.33571100 | -7.99201500 | C          | -2.38505500                                             | 3.61881800  | -7.46908700 |
| O  | -2.01434800 | 1.18836000  | -5.40645100 | C          | -3.05897300                                             | 3.28661300  | -8.65728000 |
| O  | -2.77351200 | -1.16187100 | -5.99306500 | C          | -4.44911200                                             | 3.16772600  | -8.69257300 |
| O  | -4.15998400 | -0.73329200 | -8.93204200 | C          | -5.21478000                                             | 3.35471300  | -7.53130100 |
| O  | -5.57311100 | 1.39155000  | -8.79617500 | C          | -4.56400800                                             | 3.65861400  | -6.33968400 |
| C  | -5.00972900 | 3.80225700  | -5.16760900 | C          | -0.91761600                                             | 3.74712600  | -7.45094500 |
| C  | -3.99185800 | 4.21440300  | -4.19088000 | H          | -2.46059600                                             | 3.13331700  | -9.55034500 |
| C  | -2.80916900 | 3.94130000  | -5.98101900 | H          | -4.94530600                                             | 2.92528400  | -9.62859900 |
| C  | -1.76119000 | 3.92986600  | -6.93759700 | H          | -6.29783700                                             | 3.26076400  | -7.55586300 |
| C  | -2.12608100 | 3.99665300  | -8.27780000 | H          | -0.48613600                                             | 4.00730600  | -6.46274600 |
| C  | -3.47460200 | 4.07350000  | -8.70570700 | N          | -2.71338700                                             | 4.21819200  | -5.05420400 |
| C  | -4.50089800 | 3.96910400  | -7.79368100 | O          | -0.19669100                                             | 3.58419800  | -8.42363900 |
| C  | -4.16787400 | 3.66761300  | -6.41817100 | C          | -5.10097500                                             | -0.06624600 | -3.42399000 |
| C  | -0.34083800 | 3.84927300  | -6.53721100 | C          | -5.17090600                                             | -2.31756400 | -3.23669200 |
| H  | -1.32218400 | 4.00063000  | -9.00875600 | C          | -4.85918800                                             | -1.81243200 | -2.01425600 |
| H  | -3.69593600 | 4.17801300  | -9.76245100 | H          | -5.29818800                                             | -3.33474000 | -3.57294200 |
| H  | -5.53883400 | 3.94892500  | -8.10580000 | H          | -4.66055300                                             | -2.30477700 | -1.07510700 |
| H  | -4.04229000 | 2.42389700  | -6.68356000 | C          | -5.63388600                                             | -1.34800600 | -5.50726000 |
| H  | -0.17126600 | 3.75011200  | -5.44783500 | C          | -4.49510800                                             | 0.50964100  | -1.07658900 |
| N  | -2.72700900 | 4.19930400  | -4.66673300 | N          | -4.82232200                                             | -0.43581500 | -2.14798300 |
| O  | 0.58605600  | 3.85819700  | -7.32850600 | N          | -5.31667800                                             | -1.23312900 | -4.08699200 |
| C  | -5.28303100 | -0.10572100 | -3.40889200 | Au         | -5.12262800                                             | 1.85110300  | -4.15238600 |
| C  | -6.07423200 | -2.12783500 | -2.79057200 | H          | -4.29868600                                             | -0.05373000 | -0.16252100 |
| C  | -4.73654300 | -2.11844000 | -2.55921300 | H          | -5.33859200                                             | 1.18472500  | -0.91434000 |
| H  | -6.81767900 | -2.89398600 | -2.63517400 | H          | -3.61575600                                             | 1.09121500  | -1.35799900 |
| H  | -4.08003300 | -2.87569200 | -2.16027900 | H          | -6.59718300                                             | -1.85048100 | -5.63474900 |
| C  | -7.73896100 | -0.50313900 | -3.72199800 | H          | -4.85249100                                             | -1.91803500 | -6.01784300 |
| C  | -2.86155700 | -0.48078900 | -2.82878900 | H          | -5.68601000                                             | -0.34673900 | -5.93555900 |
| N  | -4.27024500 | -0.87167700 | -2.93479300 | N          | -3.64059600                                             | 4.62223300  | -2.92797300 |
| N  | -6.39471800 | -0.88223900 | -3.30335200 | C          | -4.84409800                                             | 4.87967300  | -2.12446200 |
| Au | -5.14914300 | 1.76744600  | -4.22012500 | H          | -5.37187600                                             | 5.72872200  | -2.55870900 |
| H  | -2.27224400 | -1.08730800 | -3.51776400 | H          | -4.53955300                                             | 5.12218700  | -1.10790400 |
| H  | -2.53070100 | -0.62906500 | -1.79771700 | H          | -5.51899700                                             | 4.01352300  | -2.10971400 |
| H  | -2.75243600 | 0.56764700  | -3.09271400 | S          | -2.35542300                                             | 3.81102300  | -2.09287900 |
| H  | -8.45366800 | -0.78262300 | -2.94356500 | O          | -2.58610400                                             | 4.05365900  | -0.66270300 |
| H  | -7.99627600 | -1.00077800 | -4.65959300 | O          | -2.22925300                                             | 2.42268100  | -2.56341900 |
| H  | -7.76888700 | 0.57580400  | -3.87282900 | C          | -0.90698400                                             | 4.73178200  | -2.62205400 |
| N  | -4.19002900 | 4.55985600  | -2.86329400 | H          | -1.01289400                                             | 5.75590000  | -2.26061100 |
| C  | -5.54990000 | 4.65676500  | -2.31111200 | H          | -0.88348900                                             | 4.68735900  | -3.71140700 |
| H  | -6.08333700 | 5.46269300  | -2.81236400 | H          | -0.04314400                                             | 4.24054400  | -2.16758500 |
| H  | -5.47476500 | 4.87617800  | -1.24811300 | C          | -6.30343700                                             | 4.73036000  | -4.83721300 |
| H  | -6.10287100 | 3.71912600  | -2.45253400 | C          | -6.19802600                                             | 6.10363000  | -5.12272800 |
| S  | -2.96602100 | 4.01353700  | -1.71727900 | C          | -7.56611000                                             | 4.22130500  | -4.50995800 |
| O  | -3.53044700 | 4.29656500  | -0.39501100 | C          | -7.30968900                                             | 6.94174100  | -5.05892900 |
| O  | -2.55030800 | 2.65313400  | -2.05954000 | H          | -5.22611200                                             | 6.50950100  | -5.39438000 |
| C  | -1.60754000 | 5.15427000  | -2.00876100 | C          | -8.68613400                                             | 5.05610000  | -4.45431200 |
| H  | -1.96613500 | 6.16250200  | -1.79555200 | H          | -7.66815900                                             | 3.16261800  | -4.28830600 |
| H  | -1.29999700 | 5.03955000  | -3.04698000 | C          | -8.56214200                                             | 6.41944200  | -4.72203700 |
| H  | -0.81859800 | 4.86561100  | -1.30969800 | H          | -7.20004500                                             | 8.00127500  | -5.27579300 |
| C  | -6.34132700 | 4.46392700  | -5.38009800 | H          | -9.65538500                                             | 4.63738500  | -4.19534200 |
| C  | -6.47106600 | 5.85569600  | -5.24255400 | H          | -9.43140900                                             | 7.06975700  | -4.67194600 |
| C  | -7.43713400 | 3.73894500  | -5.87297100 |            |                                                         |             |             |
| C  | -7.67632300 | 6.49628000  | -5.53279200 | <b>Gy3</b> | $E_{M06}(\text{trifluoromethylbenzene}) = -3657.909305$ |             |             |
| H  | -5.61448200 | 6.43904700  | -4.91234100 | N          | -0.45424600                                             | 3.99437700  | -2.85103700 |
| C  | -8.63836900 | 4.38082100  | -6.17901600 | S          | 0.79137800                                              | 4.83598700  | -2.05377100 |
| H  | -7.33617600 | 2.67010800  | -6.03514300 | S          | -0.71470200                                             | 2.36507000  | -2.71724600 |
| C  | -8.76758800 | 5.75957000  | -5.99811500 | C          | 2.35409100                                              | 4.33778800  | -3.02885100 |
| H  | -7.75721200 | 7.57276700  | -5.40713400 | C          | -1.99102000                                             | 2.26653800  | -1.35278700 |



|    |             |             |             |                             |                                                |                       |             |
|----|-------------|-------------|-------------|-----------------------------|------------------------------------------------|-----------------------|-------------|
| F  | 3.29403300  | 4.02458000  | -2.13464200 |                             |                                                |                       |             |
| F  | 2.12944400  | 3.28714900  | -3.81426400 |                             |                                                |                       |             |
| F  | 2.75947100  | 5.37175300  | -3.75209400 |                             |                                                |                       |             |
| F  | -1.53235900 | 2.79416300  | -0.23163400 |                             |                                                |                       |             |
| F  | -3.11939500 | 2.88977700  | -1.71731000 |                             |                                                |                       |             |
| F  | -2.27811300 | 0.96475400  | -1.15627800 |                             |                                                |                       |             |
| O  | 0.56482500  | 6.24500100  | -2.30775800 |                             |                                                |                       |             |
| O  | 0.95012600  | 4.27048400  | -0.72280000 |                             |                                                |                       |             |
| O  | 0.45153000  | 1.66742000  | -2.19852800 |                             |                                                |                       |             |
| O  | -1.40367600 | 1.92886800  | -3.93032900 |                             |                                                |                       |             |
| C  | -4.57362200 | 4.22804700  | -5.26485500 |                             |                                                |                       |             |
| C  | -3.61527400 | 4.80309300  | -4.29342800 |                             |                                                |                       |             |
| C  | -2.36276400 | 4.36150300  | -6.01290100 |                             |                                                |                       |             |
| C  | -1.27157500 | 4.20352200  | -6.89095600 |                             |                                                |                       |             |
| C  | -1.54454000 | 3.76932000  | -8.20189300 |                             |                                                |                       |             |
| C  | -2.84356900 | 3.49313900  | -8.63124600 |                             |                                                |                       |             |
| C  | -3.92238100 | 3.62233300  | -7.74682600 |                             |                                                |                       |             |
| C  | -3.67680300 | 4.04492000  | -6.44331300 |                             |                                                |                       |             |
| C  | 0.11879300  | 4.49984100  | -6.52307000 |                             |                                                |                       |             |
| H  | -0.71393200 | 3.65973200  | -8.89613500 |                             |                                                |                       |             |
| H  | -3.01978100 | 3.17899300  | -9.65610300 |                             |                                                |                       |             |
| H  | -4.93743300 | 3.40085500  | -8.06707300 |                             |                                                |                       |             |
| H  | -1.01022500 | 4.48060400  | -3.62930300 |                             |                                                |                       |             |
| H  | 0.84413000  | 4.35658300  | -7.35682900 |                             |                                                |                       |             |
| N  | -2.35365600 | 4.79370400  | -4.69230000 |                             |                                                |                       |             |
| O  | 0.51315700  | 4.87549900  | -5.43251400 |                             |                                                |                       |             |
| C  | -4.18224500 | 0.23868200  | -3.91280400 |                             |                                                |                       |             |
| C  | -3.12372000 | -1.73597000 | -3.65320700 |                             |                                                |                       |             |
| C  | -3.90208200 | -1.54402600 | -2.55607000 |                             |                                                |                       |             |
| H  | -2.46644600 | -2.54805300 | -3.92161500 |                             |                                                |                       |             |
| H  | -4.05739400 | -2.15469500 | -1.68063100 |                             |                                                |                       |             |
| C  | -2.59050400 | -0.39892900 | -5.72475800 |                             |                                                |                       |             |
| C  | -5.40670700 | 0.30641600  | -1.74553400 |                             |                                                |                       |             |
| N  | -4.55222100 | -0.33479200 | -2.73944300 |                             |                                                |                       |             |
| N  | -3.31690100 | -0.64056700 | -4.47682900 |                             |                                                |                       |             |
| Au | -4.53682600 | 2.14272200  | -4.56824900 |                             |                                                |                       |             |
| H  | -6.15679000 | 0.90914500  | -2.25928500 |                             |                                                |                       |             |
| H  | -4.80363100 | 0.94949000  | -1.10096900 |                             |                                                |                       |             |
| H  | -5.90190100 | -0.46188800 | -1.14758100 |                             |                                                |                       |             |
| H  | -2.27738300 | -1.35846500 | -6.14166900 |                             |                                                |                       |             |
| H  | -1.72495600 | 0.23474000  | -5.52450200 |                             |                                                |                       |             |
| H  | -3.25019800 | 0.10829700  | -6.43042000 |                             |                                                |                       |             |
| N  | -4.00471700 | 5.30793800  | -3.05826500 |                             |                                                |                       |             |
| C  | -5.21116900 | 4.84131100  | -2.36710100 |                             |                                                |                       |             |
| H  | -6.06519800 | 5.50009400  | -2.55113400 |                             |                                                |                       |             |
| H  | -5.00248400 | 4.77056800  | -1.29627300 |                             |                                                |                       |             |
| H  | -5.45957300 | 3.84256800  | -2.73023400 |                             |                                                |                       |             |
| S  | -3.03864900 | 6.44379200  | -2.18967600 |                             |                                                |                       |             |
| O  | -2.55061100 | 5.78418300  | -0.97630400 |                             |                                                |                       |             |
| O  | -2.15062000 | 7.11017700  | -3.12859100 |                             |                                                |                       |             |
| C  | -4.30096600 | 7.64694200  | -1.70426700 |                             |                                                |                       |             |
| H  | -4.99740100 | 7.21170400  | -0.98742100 |                             |                                                |                       |             |
| H  | -4.81663900 | 7.99045400  | -2.60298200 |                             |                                                |                       |             |
| H  | -3.74923300 | 8.46863100  | -1.24159400 |                             |                                                |                       |             |
| C  | -5.90550500 | 4.90156200  | -5.45856700 |                             |                                                |                       |             |
| C  | -5.99016500 | 6.30318500  | -5.38020300 |                             |                                                |                       |             |
| C  | -7.07304100 | 4.18549900  | -5.75771600 |                             |                                                |                       |             |
| C  | -7.20459300 | 6.96199300  | -5.57121800 |                             |                                                |                       |             |
| H  | -5.09005000 | 6.87770500  | -5.17544100 |                             |                                                |                       |             |
| C  | -8.28784600 | 4.84319800  | -5.96392800 |                             |                                                |                       |             |
| H  | -7.02442300 | 3.10126600  | -5.81877900 |                             |                                                |                       |             |
| C  | -8.36080900 | 6.23343500  | -5.86318800 |                             |                                                |                       |             |
| H  | -7.24594800 | 8.04623900  | -5.50290500 |                             |                                                |                       |             |
| H  | -9.17951200 | 4.26585800  | -6.19479900 |                             |                                                |                       |             |
| H  | -9.30735200 | 6.74536800  | -6.01428300 |                             |                                                |                       |             |
|    |             |             |             | <b>TS<sub>Gy3-Gy4</sub></b> | <b>E<sub>M06</sub>(trifluoromethylbenzene)</b> | <b>= -3657.905985</b> |             |
|    |             |             |             | N                           | -0.61842900                                    | 4.34331800            | -2.65237200 |
|    |             |             |             | S                           | 0.56220400                                     | 5.25448200            | -1.84238100 |
|    |             |             |             | S                           | -0.98260900                                    | 2.82614300            | -2.13078700 |
|    |             |             |             | C                           | 0.78957300                                     | 6.69838100            | -3.05778600 |
|    |             |             |             | C                           | -0.31169500                                    | 1.77039600            | -3.52264400 |
|    |             |             |             | F                           | 1.88291400                                     | 6.52308100            | -3.77953400 |
|    |             |             |             | F                           | -0.27246900                                    | 6.86067200            | -3.85637500 |
|    |             |             |             | F                           | 0.92773000                                     | 7.79373000            | -2.30619900 |
|    |             |             |             | F                           | -0.91816400                                    | 2.07953200            | -4.68004200 |
|    |             |             |             | F                           | 0.99637400                                     | 1.93735200            | -3.64942500 |
|    |             |             |             | F                           | -0.57755800                                    | 0.48223700            | -3.24368700 |
|    |             |             |             | O                           | -0.03967500                                    | 5.85806200            | -0.65451500 |
|    |             |             |             | O                           | 1.83925200                                     | 4.55707200            | -1.77997200 |
|    |             |             |             | O                           | -2.43423800                                    | 2.65198200            | -2.20163200 |
|    |             |             |             | O                           | -0.23259000                                    | 2.45478200            | -0.93886800 |
|    |             |             |             | C                           | -4.47368600                                    | 4.31356100            | -5.25364100 |
|    |             |             |             | C                           | -3.60187300                                    | 4.82102000            | -4.19609400 |
|    |             |             |             | C                           | -2.24092000                                    | 4.54149100            | -5.90766200 |
|    |             |             |             | C                           | -1.12702300                                    | 4.43306300            | -6.76920300 |
|    |             |             |             | C                           | -1.37414000                                    | 4.15698800            | -8.12725100 |
|    |             |             |             | C                           | -2.66412500                                    | 3.95250800            | -8.62013300 |
|    |             |             |             | C                           | -3.75780600                                    | 3.98297500            | -7.75101700 |
|    |             |             |             | C                           | -3.53945800                                    | 4.26070100            | -6.40215200 |
|    |             |             |             | C                           | 0.27345100                                     | 4.51590400            | -6.34186100 |
|    |             |             |             | H                           | -0.52436900                                    | 4.09229500            | -8.80324500 |
|    |             |             |             | H                           | -2.81581300                                    | 3.75509100            | -9.67736300 |
|    |             |             |             | H                           | -4.76626900                                    | 3.79307500            | -8.10831500 |
|    |             |             |             | H                           | -1.28367400                                    | 4.70473600            | -3.55864300 |
|    |             |             |             | H                           | 1.00261300                                     | 4.48867100            | -7.18319000 |
|    |             |             |             | N                           | -2.30738300                                    | 4.87467700            | -4.55490800 |
|    |             |             |             | O                           | 0.67289500                                     | 4.57246100            | -5.19224800 |
|    |             |             |             | C                           | -3.79489800                                    | 0.28899100            | -4.04634400 |
|    |             |             |             | C                           | -2.76201000                                    | -1.70891900           | -3.84865500 |
|    |             |             |             | C                           | -3.36223900                                    | -1.43616100           | -2.66117100 |
|    |             |             |             | H                           | -2.17207800                                    | -2.55345400           | -4.16862700 |
|    |             |             |             | H                           | -3.40255300                                    | -1.99844700           | -1.74143800 |
|    |             |             |             | C                           | -2.47339500                                    | -0.47804300           | -6.02098500 |
|    |             |             |             | C                           | -4.67513700                                    | 0.48473000            | -1.70839200 |
|    |             |             |             | N                           | -3.99574600                                    | -0.21384500           | -2.80239300 |
|    |             |             |             | N                           | -3.04480700                                    | -0.64505900           | -4.68856900 |
|    |             |             |             | Au                          | -4.25851100                                    | 2.16572700            | -4.68223500 |
|    |             |             |             | H                           | -5.35109400                                    | 1.23199500            | -2.12091900 |
|    |             |             |             | H                           | -3.93648900                                    | 0.99692900            | -1.08876900 |
|    |             |             |             | H                           | -5.23569800                                    | -0.24432000           | -1.11817700 |
|    |             |             |             | H                           | -2.42460200                                    | -1.44968700           | -6.51832800 |
|    |             |             |             | H                           | -1.47252000                                    | -0.04618500           | -5.94193200 |
|    |             |             |             | H                           | -3.10665200                                    | 0.19878900            | -6.59540900 |
|    |             |             |             | N                           | -4.00051900                                    | 5.33101700            | -2.96379300 |
|    |             |             |             | C                           | -3.10028800                                    | 6.21667300            | -2.19419800 |
|    |             |             |             | H                           | -2.51378700                                    | 5.66803900            | -1.45886400 |
|    |             |             |             | H                           | -3.69661400                                    | 6.97472400            | -1.67999800 |
|    |             |             |             | H                           | -2.43984800                                    | 6.71236300            | -2.90269700 |
|    |             |             |             | S                           | -5.31532200                                    | 4.72887900            | -2.02256800 |
|    |             |             |             | O                           | -5.85867800                                    | 3.51180300            | -2.62563900 |
|    |             |             |             | O                           | -4.86160700                                    | 4.73078300            | -0.63389100 |
|    |             |             |             | C                           | -6.54413700                                    | 6.03434800            | -2.20725500 |
|    |             |             |             | H                           | -6.87703900                                    | 6.06885400            | -3.24377800 |
|    |             |             |             | H                           | -6.09734500                                    | 6.98192200            | -1.90076000 |
|    |             |             |             | H                           | -7.36749200                                    | 5.77366900            | -1.53785200 |
|    |             |             |             | C                           | -5.84254300                                    | 4.90409400            | -5.45147900 |
|    |             |             |             | C                           | -5.93097600                                    | 6.27319300            | -5.75927700 |
|    |             |             |             | C                           | -7.02939900                                    | 4.16799900            | -5.34833100 |
|    |             |             |             | C                           | -7.16740900                                    | 6.89278200            | -5.94042400 |

|   |             |            |             |
|---|-------------|------------|-------------|
| H | -5.01478500 | 6.85184600 | -5.85020800 |
| C | -8.26988800 | 4.78383300 | -5.53120100 |
| H | -6.97685900 | 3.11488000 | -5.09392500 |
| C | -8.34438500 | 6.14748600 | -5.82236900 |
| H | -7.21246700 | 7.95365900 | -6.17239100 |
| H | -9.17932700 | 4.19618800 | -5.43840000 |
| H | -9.31043600 | 6.62596900 | -5.95935300 |

**Gy4**  $E_{M06(\text{trifluoromethylbenzene})} = -1830.701042$

|    |             |             |             |
|----|-------------|-------------|-------------|
| C  | -4.84113300 | 3.80957900  | -4.73773700 |
| C  | -3.54979900 | 4.07217700  | -4.11964600 |
| C  | -3.07495000 | 3.41698900  | -6.23993200 |
| C  | -2.41142800 | 3.03284400  | -7.41204900 |
| C  | -3.21900700 | 2.72231600  | -8.51869000 |
| C  | -4.61304600 | 2.79887200  | -8.44913300 |
| C  | -5.25576000 | 3.16209100  | -7.26036500 |
| C  | -4.47526400 | 3.45577000  | -6.14158000 |
| C  | -0.93624400 | 2.95434200  | -7.51404100 |
| H  | -2.71996500 | 2.43149400  | -9.43748300 |
| H  | -5.20556300 | 2.57469200  | -9.33067300 |
| H  | -6.33848300 | 3.21756600  | -7.19945700 |
| H  | -0.36960600 | 3.24364400  | -6.60028400 |
| N  | -2.55136100 | 3.80904800  | -5.00065300 |
| O  | -0.34606500 | 2.60013300  | -8.51366300 |
| C  | -5.32895900 | -0.23976800 | -3.47976200 |
| C  | -5.38582800 | -2.48807000 | -3.62974300 |
| C  | -5.74321800 | -2.15310900 | -2.36278800 |
| H  | -5.28588900 | -3.45123400 | -4.10584400 |
| H  | -6.02411400 | -2.76606300 | -1.52032800 |
| C  | -4.67223000 | -1.24144800 | -5.68924300 |
| C  | -6.05062200 | -0.01670200 | -1.08513800 |
| N  | -5.70208500 | -0.77100900 | -2.28841100 |
| N  | -5.13922300 | -1.30370300 | -4.30258300 |
| Au | -5.08302200 | 1.72290900  | -3.98516900 |
| H  | -5.46809800 | -0.38950600 | -0.23913500 |
| H  | -7.11780900 | -0.12416200 | -0.87311700 |
| H  | -5.81724400 | 1.03519800  | -1.24877400 |
| H  | -5.21718700 | -1.97830400 | -6.28316000 |
| H  | -3.60045700 | -1.45324200 | -5.73466400 |
| H  | -4.86243100 | -0.24568600 | -6.09103400 |
| N  | -3.32236000 | 4.54033400  | -2.85042800 |
| C  | -4.42368500 | 4.65009800  | -1.87399400 |
| H  | -5.00377700 | 5.56181300  | -2.02984000 |
| H  | -3.99475400 | 4.63736800  | -0.87346100 |
| H  | -5.08091500 | 3.78536300  | -1.99634800 |
| S  | -1.74016300 | 5.08456200  | -2.33798400 |
| O  | -1.78438500 | 5.14526500  | -0.88677600 |
| O  | -0.75846200 | 4.25591000  | -3.04422100 |
| C  | -1.68390400 | 6.75048700  | -3.01505600 |
| H  | -2.48429400 | 7.33630800  | -2.55896600 |
| H  | -1.79747500 | 6.69133200  | -4.09970800 |
| H  | -0.70682300 | 7.16572900  | -2.75436300 |
| C  | -6.00714100 | 4.73880000  | -4.51612600 |
| C  | -5.78472500 | 6.12519100  | -4.56253400 |
| C  | -7.31802100 | 4.27723800  | -4.34150500 |
| C  | -6.83851900 | 7.02510800  | -4.40955000 |
| H  | -4.77637100 | 6.49940100  | -4.72703400 |
| C  | -8.37716900 | 5.17670100  | -4.19899200 |
| H  | -7.51330500 | 3.20850700  | -4.31442500 |
| C  | -8.14030800 | 6.55161000  | -4.22506800 |
| H  | -6.64608600 | 8.09361200  | -4.44393100 |
| H  | -9.38696200 | 4.80018400  | -4.06413400 |
| H  | -8.96345200 | 7.25021000  | -4.10907600 |
| H  | -1.58134500 | 3.73599500  | -4.70830200 |

**TS<sub>Gy4-Ay</sub>**  $E_{M06(\text{trifluoromethylbenzene})} = -1830.688524$

|    |             |             |            |
|----|-------------|-------------|------------|
| C  | -4.80172900 | 4.39096800  | 4.92993800 |
| C  | -3.58861200 | 4.53937200  | 4.24672100 |
| C  | -3.08348700 | 3.36947200  | 6.11900300 |
| C  | -2.45764000 | 2.61984700  | 7.13064300 |
| C  | -3.26012500 | 2.20264200  | 8.20151100 |
| C  | -4.62313800 | 2.52349200  | 8.26712800 |
| C  | -5.24128900 | 3.24186300  | 7.24297700 |
| C  | -4.47344100 | 3.65138200  | 6.14462200 |
| C  | -1.02422400 | 2.26157300  | 7.08905400 |
| H  | -2.78401100 | 1.62989300  | 8.99110600 |
| H  | -5.20485500 | 2.20845800  | 9.12785500 |
| H  | -6.29752300 | 3.48760000  | 7.28938000 |
| H  | -0.44059300 | 2.69602800  | 6.24494700 |
| N  | -2.56874700 | 3.93153200  | 4.96217900 |
| O  | -0.47894900 | 1.53892400  | 7.89852700 |
| C  | -5.15341100 | 0.09003200  | 3.57774700 |
| C  | -5.05948000 | -2.06011800 | 4.22770700 |
| C  | -5.42812800 | -2.04235500 | 2.91949200 |
| H  | -4.89751900 | -2.88328000 | 4.90603600 |
| H  | -5.66099600 | -2.84589500 | 2.23815800 |
| C  | -4.45404800 | -0.31486600 | 5.94621000 |
| C  | -5.87730100 | -0.26906200 | 1.19761800 |
| N  | -5.47916900 | -0.71362800 | 2.53473500 |
| N  | -4.89879800 | -0.74240400 | 4.61780000 |
| Au | -5.03026300 | 2.09197200  | 3.58796500 |
| H  | -5.32576000 | -0.84214200 | 0.44890300 |
| H  | -6.95141400 | -0.41986100 | 1.06036300 |
| H  | -5.64159600 | 0.78980100  | 1.08915700 |
| H  | -4.99649700 | 0.58296100  | 6.24195300 |
| H  | -4.66058900 | -1.11421700 | 6.65954600 |
| H  | -3.38313300 | -0.10010800 | 5.93722100 |
| N  | -3.30450900 | 5.29791600  | 3.10163300 |
| C  | -1.94182800 | 5.84624100  | 2.94834200 |
| H  | -1.21521200 | 5.09115900  | 2.62785900 |
| H  | -1.95312700 | 6.64012100  | 2.19920500 |
| H  | -1.64549900 | 6.28302100  | 3.90406100 |
| S  | -4.05592400 | 4.87016700  | 1.59729000 |
| O  | -5.18546900 | 3.97757900  | 1.91714600 |
| O  | -3.01643800 | 4.44478200  | 0.66228200 |
| C  | -4.75480700 | 6.43732700  | 1.07224300 |
| H  | -5.50144000 | 6.73144100  | 1.81159400 |
| H  | -3.95668600 | 7.17680500  | 0.98528400 |
| H  | -5.21096000 | 6.25886300  | 0.09548600 |
| C  | -6.04901100 | 5.15164900  | 4.68723000 |
| C  | -5.99359800 | 6.53162100  | 4.43198600 |
| C  | -7.30370700 | 4.52658600  | 4.75122600 |
| C  | -7.16420600 | 7.26191500  | 4.22365900 |
| H  | -5.03001800 | 7.03211400  | 4.41071200 |
| C  | -8.47396400 | 5.25818400  | 4.54658100 |
| H  | -7.36106100 | 3.45861800  | 4.94743200 |
| C  | -8.40789100 | 6.62652800  | 4.27644700 |
| H  | -7.10637400 | 8.33075000  | 4.03716000 |
| H  | -9.43681500 | 4.75800800  | 4.59434300 |
| H  | -9.31857800 | 7.19597600  | 4.11681300 |
| H  | -1.64709600 | 3.75614000  | 4.59110500 |

**PhC ≡ CNMeMs**  $E_{M06(\text{trifluoromethylbenzene})} = -990.701103$

|   |             |            |            |
|---|-------------|------------|------------|
| C | -2.69395800 | 3.33151700 | 8.63747900 |
| C | -2.99311900 | 3.65662800 | 7.50656700 |
| N | -3.32711000 | 4.03683500 | 6.25601900 |
| C | -2.42770000 | 3.69018100 | 5.14118200 |
| H | -2.25345200 | 2.61244500 | 5.17679100 |
| H | -2.92185700 | 3.94629100 | 4.20434500 |

|                                                                    |              |             |             |                                                                                     |             |             |              |
|--------------------------------------------------------------------|--------------|-------------|-------------|-------------------------------------------------------------------------------------|-------------|-------------|--------------|
| H                                                                  | -1.46621100  | 4.21501500  | 5.21450500  | C                                                                                   | -3.74533200 | 4.36587700  | 11.71665700  |
| S                                                                  | -4.27622500  | 5.47929700  | 6.13527000  | C                                                                                   | -3.74723300 | 4.25033900  | 13.11791000  |
| O                                                                  | -5.37533800  | 5.34770400  | 7.08339200  | C                                                                                   | -2.57563500 | 4.33495100  | 13.86058500  |
| O                                                                  | -4.49617400  | 5.69013200  | 4.70509100  | C                                                                                   | -1.37032300 | 4.56582100  | 13.19215200  |
| C                                                                  | -3.15576300  | 6.75700800  | 6.74917300  | C                                                                                   | -1.34190100 | 4.69727900  | 11.80515200  |
| H                                                                  | -2.83458800  | 6.47496500  | 7.75393400  | C                                                                                   | -5.04143200 | 4.26678700  | 11.03170500  |
| H                                                                  | -2.30561000  | 6.83481300  | 6.06820400  | H                                                                                   | -4.69729800 | 4.08842800  | 13.62225000  |
| H                                                                  | -3.71557600  | 7.69459800  | 6.77199700  | H                                                                                   | -2.59931400 | 4.23988300  | 14.94120700  |
| C                                                                  | -2.38544100  | 2.94277500  | 9.97349300  | H                                                                                   | -0.44443400 | 4.65596200  | 13.75320600  |
| C                                                                  | -1.10498100  | 2.45866500  | 10.30724400 | H                                                                                   | -0.41003000 | 4.92227300  | 11.29766800  |
| C                                                                  | -3.36217100  | 3.04447400  | 10.98487900 | H                                                                                   | -5.91388200 | 4.22703800  | 11.71777200  |
| C                                                                  | -0.81543100  | 2.08128800  | 11.61645900 | N                                                                                   | -2.42348400 | 4.83309900  | 9.67090800   |
| H                                                                  | -0.34840800  | 2.38083000  | 9.53212600  | O                                                                                   | -5.21240900 | 4.22626000  | 9.82326900   |
| C                                                                  | -3.05802900  | 2.67694300  | 12.29334000 | C                                                                                   | -6.02321400 | 1.45589200  | 7.32904500   |
| H                                                                  | -4.35081100  | 3.41327800  | 10.72932500 | C                                                                                   | -7.80099900 | 0.34611400  | 6.49660500   |
| C                                                                  | -1.78719300  | 2.19166200  | 12.61469600 | C                                                                                   | -8.06809600 | 1.67855500  | 6.41530300   |
| H                                                                  | 0.17448700   | 1.70450500  | 11.85955500 | H                                                                                   | -8.38663700 | -0.51326700 | 6.20927700   |
| H                                                                  | -3.81867900  | 2.76361500  | 13.06455600 | H                                                                                   | -8.93109900 | 2.20323800  | 6.03598800   |
| H                                                                  | -1.55602700  | 1.90095400  | 13.63570300 | C                                                                                   | -5.89907000 | -1.04777600 | 7.35156600   |
|                                                                    |              |             |             | C                                                                                   | -6.83514400 | 3.80206000  | 7.01098500   |
|                                                                    |              |             |             | N                                                                                   | -6.97155600 | 2.34028700  | 6.92842500   |
| <b>PAy</b> $E_{M06(\text{trifluoromethylbenzene})} = -1390.350938$ |              |             |             | N                                                                                   | -6.54255600 | 0.22970600  | 7.05606800   |
| C                                                                  | -6.11237600  | 1.69266600  | 5.59284200  | Au                                                                                  | -4.20639800 | 1.96009500  | 8.16267600   |
| C                                                                  | -5.39235200  | 0.75700800  | 4.87006500  | H                                                                                   | -6.04949800 | 4.14446200  | 6.33674100   |
| C                                                                  | -3.86906500  | 1.83992700  | 6.10567400  | H                                                                                   | -7.78766800 | 4.25177600  | 6.72708800   |
| C                                                                  | -2.68514700  | 2.29320200  | 6.72155800  | H                                                                                   | -6.57047800 | 4.08893700  | 8.02842800   |
| C                                                                  | -2.80330900  | 3.35206900  | 7.62907200  | H                                                                                   | -4.83274400 | -0.87899200 | 7.50388400   |
| C                                                                  | -4.04631300  | 3.94300500  | 7.90420700  | H                                                                                   | -6.33239800 | -1.49021000 | 8.25331300   |
| C                                                                  | -5.21188100  | 3.48103600  | 7.29249200  | H                                                                                   | -6.03870800 | -1.72784700 | 6.50802700   |
| C                                                                  | -5.14210900  | 2.40481600  | 6.39388200  | N                                                                                   | -2.03312600 | 4.48938500  | 7.40269100   |
| C                                                                  | -1.39542100  | 1.67479900  | 6.41298100  | C                                                                                   | -1.58565000 | 3.55858100  | 6.34815200   |
| H                                                                  | -1.90791100  | 3.72251700  | 8.12298100  | H                                                                                   | -2.41705200 | 3.01585500  | 5.88748900   |
| H                                                                  | -4.10056700  | 4.77286000  | 8.60231100  | H                                                                                   | -1.06024900 | 4.12570700  | 5.58066400   |
| H                                                                  | -6.16601000  | 3.95400300  | 7.50456300  | H                                                                                   | -0.89265900 | 2.84214300  | 6.79546400   |
| H                                                                  | -0.52082100  | 2.10637500  | 6.94511100  | H                                                                                   | -2.95579700 | 5.86841400  | 6.83257600   |
| N                                                                  | -4.04146700  | 0.85767200  | 5.17506400  | S                                                                                   | -4.33498300 | 5.72477700  | 7.29343000   |
| O                                                                  | -1.24866900  | 0.74598800  | 5.62788000  | O                                                                                   | -2.64308300 | 5.93392300  | 5.40639100   |
| N                                                                  | -5.88050800  | -0.19544000 | 3.95583600  | C                                                                                   | -2.17980400 | 7.25172900  | 7.67626200   |
| C                                                                  | -5.38295900  | -0.10270500 | 2.56936000  | H                                                                                   | -2.29648500 | 7.10281500  | 8.74940300   |
| H                                                                  | -4.30496600  | -0.29291000 | 2.48843300  | H                                                                                   | -1.12957000 | 7.28261600  | 7.38156400   |
| H                                                                  | -5.92097700  | -0.82318000 | 1.95300800  | H                                                                                   | -2.70336100 | 8.14861200  | 7.33515300   |
| H                                                                  | -5.59311800  | 0.91026900  | 2.21606400  | C                                                                                   | -1.41350900 | 1.82720200  | 9.58281900   |
| S                                                                  | -6.01094000  | -1.79550000 | 4.59027800  | C                                                                                   | -1.68620900 | 0.49576800  | 10.01415300  |
| O                                                                  | -4.85298200  | -2.09453800 | 5.44189000  | C                                                                                   | -0.12531300 | 2.37722200  | 9.85590100   |
| O                                                                  | -6.34349600  | -2.65799200 | 3.45353100  | C                                                                                   | -0.72891500 | -0.23606900 | 10.69512900  |
| C                                                                  | -7.45919200  | -1.61254000 | 5.64451000  | H                                                                                   | -2.66588300 | 0.07582100  | 9.80920400   |
| H                                                                  | -7.25552300  | -0.85043500 | 6.39736600  | C                                                                                   | 0.83410200  | 1.63353500  | 10.52211300  |
| H                                                                  | -8.30426900  | -1.31946000 | 5.02111100  | H                                                                                   | 0.10293700  | 3.38026100  | 9.51176000   |
| H                                                                  | -7.62606600  | -2.58492700 | 6.11342600  | C                                                                                   | 0.53002900  | 0.33176900  | 10.94654700  |
| C                                                                  | -7.57096400  | 1.87548200  | 5.57839500  | H                                                                                   | -0.94564300 | -1.24474000 | 11.03169800  |
| C                                                                  | -8.31032000  | 1.78029800  | 4.38567400  | H                                                                                   | 1.81595900  | 2.05296800  | 10.71659200  |
| C                                                                  | -8.26744400  | 2.10989900  | 6.77788700  | H                                                                                   | 1.28244200  | -0.24789200 | 11.47402200  |
| C                                                                  | -9.69792200  | 1.91068500  | 4.39523500  |                                                                                     |             |             |              |
| H                                                                  | -7.78838900  | 1.60477000  | 3.45126600  |                                                                                     |             |             |              |
| C                                                                  | -9.65570800  | 2.24889200  | 6.78422200  | <b>TS</b> <sub>Fy2-Iy</sub> $E_{M06(\text{trifluoromethylbenzene})} = -1830.603002$ |             |             |              |
| H                                                                  | -7.71603700  | 2.15591800  | 7.71254400  | C                                                                                   | -3.85786500 | 5.21751700  | -8.53422100  |
| C                                                                  | -10.37757800 | 2.14807100  | 5.59348500  | C                                                                                   | -2.63886200 | 5.65917500  | -7.75548100  |
| H                                                                  | -10.25029800 | 1.83516000  | 3.46225800  | C                                                                                   | -3.37126500 | 7.64996000  | -8.23169900  |
| H                                                                  | -10.17365800 | 2.42619500  | 7.72308200  | C                                                                                   | -3.93912600 | 7.00846400  | -9.40351300  |
| H                                                                  | -11.45898400 | 2.25289300  | 5.59776300  | C                                                                                   | -5.21387500 | 7.48583100  | -9.87189800  |
| H                                                                  | -3.31199200  | 0.20403500  | 4.91956100  | C                                                                                   | -5.82652000 | 8.53747900  | -9.24708500  |
|                                                                    |              |             |             | C                                                                                   | -5.17185400 | 9.22040400  | -8.17787200  |
|                                                                    |              |             |             | C                                                                                   | -3.94057500 | 8.82040600  | -7.69381400  |
| <b>Fy2</b> $E_{M06(\text{trifluoromethylbenzene})} = -1830.616154$ |              |             |             | C                                                                                   | -2.94597800 | 6.66210600  | -10.52580000 |
| C                                                                  | -2.40188500  | 2.56650900  | 8.88789800  | H                                                                                   | -5.62558700 | 7.03957600  | -10.77122500 |
| C                                                                  | -2.23086900  | 4.02117100  | 8.69685400  | H                                                                                   | -6.78443500 | 8.90637000  | -9.59950000  |
| C                                                                  | -2.51506200  | 4.58037600  | 11.03894500 |                                                                                     |             |             |              |

|                                                                   |             |             |              |                                                                                   |             |             |              |
|-------------------------------------------------------------------|-------------|-------------|--------------|-----------------------------------------------------------------------------------|-------------|-------------|--------------|
| H                                                                 | -5.66606300 | 10.07418200 | -7.72259200  | H                                                                                 | -3.28254600 | 0.50503800  | -2.72505600  |
| H                                                                 | -3.47294500 | 9.29824200  | -6.84195800  | H                                                                                 | -5.98341900 | 0.47822900  | -3.36356600  |
| H                                                                 | -1.90423300 | 6.52984900  | -10.18064400 | C                                                                                 | -1.91172800 | 2.65671200  | -3.90579300  |
| N                                                                 | -2.40401700 | 6.94366900  | -7.57677500  | C                                                                                 | -6.73987400 | 2.64638700  | -4.97564300  |
| O                                                                 | -3.27861300 | 6.55625400  | -11.67983500 | N                                                                                 | -5.43086900 | 2.27187600  | -4.43506800  |
| C                                                                 | -2.62834400 | 2.33036900  | -11.27132100 | N                                                                                 | -3.33379100 | 2.30192400  | -3.92379100  |
| C                                                                 | -1.15703800 | 1.08103700  | -12.43674200 | Au                                                                                | -4.02022800 | 4.63729100  | -5.76461900  |
| C                                                                 | -2.40620500 | 0.68660200  | -12.80001300 | H                                                                                 | -6.62825600 | 3.00760900  | -5.99946200  |
| H                                                                 | -0.18601300 | 0.73618200  | -12.75638000 | H                                                                                 | -7.19319400 | 3.42456000  | -4.35526000  |
| H                                                                 | -2.73673500 | -0.06114900 | -13.50408000 | H                                                                                 | -7.38278500 | 1.76465300  | -4.97720400  |
| C                                                                 | -0.20601300 | 2.76976300  | -10.82038400 | H                                                                                 | -1.41762000 | 2.08568500  | -3.11850700  |
| C                                                                 | -4.74617900 | 1.37789000  | -12.20751000 | H                                                                                 | -1.80676800 | 3.72266200  | -3.69460700  |
| N                                                                 | -3.29383200 | 1.46114200  | -12.07251900 | H                                                                                 | -1.46174400 | 2.43299700  | -4.87443800  |
| N                                                                 | -1.31170600 | 2.08934900  | -11.50275100 | N                                                                                 | -1.36585200 | 5.72289400  | -7.16274100  |
| Au                                                                | -3.34285100 | 3.74401500  | -9.95681100  | C                                                                                 | -1.00656400 | 6.49578500  | -5.96194700  |
| H                                                                 | -5.05811300 | 0.33201000  | -12.15395800 | H                                                                                 | 0.03427000  | 6.29259600  | -5.71836100  |
| H                                                                 | -5.06033800 | 1.80644300  | -13.16337300 | H                                                                                 | -1.64084800 | 6.22037000  | -5.11003100  |
| H                                                                 | -5.20735800 | 1.93404200  | -11.39109100 | H                                                                                 | -1.13521600 | 7.55610800  | -6.17516300  |
| H                                                                 | 0.71300000  | 2.59367800  | -11.38158800 | S                                                                                 | -0.51050200 | 4.16102500  | -7.35389200  |
| H                                                                 | -0.08814400 | 2.38872600  | -9.80298300  | O                                                                                 | 0.59118000  | 4.23179900  | -6.39655600  |
| H                                                                 | -0.39814300 | 3.84222100  | -10.77601900 | O                                                                                 | -1.50681800 | 3.09412800  | -7.25314300  |
| N                                                                 | -1.74606000 | 4.73326000  | -7.28489600  | C                                                                                 | 0.13495700  | 4.26224700  | -9.02592400  |
| C                                                                 | -2.14298900 | 3.37359100  | -6.87039000  | H                                                                                 | 0.80350800  | 5.12336900  | -9.07495100  |
| H                                                                 | -3.21849700 | 3.37853100  | -6.69063600  | H                                                                                 | -0.71276100 | 4.35786700  | -9.70320300  |
| H                                                                 | -1.62432000 | 3.12579200  | -5.94201000  | H                                                                                 | 0.68593900  | 3.33282100  | -9.19227100  |
| H                                                                 | -1.90033200 | 2.62545400  | -7.62664000  | C                                                                                 | -3.78753100 | 7.78169400  | -6.42897200  |
| S                                                                 | -0.05003300 | 4.97755800  | -7.65017300  | C                                                                                 | -4.39753000 | 8.00146300  | -5.18814400  |
| O                                                                 | 0.55372300  | 3.66238800  | -7.44954600  | C                                                                                 | -3.22294700 | 8.87712200  | -7.10704400  |
| O                                                                 | 0.01233400  | 5.64385000  | -8.95250700  | C                                                                                 | -4.42504900 | 9.28063900  | -4.62608100  |
| C                                                                 | 0.48886400  | 6.11572700  | -6.37049400  | H                                                                                 | -4.84543200 | 7.16785000  | -4.65426900  |
| H                                                                 | 0.38446100  | 5.61640000  | -5.40547700  | C                                                                                 | -3.24100900 | 10.15183500 | -6.54219400  |
| H                                                                 | -0.14051000 | 7.00414700  | -6.43854200  | H                                                                                 | -2.76389300 | 8.72345000  | -8.08118900  |
| H                                                                 | 1.53684000  | 6.34847400  | -6.57619700  | C                                                                                 | -3.84309100 | 10.35664000 | -5.29741400  |
| C                                                                 | -5.13528300 | 5.11268100  | -7.78323400  | H                                                                                 | -4.89849000 | 9.43229300  | -3.66046300  |
| C                                                                 | -6.27826200 | 4.57923800  | -8.41204400  | H                                                                                 | -2.78729600 | 10.98338900 | -7.07361000  |
| C                                                                 | -5.24459800 | 5.52738200  | -6.44015800  | H                                                                                 | -3.85993700 | 11.34886300 | -4.85664300  |
| C                                                                 | -7.48301200 | 4.46510300  | -7.72692900  |                                                                                   |             |             |              |
| H                                                                 | -6.20786100 | 4.25974100  | -9.44814900  | <b>TS<sub>Iy-Jy</sub></b> $E_{M06}(\text{trifluoromethylbenzene}) = -1830.616339$ |             |             |              |
| C                                                                 | -6.44660600 | 5.39168200  | -5.74775100  | C                                                                                 | -4.04847300 | 5.97268700  | -7.24543000  |
| H                                                                 | -4.38229800 | 5.94792900  | -5.93049800  | C                                                                                 | -2.72827600 | 5.64008900  | -7.85711800  |
| C                                                                 | -7.57006700 | 4.86517200  | -6.38882300  | C                                                                                 | -4.03503500 | 5.61454200  | -9.58730200  |
| H                                                                 | -8.35330700 | 4.05367200  | -8.22965200  | C                                                                                 | -4.92249500 | 5.83698000  | -8.46792000  |
| H                                                                 | -6.50605300 | 5.69904200  | -4.70780300  | C                                                                                 | -6.24314100 | 6.32760400  | -8.70586300  |
| H                                                                 | -8.50690900 | 4.76231700  | -5.84939200  | C                                                                                 | -6.71031300 | 6.31946200  | -9.99546700  |
|                                                                   |             |             |              | C                                                                                 | -5.86712300 | 5.93335100  | -11.08541000 |
| <b>Iy</b> $E_{M06}(\text{trifluoromethylbenzene}) = -1830.626625$ |             |             |              | C                                                                                 | -4.54148200 | 5.59175100  | -10.90812200 |
| C                                                                 | -3.79235100 | 6.44841100  | -7.12452800  | C                                                                                 | -5.09966700 | 3.84629000  | -8.60102500  |
| C                                                                 | -2.62676800 | 5.78652800  | -7.67867300  | H                                                                                 | -6.86332800 | 6.63988500  | -7.87193100  |
| C                                                                 | -4.05114500 | 5.51350000  | -9.29192200  | H                                                                                 | -7.72942200 | 6.62580500  | -10.20873900 |
| C                                                                 | -4.82349000 | 6.28042100  | -8.26539500  | H                                                                                 | -6.28443800 | 5.93495900  | -12.08807400 |
| C                                                                 | -5.60976500 | 7.41517800  | -8.85942500  | H                                                                                 | -3.88918600 | 5.35041000  | -11.74030200 |
| C                                                                 | -6.00159200 | 7.31779300  | -10.15177500 | H                                                                                 | -4.08497000 | 3.44848500  | -8.42028100  |
| C                                                                 | -5.54141700 | 6.23296800  | -11.00354700 | N                                                                                 | -2.75562400 | 5.39675500  | -9.17259500  |
| C                                                                 | -4.59063600 | 5.33703900  | -10.60222800 | O                                                                                 | -6.13173200 | 3.36235600  | -8.85348200  |
| C                                                                 | -6.01712500 | 5.41701500  | -7.68529600  | C                                                                                 | -4.64047300 | 2.73107500  | -4.54731600  |
| H                                                                 | -5.96587500 | 8.20018400  | -8.19980100  | C                                                                                 | -4.17828000 | 0.96252100  | -3.23217000  |
| H                                                                 | -6.66269900 | 8.06433800  | -10.58095300 | C                                                                                 | -5.48981200 | 1.27308800  | -3.05348100  |
| H                                                                 | -5.92429300 | 6.18540300  | -12.01908300 | H                                                                                 | -3.57064100 | 0.18447900  | -2.79699800  |
| H                                                                 | -4.15471800 | 4.61078900  | -11.27936700 | H                                                                                 | -6.24697000 | 0.82195700  | -2.43119600  |
| H                                                                 | -6.53829400 | 5.94565300  | -6.86476800  | C                                                                                 | -2.29168000 | 1.88460500  | -4.64084800  |
| N                                                                 | -2.84987700 | 5.16321300  | -8.89621900  | C                                                                                 | -7.05713500 | 3.01986200  | -3.94604100  |
| O                                                                 | -6.36280700 | 4.33781700  | -8.09680000  | N                                                                                 | -5.75553000 | 2.35923500  | -3.87006500  |
| C                                                                 | -4.28549200 | 2.97413300  | -4.61525500  | N                                                                                 | -3.67451300 | 1.86503400  | -4.15085300  |
| C                                                                 | -3.87669500 | 1.18400500  | -3.31639500  | Au                                                                                | -4.37952100 | 4.27921800  | -5.87389000  |
| C                                                                 | -5.19886200 | 1.16737100  | -3.63421000  | H                                                                                 | -7.06961200 | 3.67676700  | -4.81611500  |

|           |                                                         |             |              |                           |                                                         |             |              |
|-----------|---------------------------------------------------------|-------------|--------------|---------------------------|---------------------------------------------------------|-------------|--------------|
| H         | -7.23461600                                             | 3.60815200  | -3.04131900  | H                         | -2.52557100                                             | 6.16733000  | -5.66574500  |
| H         | -7.84124700                                             | 2.26667100  | -4.05312000  | H                         | -1.98632900                                             | 7.68710100  | -6.42482300  |
| H         | -1.75930800                                             | 1.03030800  | -4.22103400  | S                         | -0.69214700                                             | 6.24750700  | -8.83477400  |
| H         | -1.79416800                                             | 2.80598300  | -4.33147700  | O                         | -1.34597000                                             | 6.78544500  | -10.02712800 |
| H         | -2.28262100                                             | 1.82567300  | -5.72934800  | O                         | 0.31108700                                              | 7.01481500  | -8.10091600  |
| N         | -1.54448700                                             | 5.43204100  | -7.17791900  | C                         | -0.04812300                                             | 4.60925700  | -9.19955500  |
| C         | -1.35862500                                             | 5.94585200  | -5.81140200  | H                         | -0.88047800                                             | 3.99521700  | -9.54386300  |
| H         | -0.32765100                                             | 5.76829500  | -5.51072300  | H                         | 0.39865900                                              | 4.21077800  | -8.28704400  |
| H         | -2.03133000                                             | 5.46117400  | -5.09180200  | H                         | 0.70948500                                              | 4.73939400  | -9.97656500  |
| H         | -1.55969700                                             | 7.01637900  | -5.81904100  | C                         | -4.71985700                                             | 7.43713200  | -7.35939700  |
| S         | -0.78365100                                             | 3.87796000  | -7.51063100  | C                         | -5.68863700                                             | 7.86468000  | -6.44041200  |
| O         | 0.08703500                                              | 3.62329700  | -6.36326900  | C                         | -3.97928800                                             | 8.40097800  | -8.06611900  |
| O         | -1.84303800                                             | 2.91298800  | -7.84201300  | C                         | -5.90300300                                             | 9.22557700  | -6.21524400  |
| C         | 0.19571700                                              | 4.21548900  | -8.97510200  | H                         | -6.27819600                                             | 7.13266300  | -5.89364000  |
| H         | 0.93883500                                              | 4.97058400  | -8.71320500  | C                         | -4.19070300                                             | 9.75928200  | -7.83167000  |
| H         | -0.48825600                                             | 4.56859600  | -9.74740500  | H                         | -3.24264800                                             | 8.09041600  | -8.80241100  |
| H         | 0.67528300                                              | 3.27397500  | -9.25475900  | C                         | -5.14925700                                             | 10.17645200 | -6.90459200  |
| C         | -4.23301000                                             | 7.29469200  | -6.52121000  | H                         | -6.65560100                                             | 9.54052300  | -5.49812700  |
| C         | -5.21728800                                             | 7.48117300  | -5.53933300  | H                         | -3.60750300                                             | 10.49139200 | -8.38229600  |
| C         | -3.46346600                                             | 8.40327400  | -6.91333500  | H                         | -5.31012000                                             | 11.23514300 | -6.72469200  |
| C         | -5.41382800                                             | 8.73264700  | -4.95288600  |                           |                                                         |             |              |
| H         | -5.83185200                                             | 6.64127100  | -5.22614800  | <b>TS<sub>Jy-Ky</sub></b> | $E_{M06}(\text{trifluoromethylbenzene}) = -1830.618415$ |             |              |
| C         | -3.64962400                                             | 9.65093700  | -6.31722700  | C                         | -3.89062100                                             | 6.19328500  | -7.28017500  |
| H         | -2.71773000                                             | 8.29045400  | -7.69695000  | C                         | -2.64678900                                             | 5.61537900  | -7.91145500  |
| C         | -4.62560200                                             | 9.82009400  | -5.33312300  | C                         | -4.17547700                                             | 5.26239100  | -9.41311800  |
| H         | -6.17981900                                             | 8.85417000  | -4.19234300  | C                         | -4.83706500                                             | 6.03720900  | -8.36306200  |
| H         | -3.03711300                                             | 10.49171100 | -6.62997700  | C                         | -6.13623600                                             | 6.51981700  | -8.57964000  |
| H         | -4.77301400                                             | 10.79111400 | -4.87014600  | C                         | -6.71387900                                             | 6.32862000  | -9.83010300  |
|           |                                                         |             |              | C                         | -6.01126800                                             | 5.73698600  | -10.92471600 |
| <b>Jy</b> | $E_{M06}(\text{trifluoromethylbenzene}) = -1830.622927$ |             |              | C                         | -4.72760700                                             | 5.27283500  | -10.75814300 |
| C         | -4.49443600                                             | 5.99414200  | -7.70396900  | C                         | -5.05056600                                             | 3.68077800  | -9.13167100  |
| C         | -3.15018800                                             | 5.44953700  | -8.13299500  | H                         | -6.65228800                                             | 7.07714600  | -7.80420100  |
| C         | -4.58954400                                             | 4.24576600  | -9.28074900  | H                         | -7.72304400                                             | 6.69197400  | -10.00368700 |
| C         | -5.38977400                                             | 5.27238700  | -8.52871500  | H                         | -6.49172500                                             | 5.68559100  | -11.89611900 |
| C         | -6.75241700                                             | 5.50147400  | -8.88213900  | H                         | -4.15291100                                             | 4.82129400  | -11.56049600 |
| C         | -7.19481400                                             | 5.00706200  | -10.08108200 | H                         | -6.13935000                                             | 3.86316400  | -9.11732300  |
| C         | -6.32682900                                             | 4.30753200  | -11.01455500 | N                         | -2.82225600                                             | 5.09707400  | -9.10704400  |
| C         | -5.04360500                                             | 4.02759100  | -10.69142900 | O                         | -4.43436900                                             | 2.69326800  | -8.99588900  |
| C         | -5.03260300                                             | 2.82402900  | -8.64201700  | C                         | -4.59391700                                             | 2.85576100  | -4.69859600  |
| H         | -7.36885400                                             | 6.16173500  | -8.28203400  | C                         | -4.15543900                                             | 1.15116200  | -3.29570600  |
| H         | -8.21178000                                             | 5.22327300  | -10.39687300 | C                         | -5.50192200                                             | 1.19535300  | -3.47396300  |
| H         | -6.71576600                                             | 4.06408700  | -11.99814500 | H                         | -3.54232500                                             | 0.49184900  | -2.70136600  |
| H         | -4.35902300                                             | 3.51401000  | -11.35879500 | H                         | -6.29204900                                             | 0.58461100  | -3.06572700  |
| H         | -6.10443000                                             | 2.60370400  | -8.80526000  | C                         | -2.17950100                                             | 2.45260500  | -4.16957900  |
| N         | -3.20640700                                             | 4.49108100  | -9.00833200  | C                         | -7.08849400                                             | 2.61249400  | -4.80348600  |
| O         | -4.27679100                                             | 2.10517400  | -8.05644300  | N                         | -5.75349700                                             | 2.25070900  | -4.33433400  |
| C         | -5.14416400                                             | 3.52461600  | -4.25060000  | N                         | -3.61585300                                             | 2.17772300  | -4.04905000  |
| C         | -4.79341700                                             | 1.95911600  | -2.67585500  | Au                        | -4.32041500                                             | 4.43363100  | -5.96868200  |
| C         | -5.73252400                                             | 2.81909700  | -2.19740000  | H                         | -7.04678900                                             | 3.60317100  | -5.25709900  |
| H         | -4.35719700                                             | 1.07454300  | -2.23871800  | H                         | -7.77855100                                             | 2.63322900  | -3.95665200  |
| H         | -6.27054700                                             | 2.83110100  | -1.26236800  | H                         | -7.43803100                                             | 1.88524900  | -5.54208900  |
| C         | -3.43570300                                             | 1.78092300  | -4.79831400  | H                         | -1.65357100                                             | 1.90742600  | -3.38474700  |
| C         | -6.83683600                                             | 4.91861500  | -3.04434100  | H                         | -1.99981700                                             | 3.52173600  | -4.04396600  |
| N         | -5.93708900                                             | 3.77222100  | -3.17899000  | H                         | -1.82446300                                             | 2.14342100  | -5.15232300  |
| N         | -4.44490900                                             | 2.40672700  | -3.93678000  | N                         | -1.42323000                                             | 5.48751800  | -7.27280700  |
| Au        | -4.95921300                                             | 4.62289100  | -5.95307500  | C                         | -1.13448900                                             | 6.25507600  | -6.04990900  |
| H         | -7.27839900                                             | 5.14506400  | -4.01580300  | H                         | -0.11720800                                             | 6.03185400  | -5.73416400  |
| H         | -6.28663900                                             | 5.78995700  | -2.67914900  | H                         | -1.82807600                                             | 6.00581900  | -5.23748600  |
| H         | -7.63128100                                             | 4.66542200  | -2.34027300  | H                         | -1.21881400                                             | 7.31775100  | -6.27603400  |
| H         | -3.19992200                                             | 0.79410500  | -4.39775700  | S                         | -0.69189700                                             | 3.89566000  | -7.37137800  |
| H         | -2.53121600                                             | 2.39393700  | -4.81445900  | O                         | 0.31419300                                              | 3.87051900  | -6.30796000  |
| H         | -3.82470400                                             | 1.67951400  | -5.81170000  | O                         | -1.75874600                                             | 2.88889600  | -7.38217100  |
| N         | -1.94273300                                             | 5.93334600  | -7.65910600  | C                         | 0.11288500                                              | 3.93030100  | -8.97513500  |
| C         | -1.80783800                                             | 6.61177300  | -6.35883200  | H                         | 0.87091500                                              | 4.71502300  | -8.95412500  |
| H         | -0.79943100                                             | 6.44009900  | -5.98165200  | H                         | -0.65772900                                             | 4.12707700  | -9.72061900  |

|           |                                                         |             |              |            |                                                         |             |              |
|-----------|---------------------------------------------------------|-------------|--------------|------------|---------------------------------------------------------|-------------|--------------|
| H         | 0.57062000                                              | 2.94767600  | -9.11427400  | C          | -4.34353300                                             | 9.93400700  | -4.93956900  |
| C         | -3.91838200                                             | 7.52744400  | -6.56443700  | H          | -5.59499900                                             | 8.89022500  | -3.52823500  |
| C         | -4.51288400                                             | 7.73269200  | -5.31338700  | H          | -3.07265300                                             | 10.69156800 | -6.51179000  |
| C         | -3.36292200                                             | 8.63171000  | -7.23465300  | H          | -4.42802100                                             | 10.89083100 | -4.43308800  |
| C         | -4.53861800                                             | 9.00606700  | -4.73860400  |            |                                                         |             |              |
| H         | -4.95135400                                             | 6.89445200  | -4.77945800  | <b>Ky1</b> | $E_{M06(\text{trifluoromethylbenzene})} = -3657.883485$ |             |              |
| C         | -3.37755200                                             | 9.90031900  | -6.65679200  | C          | -3.89901500                                             | 5.76472100  | -7.19383600  |
| H         | -2.90812500                                             | 8.48777500  | -8.21226800  | C          | -3.01823400                                             | 4.79765200  | -7.87946100  |
| C         | -3.96689200                                             | 10.09103300 | -5.40415900  | C          | -4.85269900                                             | 4.61148600  | -8.99436300  |
| H         | -5.00087800                                             | 9.14552500  | -3.76562000  | C          | -5.10628200                                             | 5.67627800  | -8.05990900  |
| H         | -2.93410300                                             | 10.73883600 | -7.18601000  | C          | -6.27092700                                             | 6.38430400  | -8.12044100  |
| H         | -3.98081300                                             | 11.07825900 | -4.95202600  | C          | -7.26535300                                             | 6.06524800  | -9.11948700  |
|           |                                                         |             |              | C          | -7.07814000                                             | 5.06685400  | -10.01666800 |
| <b>Ky</b> | $E_{M06(\text{trifluoromethylbenzene})} = -1830.643525$ |             |              | C          | -5.82611800                                             | 4.24703800  | -10.04324000 |
| C         | -4.01511000                                             | 6.16461700  | -7.01915300  | C          | -6.17445100                                             | 2.74976100  | -10.12745900 |
| C         | -2.77722000                                             | 5.59602900  | -7.55196600  | H          | -6.45069200                                             | 7.20204800  | -7.42713800  |
| C         | -4.17698200                                             | 5.25114100  | -9.16187000  | H          | -8.17480400                                             | 6.65808400  | -9.14799100  |
| C         | -4.92702600                                             | 5.97633800  | -8.16800600  | H          | -7.82904500                                             | 4.84800100  | -10.77072000 |
| C         | -6.20444300                                             | 6.38981400  | -8.43419200  | H          | -5.30592000                                             | 4.45157300  | -11.00079500 |
| C         | -6.82643900                                             | 6.06769900  | -9.69749500  | H          | -6.63956800                                             | 2.46661900  | -11.09001800 |
| C         | -6.18237600                                             | 5.32796800  | -10.63736600 | N          | -3.66023400                                             | 4.07153600  | -8.85618000  |
| C         | -4.84391000                                             | 4.71513100  | -10.37151100 | O          | -5.98549200                                             | 1.94955700  | -9.24360200  |
| C         | -5.17080100                                             | 3.19830600  | -10.04154800 | C          | -4.84836100                                             | 2.67446100  | -4.44755600  |
| H         | -6.74869400                                             | 6.98483200  | -7.70498100  | C          | -5.32546100                                             | 1.27631300  | -2.74388700  |
| H         | -7.82101400                                             | 6.45478400  | -9.89613400  | C          | -5.22365800                                             | 0.53063800  | -3.87640900  |
| H         | -6.65749900                                             | 5.08728500  | -11.58322800 | H          | -5.54102100                                             | 0.99517800  | -1.72491200  |
| H         | -4.19049200                                             | 4.68505700  | -11.24667800 | H          | -5.32882700                                             | -0.53116700 | -4.03517100  |
| H         | -5.73801900                                             | 3.06175200  | -9.10030700  | C          | -5.11453600                                             | 3.71893300  | -2.19044900  |
| N         | -2.92852000                                             | 5.02485600  | -8.80241600  | C          | -4.70522000                                             | 1.00953600  | -6.30941900  |
| O         | -4.84680100                                             | 2.29727300  | -10.75985500 | N          | -4.93360500                                             | 1.40198500  | -4.90931500  |
| C         | -4.81595800                                             | 2.59983500  | -4.76957400  | N          | -5.09132500                                             | 2.59068000  | -3.11457500  |
| C         | -4.52300300                                             | 0.75396100  | -3.51527700  | Au         | -4.39271900                                             | 4.26659300  | -5.64120700  |
| C         | -5.85771200                                             | 0.89273400  | -3.73095600  | H          | -5.35360800                                             | 1.58051300  | -6.97512300  |
| H         | -3.96950100                                             | 0.00791200  | -2.96675000  | H          | -4.93284600                                             | -0.05308800 | -6.40850900  |
| H         | -6.69443600                                             | 0.29224700  | -3.40951500  | H          | -3.66666300                                             | 1.19654200  | -6.58661600  |
| C         | -2.45182300                                             | 2.03960400  | -4.17860000  | H          | -6.11917800                                             | 3.84508100  | -1.77644200  |
| C         | -7.31816100                                             | 2.51368200  | -4.96663500  | H          | -4.83130100                                             | 4.62035700  | -2.73430700  |
| N         | -6.01948500                                             | 2.03252500  | -4.50032100  | H          | -4.40277400                                             | 3.54797900  | -1.37801700  |
| N         | -3.90063300                                             | 1.80844500  | -4.15784500  | N          | -1.71792100                                             | 4.55055700  | -7.62987300  |
| Au        | -4.41419400                                             | 4.27943900  | -5.85464100  | C          | -0.97899800                                             | 5.30895600  | -6.61638600  |
| H         | -7.18647600                                             | 3.49002700  | -5.43338400  | H          | -0.00033100                                             | 4.85066400  | -6.48839000  |
| H         | -7.99991300                                             | 2.60821800  | -4.11777300  | H          | -1.52736100                                             | 5.28741500  | -5.66680400  |
| H         | -7.73606700                                             | 1.81387600  | -5.69574500  | H          | -0.86335100                                             | 6.34214500  | -6.94572100  |
| H         | -1.96429800                                             | 1.24012300  | -3.61932800  | S          | -0.99932400                                             | 3.02047400  | -8.20034800  |
| H         | -2.22634000                                             | 2.99844500  | -3.70589900  | O          | 0.37956700                                              | 3.07988200  | -7.71292000  |
| H         | -2.09224200                                             | 2.04630800  | -5.20812200  | O          | -1.87749200                                             | 1.93350700  | -7.76606400  |
| N         | -1.54954000                                             | 5.54250700  | -6.96336600  | C          | -1.00155200                                             | 3.17793700  | -9.98544400  |
| C         | -1.32275000                                             | 6.18251700  | -5.65745200  | H          | -0.48196200                                             | 4.10199000  | -10.23684000 |
| H         | -0.29918700                                             | 5.98321000  | -5.34671200  | H          | -2.03231900                                             | 3.20994500  | -10.32987300 |
| H         | -2.01809400                                             | 5.79075100  | -4.90349300  | H          | -0.46905400                                             | 2.29784900  | -10.35389500 |
| H         | -1.47449400                                             | 7.25612500  | -5.75986000  | C          | -3.46930200                                             | 7.14903700  | -6.78095500  |
| S         | -0.61791600                                             | 4.03910300  | -7.24277300  | C          | -3.75444300                                             | 7.67509100  | -5.51498500  |
| O         | 0.44007500                                              | 4.07255300  | -6.23603800  | C          | -2.83566900                                             | 7.97307900  | -7.72794400  |
| O         | -1.57136300                                             | 2.92777300  | -7.27568400  | C          | -3.40531100                                             | 8.98883900  | -5.19123800  |
| C         | 0.09114500                                              | 4.30257000  | -8.87045800  | H          | -4.25116500                                             | 7.04921300  | -4.77769600  |
| H         | 0.72443800                                              | 5.18978900  | -8.81939900  | C          | -2.47912100                                             | 9.28075700  | -7.40081500  |
| H         | -0.73039500                                             | 4.41979000  | -9.57582100  | H          | -2.61422100                                             | 7.58009500  | -8.71494600  |
| H         | 0.68733100                                              | 3.41182900  | -9.08548300  | C          | -2.76253800                                             | 9.79424500  | -6.13206100  |
| C         | -4.11361500                                             | 7.45042800  | -6.24140300  | H          | -3.63322700                                             | 9.37874500  | -4.20258200  |
| C         | -4.88316800                                             | 7.57747900  | -5.07818300  | H          | -1.98346600                                             | 9.89911100  | -8.14424800  |
| C         | -3.47541800                                             | 8.59279400  | -6.75474200  | H          | -2.48591800                                             | 10.81449600 | -5.88032100  |
| C         | -4.99783800                                             | 8.81107600  | -4.43204400  | N          | -3.36565300                                             | 4.86608900  | -11.84476200 |
| H         | -5.38891500                                             | 6.70700900  | -4.66922200  | S          | -3.75408000                                             | 4.17233800  | -13.26010900 |
| C         | -3.58094500                                             | 9.82194200  | -6.10543100  | S          | -2.42468900                                             | 6.17223400  | -11.68502700 |
| H         | -2.89123900                                             | 8.51209500  | -7.66889700  | C          | -2.43442300                                             | 2.85209900  | -13.37064100 |



|           |                                                         |             |              |                            |                                                         |             |              |
|-----------|---------------------------------------------------------|-------------|--------------|----------------------------|---------------------------------------------------------|-------------|--------------|
| C         | -5.74919100                                             | 5.98179500  | 8.79652800   | H                          | -7.77144500                                             | 2.83541600  | -9.51139900  |
| C         | -6.11513700                                             | 3.69963800  | 9.53285200   | H                          | -8.72705600                                             | 4.71294300  | -8.18944000  |
| C         | -7.11643600                                             | 6.16351500  | 8.67476400   |                            |                                                         |             |              |
| H         | -5.07282000                                             | 6.81219800  | 8.62544500   | <b>TS<sub>Ly-Ly1</sub></b> | $E_{M06}(\text{trifluoromethylbenzene}) = -1830.601306$ |             |              |
| C         | -7.48568500                                             | 3.86783400  | 9.36094100   | C                          | -2.92827200                                             | 6.17212500  | -6.51892200  |
| H         | -5.72549700                                             | 2.74082300  | 9.85970900   | C                          | -1.82259700                                             | 6.30334700  | -7.46193100  |
| C         | -7.98880100                                             | 5.09822700  | 8.93656700   | C                          | -2.88429000                                             | 7.53422600  | -9.23598700  |
| H         | -7.51162200                                             | 7.12828900  | 8.37161700   | C                          | -4.21492500                                             | 6.96758100  | -9.12560100  |
| H         | -8.16189300                                             | 3.04474000  | 9.56972400   | C                          | -5.09966600                                             | 7.01416000  | -10.23990500 |
| H         | -9.05999100                                             | 5.23569400  | 8.82181400   | C                          | -4.76685500                                             | 7.76668500  | -11.33767100 |
|           |                                                         |             |              | C                          | -3.52567800                                             | 8.46946500  | -11.38388100 |
| <b>Ly</b> | $E_{M06}(\text{trifluoromethylbenzene}) = -1830.618517$ |             |              | C                          | -2.60966500                                             | 8.35998800  | -10.36861700 |
| C         | -3.44126900                                             | 4.64803700  | -9.37757200  | C                          | -4.58143600                                             | 6.44074500  | -7.87120300  |
| C         | -2.57027200                                             | 4.53728400  | -8.10266000  | H                          | -6.06740200                                             | 6.52577400  | -10.16603700 |
| C         | -0.48135100                                             | 4.97566800  | -9.16549600  | H                          | -5.46253100                                             | 7.85901100  | -12.16583000 |
| C         | -0.79490200                                             | 6.00107600  | -10.11934400 | H                          | -3.29408000                                             | 9.07365300  | -12.25589100 |
| C         | 0.21725100                                              | 6.50246400  | -10.99011300 | H                          | -1.63668100                                             | 8.83649300  | -10.42814100 |
| C         | 1.46686100                                              | 5.92734600  | -11.00833000 | H                          | -5.59878500                                             | 6.11566800  | -7.65181300  |
| C         | 1.75974600                                              | 4.87610500  | -10.10602600 | N                          | -1.84431400                                             | 7.16303300  | -8.47125800  |
| C         | 0.82208400                                              | 4.42712000  | -9.19419300  | O                          | -3.96035400                                             | 7.06999300  | -6.77941900  |
| C         | -2.07609800                                             | 6.57905700  | -10.20635100 | C                          | -3.59639300                                             | 2.20122900  | -8.12702800  |
| H         | -0.02404800                                             | 7.32305100  | -11.66083500 | C                          | -3.32872500                                             | 0.18512200  | -9.08986800  |
| H         | 2.23066300                                              | 6.29043400  | -11.68782900 | C                          | -3.56224100                                             | -0.02256600 | -7.76642400  |
| H         | 2.75571100                                              | 4.44205800  | -10.10175400 | H                          | -3.14018800                                             | -0.51098100 | -9.89217000  |
| H         | 1.06956200                                              | 3.67724300  | -8.45028000  | H                          | -3.61768400                                             | -0.93387600 | -7.19167900  |
| H         | -2.19969700                                             | 7.55771700  | -10.67235300 | C                          | -3.16727300                                             | 2.20298900  | -10.59287300 |
| N         | -1.28329200                                             | 4.60386000  | -8.12871700  | C                          | -4.02654400                                             | 1.44872100  | -5.77762000  |
| O         | -3.19202600                                             | 6.08801400  | -9.81779500  | N                          | -3.72123400                                             | 1.22555700  | -7.19066800  |
| C         | -2.19309400                                             | 1.97155900  | -12.35064400 | N                          | -3.35032000                                             | 1.55289100  | -9.29121700  |
| C         | -0.89256900                                             | 0.75762400  | -13.74086500 | Au                         | -3.72278200                                             | 4.23327100  | -7.81466500  |
| C         | -2.18387800                                             | 0.40670700  | -13.97809300 | H                          | -3.51320200                                             | 2.34627600  | -5.42879800  |
| H         | 0.02669300                                              | 0.41905500  | -14.19278400 | H                          | -3.67796900                                             | 0.59035600  | -5.20066200  |
| H         | -2.60963000                                             | -0.30061600 | -14.67264900 | H                          | -5.10454100                                             | 1.56817800  | -5.63727800  |
| C         | 0.25672900                                              | 2.38187800  | -12.18316200 | H                          | -2.65098000                                             | 1.50885600  | -11.25799300 |
| C         | -4.42068200                                             | 1.05307200  | -13.03354000 | H                          | -2.56066200                                             | 3.09979100  | -10.46682900 |
| N         | -2.96522800                                             | 1.16369000  | -13.12111300 | H                          | -4.14044100                                             | 2.46016700  | -11.01974600 |
| N         | -0.91918100                                             | 1.71648600  | -12.74308800 | N                          | -0.67762600                                             | 5.49480900  | -7.41166900  |
| Au        | -2.78649100                                             | 3.29358000  | -10.88561800 | C                          | -0.39626100                                             | 4.56923800  | -6.30227600  |
| H         | -4.69847200                                             | 0.20138400  | -12.40600000 | H                          | -0.17159200                                             | 5.13582700  | -5.40120800  |
| H         | -4.83185300                                             | 0.91756900  | -14.03622300 | H                          | 0.46908100                                              | 3.96729000  | -6.57122300  |
| H         | -4.82176100                                             | 1.97096200  | -12.60280000 | H                          | -1.24332200                                             | 3.90047500  | -6.11056100  |
| H         | 1.14824300                                              | 2.00944600  | -12.69019000 | S                          | -0.13183200                                             | 4.92338400  | -8.99395000  |
| H         | 0.33039300                                              | 2.17196300  | -11.11463200 | O                          | 0.67586100                                              | 3.73225800  | -8.73324700  |
| H         | 0.17904000                                              | 3.46124600  | -12.32864900 | O                          | -1.29549400                                             | 4.82872500  | -9.88656600  |
| N         | -3.20169400                                             | 4.41666400  | -6.87832100  | C                          | 0.94686300                                              | 6.24916100  | -9.54579100  |
| C         | -4.10097000                                             | 3.28000300  | -6.58605900  | H                          | 1.77080900                                              | 6.32395400  | -8.83418800  |
| H         | -5.10321800                                             | 3.62791000  | -6.32615500  | H                          | 0.35970300                                              | 7.16541600  | -9.58212100  |
| H         | -3.66756000                                             | 2.69139500  | -5.77075600  | H                          | 1.31294700                                              | 5.95941500  | -10.53395900 |
| H         | -4.16958200                                             | 2.63956400  | -7.46384600  | C                          | -2.81793400                                             | 5.90349900  | -5.05845300  |
| S         | -2.40462000                                             | 5.14440300  | -5.49236000  | C                          | -3.77473500                                             | 5.12022000  | -4.39671200  |
| O         | -1.66214700                                             | 4.12320600  | -4.75844400  | C                          | -1.84209800                                             | 6.57752100  | -4.30845800  |
| O         | -1.78397900                                             | 6.37217900  | -5.98024200  | C                          | -3.72324900                                             | 4.96856600  | -3.01262600  |
| C         | -3.86969100                                             | 5.59380900  | -4.54130100  | H                          | -4.55917200                                             | 4.63573900  | -4.97144400  |
| H         | -4.37495100                                             | 4.69562100  | -4.18447500  | C                          | -1.79830300                                             | 6.43002700  | -2.92155400  |
| H         | -4.52357100                                             | 6.20039300  | -5.16990900  | H                          | -1.13214800                                             | 7.22999000  | -4.80944500  |
| H         | -3.50053100                                             | 6.17633400  | -3.69362300  | C                          | -2.72994700                                             | 5.61727300  | -2.27297700  |
| C         | -4.93103300                                             | 4.68096500  | -9.09435100  | H                          | -4.46272100                                             | 4.35270400  | -2.50921000  |
| C         | -5.48536300                                             | 5.73739000  | -8.34941800  | H                          | -1.04088100                                             | 6.95744900  | -2.34954600  |
| C         | -5.77711100                                             | 3.64659900  | -9.51289500  | H                          | -2.69164400                                             | 5.50046600  | -1.19414400  |
| C         | -6.84098400                                             | 5.75285500  | -8.03098100  |                            |                                                         |             |              |
| H         | -4.84549800                                             | 6.55021700  | -8.01979900  | <b>Ly1</b>                 | $E_{M06}(\text{trifluoromethylbenzene}) = -1830.631268$ |             |              |
| C         | -7.13453700                                             | 3.65145100  | -9.18253600  | C                          | -2.27758600                                             | -0.29019500 | -0.45971400  |
| H         | -5.37089300                                             | 2.81884300  | -10.08754100 | C                          | -1.60307100                                             | -0.25535300 | 0.86997300   |
| C         | -7.67069900                                             | 4.70396300  | -8.44147600  | C                          | -1.43699600                                             | 2.12620000  | 1.06440000   |
| H         | -7.25238800                                             | 6.58198300  | -7.46216200  | C                          | -1.07454700                                             | 2.46802800  | -0.26663500  |



|                                                                                    |             |             |              |                                                                     |             |             |              |
|------------------------------------------------------------------------------------|-------------|-------------|--------------|---------------------------------------------------------------------|-------------|-------------|--------------|
| C                                                                                  | -1.02818700 | 3.82033600  | -0.62176700  | H                                                                   | -1.62920100 | 7.46677200  | -11.31680300 |
| C                                                                                  | -1.32354500 | 4.81717200  | 0.30701700   | H                                                                   | -5.16191300 | 6.69090900  | -7.06908300  |
| C                                                                                  | -1.68149500 | 4.47678600  | 1.61870100   | N                                                                   | -1.61210800 | 6.82459300  | -8.82212900  |
| C                                                                                  | -1.72298100 | 3.14262700  | 1.99783500   | O                                                                   | -3.40209900 | 7.76012300  | -6.74915800  |
| C                                                                                  | -0.69093500 | 1.40170800  | -1.23523400  | C                                                                   | -3.99045000 | 2.50610500  | -8.21322500  |
| H                                                                                  | -0.75032800 | 4.09097500  | -1.63706300  | C                                                                   | -3.85742200 | 0.61924500  | -9.41650600  |
| H                                                                                  | -1.27495200 | 5.86064200  | 0.01048100   | C                                                                   | -4.20151200 | 0.27359300  | -8.14664400  |
| H                                                                                  | -1.91601200 | 5.25379700  | 2.33951500   | H                                                                   | -3.68418600 | 0.01289300  | -10.29163500 |
| H                                                                                  | -1.98166800 | 2.85165100  | 3.01090200   | H                                                                   | -4.39768400 | -0.69006800 | -7.70336600  |
| H                                                                                  | -0.64910900 | 1.82270900  | -2.24091300  | C                                                                   | -3.31161100 | 2.79247600  | -10.59732200 |
| N                                                                                  | -1.40901500 | 0.82759200  | 1.54221900   | C                                                                   | -4.65194700 | 1.52911500  | -6.00505200  |
| O                                                                                  | -1.91369000 | 0.51808200  | -1.37962500  | N                                                                   | -4.27551200 | 1.44834800  | -7.41777500  |
| C                                                                                  | 2.88689000  | -0.67574600 | -0.72185900  | N                                                                   | -3.73528500 | 1.99642500  | -9.43961400  |
| C                                                                                  | 5.01970300  | -1.22590900 | -0.21349600  | Au                                                                  | -3.86115600 | 4.43494800  | -7.70462900  |
| C                                                                                  | 4.52341200  | -2.20706800 | -1.01182200  | H                                                                   | -4.12017200 | 2.35869900  | -5.53548200  |
| H                                                                                  | 5.98909600  | -1.10821100 | 0.24560700   | H                                                                   | -4.37009800 | 0.59669700  | -5.51275600  |
| H                                                                                  | 4.97774700  | -3.11075900 | -1.38775200  | H                                                                   | -5.73016400 | 1.68281000  | -5.90937000  |
| C                                                                                  | 4.15156200  | 0.93736000  | 0.72085700   | H                                                                   | -3.27426800 | 2.14066500  | -11.47111000 |
| C                                                                                  | 2.33945500  | -2.62078400 | -2.19967500  | H                                                                   | -2.32735100 | 3.21898800  | -10.39850600 |
| N                                                                                  | 3.21655000  | -1.85737200 | -1.30779600  | H                                                                   | -4.03367300 | 3.59313100  | -10.77205900 |
| N                                                                                  | 4.00303800  | -0.30040600 | -0.04373200  | N                                                                   | -0.43720000 | 5.79038200  | -7.10892600  |
| Au                                                                                 | 1.08234600  | 0.32491600  | -0.90137200  | C                                                                   | 0.36562700  | 6.38281200  | -6.02503800  |
| H                                                                                  | 2.41877800  | -2.23884000 | -3.22095800  | H                                                                   | -0.30784600 | 6.89562800  | -5.33545400  |
| H                                                                                  | 1.30743500  | -2.53675400 | -1.85697000  | H                                                                   | 1.08647800  | 7.10798400  | -6.42070100  |
| H                                                                                  | 2.64490300  | -3.66921500 | -2.18127800  | H                                                                   | 0.88490300  | 5.59179300  | -5.48439700  |
| H                                                                                  | 4.61565500  | 0.71699800  | 1.68540100   | S                                                                   | 0.26597400  | 4.56502000  | -8.07095200  |
| H                                                                                  | 3.16556800  | 1.37357300  | 0.88228800   | O                                                                   | 1.10600200  | 3.79396800  | -7.15764300  |
| H                                                                                  | 4.77483900  | 1.64631000  | 0.16883000   | O                                                                   | -0.84202000 | 3.92453500  | -8.78996300  |
| N                                                                                  | -1.48375500 | -1.48358000 | 1.53984800   | C                                                                   | 1.30974700  | 5.42352900  | -9.25783000  |
| C                                                                                  | -1.42073000 | -1.49285000 | 3.00868800   | H                                                                   | 2.08625200  | 5.95912600  | -8.70734700  |
| H                                                                                  | -0.48521200 | -1.06376400 | 3.38196400   | H                                                                   | 0.67180900  | 6.10799200  | -9.81759800  |
| H                                                                                  | -1.53735500 | -2.52363700 | 3.34832800   | H                                                                   | 1.75909600  | 4.66471100  | -9.90309000  |
| H                                                                                  | -2.24922000 | -0.89433000 | 3.39180100   | C                                                                   | -2.79674000 | 5.91356500  | -5.26675600  |
| S                                                                                  | -0.77978000 | -2.82048300 | 0.72995900   | C                                                                   | -2.19487300 | 4.67556300  | -4.96018500  |
| O                                                                                  | -1.46725800 | -4.01795500 | 1.19464800   | C                                                                   | -3.49572200 | 6.59930800  | -4.26225700  |
| O                                                                                  | -0.74485700 | -2.45332500 | -0.69290500  | C                                                                   | -2.29998300 | 4.14611000  | -3.67636500  |
| C                                                                                  | 0.91297000  | -2.85800100 | 1.35187100   | H                                                                   | -1.63079900 | 4.13838600  | -5.71292500  |
| H                                                                                  | 0.89446100  | -3.06830700 | 2.42228100   | C                                                                   | -3.59713900 | 6.06017900  | -2.97858400  |
| H                                                                                  | 1.38966600  | -1.90170100 | 1.13300700   | H                                                                   | -3.95337800 | 7.55578400  | -4.48732500  |
| H                                                                                  | 1.41681800  | -3.67011800 | 0.82206100   | C                                                                   | -3.00366300 | 4.83299200  | -2.68168500  |
| C                                                                                  | -3.47085300 | -1.07416600 | -0.72335900  | H                                                                   | -1.81924500 | 3.19859500  | -3.45065300  |
| C                                                                                  | -3.89749100 | -1.22475900 | -2.06290600  | H                                                                   | -4.13747600 | 6.60587800  | -2.21094300  |
| C                                                                                  | -4.22913200 | -1.65591300 | 0.31670500   | H                                                                   | -3.07963600 | 4.41723700  | -1.68136000  |
| C                                                                                  | -5.04262900 | -1.95300600 | -2.35019900  |                                                                     |             |             |              |
| H                                                                                  | -3.31016100 | -0.78587400 | -2.86110500  | <b>PQ'y</b> $E_{M06}(\text{trifluoromethylbenzene}) = -1390.298196$ |             |             |              |
| C                                                                                  | -5.38389100 | -2.36798300 | 0.01819400   | C                                                                   | -1.91843000 | 7.04959400  | 7.62375600   |
| H                                                                                  | -3.92413100 | -1.54095100 | 1.34862700   | C                                                                   | -2.75662000 | 6.10222400  | 6.79902200   |
| C                                                                                  | -5.78819700 | -2.52450900 | -1.31144300  | C                                                                   | -0.33167900 | 5.41664000  | 8.16594000   |
| H                                                                                  | -5.35671100 | -2.08147900 | -3.38112600  | C                                                                   | -0.94842500 | 4.39392600  | 7.41332100   |
| H                                                                                  | -5.96807500 | -2.80589600 | 0.82101700   | C                                                                   | -0.43721400 | 3.09508600  | 7.45466900   |
| H                                                                                  | -6.68425400 | -3.09410000 | -1.53973200  | C                                                                   | 0.70176100  | 2.80913300  | 8.20822300   |
|                                                                                    |             |             |              | C                                                                   | 1.33062500  | 3.82718800  | 8.93412800   |
|                                                                                    |             |             |              | C                                                                   | 0.81602100  | 5.12111100  | 8.91661600   |
|                                                                                    |             |             |              | C                                                                   | -2.16069500 | 4.73658000  | 6.65042900   |
|                                                                                    |             |             |              | H                                                                   | -0.92887900 | 2.31032500  | 6.88454800   |
|                                                                                    |             |             |              | H                                                                   | 1.10121000  | 1.79921700  | 8.22544600   |
|                                                                                    |             |             |              | H                                                                   | 2.21936800  | 3.60739600  | 9.51904500   |
|                                                                                    |             |             |              | H                                                                   | 1.27938500  | 5.92320800  | 9.48267700   |
|                                                                                    |             |             |              | H                                                                   | -2.85212900 | 3.92651100  | 6.41986400   |
|                                                                                    |             |             |              | N                                                                   | -0.81809100 | 6.72578000  | 8.20871000   |
|                                                                                    |             |             |              | O                                                                   | -2.07220800 | 5.71365300  | 5.59149400   |
|                                                                                    |             |             |              | N                                                                   | -2.36285300 | 8.38628400  | 7.75394100   |
|                                                                                    |             |             |              | C                                                                   | -1.77476800 | 9.16377200  | 8.86103400   |
|                                                                                    |             |             |              | H                                                                   | -0.70556600 | 9.36031100  | 8.72165600   |
|                                                                                    |             |             |              | H                                                                   | -2.32132000 | 10.10121300 | 8.94632000   |
| <b>TS<sub>Ly1-Ay</sub></b> $E_{M06}(\text{trifluoromethylbenzene}) = -1830.624471$ |             |             |              |                                                                     |             |             |              |
| C                                                                                  | -2.75174500 | 6.52300400  | -6.64308800  |                                                                     |             |             |              |
| C                                                                                  | -1.58856800 | 6.43200400  | -7.59123600  |                                                                     |             |             |              |
| C                                                                                  | -2.76370300 | 7.13545900  | -9.52640000  |                                                                     |             |             |              |
| C                                                                                  | -4.07081000 | 7.05662600  | -8.97260900  |                                                                     |             |             |              |
| C                                                                                  | -5.20009100 | 7.15528400  | -9.80139000  |                                                                     |             |             |              |
| C                                                                                  | -5.04137900 | 7.40521000  | -11.15862400 |                                                                     |             |             |              |
| C                                                                                  | -3.75350800 | 7.54309600  | -11.70489300 |                                                                     |             |             |              |
| C                                                                                  | -2.63013700 | 7.40010200  | -10.90302500 |                                                                     |             |             |              |
| C                                                                                  | -4.18970200 | 6.88862800  | -7.52614000  |                                                                     |             |             |              |
| H                                                                                  | -6.19271500 | 7.07345200  | -9.36670500  |                                                                     |             |             |              |
| H                                                                                  | -5.91518300 | 7.51305300  | -11.79368400 |                                                                     |             |             |              |
| H                                                                                  | -3.63726300 | 7.74981500  | -12.76440800 |                                                                     |             |             |              |

|                            |                                                         |             |             |           |                                                         |             |             |
|----------------------------|---------------------------------------------------------|-------------|-------------|-----------|---------------------------------------------------------|-------------|-------------|
| H                          | -1.89623400                                             | 8.57463100  | 9.77159200  | C         | -3.12819700                                             | 6.57874200  | 8.79507900  |
| S                          | -2.47587300                                             | 9.27348300  | 6.25655000  | C         | -2.41692000                                             | 7.59166600  | 9.45268800  |
| O                          | -2.59459300                                             | 10.68029700 | 6.63737000  | C         | -4.52242100                                             | 6.51769900  | 8.95304600  |
| O                          | -3.47025100                                             | 8.63353300  | 5.40421200  | C         | -3.08313600                                             | 8.52284400  | 10.25130300 |
| C                          | -0.85342800                                             | 8.99401600  | 5.50867900  | H         | -1.34048600                                             | 7.64775000  | 9.33046400  |
| H                          | -0.07633500                                             | 9.30569600  | 6.20968800  | C         | -5.18819200                                             | 7.45828700  | 9.73942100  |
| H                          | -0.76873700                                             | 7.93142400  | 5.26994800  | H         | -5.08676000                                             | 5.74866200  | 8.43541700  |
| H                          | -0.81997400                                             | 9.60053600  | 4.60084900  | C         | -4.47143400                                             | 8.46415100  | 10.39356200 |
| C                          | -4.24747500                                             | 6.22669700  | 6.75551800  | H         | -2.51553100                                             | 9.29699400  | 10.76013500 |
| C                          | -4.93920700                                             | 5.94633800  | 5.57391400  | H         | -6.26804000                                             | 7.40189600  | 9.84310700  |
| C                          | -4.95972900                                             | 6.54213500  | 7.91726800  | H         | -4.98945700                                             | 9.19106100  | 11.01231500 |
| C                          | -6.33248700                                             | 5.98507400  | 5.55394900  |           |                                                         |             |             |
| H                          | -4.37424100                                             | 5.72497800  | 4.67477500  | <b>Oy</b> | $E_{M06(\text{trifluoromethylbenzene})} = -1830.605842$ |             |             |
| C                          | -6.35379800                                             | 6.58247100  | 7.89424700  | C         | -2.46077300                                             | 5.56133800  | 7.51431800  |
| H                          | -4.42658300                                             | 6.76538400  | 8.83713200  | C         | -1.68045200                                             | 5.98031000  | 6.32831900  |
| C                          | -7.04437400                                             | 6.30346300  | 6.71290200  | C         | -0.00037900                                             | 4.79547700  | 7.64436400  |
| H                          | -6.86283900                                             | 5.77692300  | 4.62855600  | C         | 0.31278200                                              | 3.95629600  | 6.53455200  |
| H                          | -6.89958000                                             | 6.83373000  | 8.79971000  | C         | 1.30964400                                              | 2.95057900  | 6.64146500  |
| H                          | -8.13029700                                             | 6.33856100  | 6.69485500  | C         | 1.95320400                                              | 2.75992800  | 7.84587400  |
|                            |                                                         |             |             | C         | 1.60939800                                              | 3.56989500  | 8.95260100  |
|                            |                                                         |             |             | C         | 0.65464100                                              | 4.57754200  | 8.86125300  |
| <b>TS<sub>My1-Oy</sub></b> | $E_{M06(\text{trifluoromethylbenzene})} = -1830.598972$ |             |             | C         | -0.46979300                                             | 4.08390200  | 5.37446500  |
| C                          | -2.45744500                                             | 5.58772200  | 7.88173000  | H         | 1.54516200                                              | 2.33652100  | 5.77613100  |
| C                          | -1.83871300                                             | 6.16346000  | 6.69339700  | H         | 2.71696500                                              | 1.99684800  | 7.94923900  |
| C                          | 0.05328000                                              | 4.90626400  | 7.64214800  | H         | 2.11483900                                              | 3.40856900  | 9.90066500  |
| C                          | 0.24986900                                              | 4.10667900  | 6.48670200  | H         | 0.41184900                                              | 5.20729700  | 9.71035800  |
| C                          | 1.27577200                                              | 3.13468000  | 6.45801600  | H         | -0.30747800                                             | 3.44660600  | 4.50357800  |
| C                          | 2.07222000                                              | 2.93497000  | 7.57199800  | H         | -0.91486200                                             | 5.82635500  | 7.51663200  |
| C                          | 1.85014100                                              | 3.71162200  | 8.72402200  | N         | -1.44184900                                             | 4.90555400  | 5.23817600  |
| C                          | 0.86034200                                              | 4.69163000  | 8.76203000  | O         | -3.99968900                                             | 1.71405100  | 7.76762000  |
| C                          | -0.64563200                                             | 4.22686000  | 5.38159900  | C         | -4.43536900                                             | -0.41563100 | 8.38696300  |
| H                          | 1.42032700                                              | 2.54172100  | 5.55819000  | C         | -5.35133500                                             | -0.06777700 | 7.44658100  |
| H                          | 2.86002200                                              | 2.18945300  | 7.55972800  | H         | -4.29236100                                             | -1.33700000 | 8.93005200  |
| H                          | 2.47209300                                              | 3.55491700  | 9.60065600  | H         | -6.16381700                                             | -0.62677000 | 7.00867100  |
| H                          | 0.70695600                                              | 5.30378500  | 9.64443300  | C         | -2.51972800                                             | 0.73311800  | 9.53434100  |
| H                          | -0.47928900                                             | 3.60721800  | 4.49112700  | C         | -5.85834800                                             | 1.99454000  | 6.10625200  |
| N                          | -0.90298400                                             | 5.92442900  | 7.68838300  | N         | -5.06717800                                             | 1.23618700  | 7.07621000  |
| O                          | -1.65311500                                             | 4.97521800  | 5.34990900  | N         | -3.61420800                                             | 0.68544700  | 8.56751700  |
| C                          | -3.96539600                                             | 1.72977800  | 7.76101500  | Au        | -3.18959600                                             | 3.60820600  | 7.64517400  |
| C                          | -4.52790600                                             | -0.41448000 | 8.19822500  | H         | -5.28948100                                             | 2.86666800  | 5.78287700  |
| C                          | -5.21600000                                             | -0.02910900 | 7.09278000  | H         | -6.07252400                                             | 1.36213800  | 5.24150100  |
| H                          | -4.51243000                                             | -1.35201300 | 8.73229500  | H         | -6.79700300                                             | 2.32230200  | 6.56165000  |
| H                          | -5.91912800                                             | -0.56472800 | 6.47376900  | H         | -2.91460800                                             | 0.85793100  | 10.54663900 |
| C                          | -2.89055700                                             | 0.66661500  | 9.76175800  | H         | -1.94524000                                             | -0.19483900 | 9.47801200  |
| C                          | -5.40696700                                             | 2.06952500  | 5.73076600  | H         | -1.87166300                                             | 1.57631500  | 9.29326700  |
| N                          | -4.85949000                                             | 1.28484200  | 6.83871800  | N         | -1.69872200                                             | 7.21470400  | 5.69479800  |
| N                          | -3.76783900                                             | 0.67424200  | 8.59310400  | C         | -0.43202000                                             | 7.75423000  | 5.17820300  |
| Au                         | -3.14886900                                             | 3.61953100  | 7.84986300  | H         | -0.11192300                                             | 7.24712600  | 4.26212300  |
| H                          | -6.48914400                                             | 2.16984100  | 5.84896000  | H         | -0.55148400                                             | 8.81702000  | 4.96198000  |
| H                          | -4.95229800                                             | 3.06064000  | 5.73292800  | H         | 0.31920700                                              | 7.64212000  | 5.96412400  |
| H                          | -5.18762500                                             | 1.57088400  | 4.78288000  | S         | -3.14423500                                             | 7.59858100  | 4.81232600  |
| H                          | -3.47710400                                             | 0.47752200  | 10.66486300 | O         | -4.07647100                                             | 6.50067300  | 5.06670800  |
| H                          | -2.13023400                                             | -0.11125300 | 9.64978800  | O         | -2.72615500                                             | 7.96150800  | 3.46033000  |
| H                          | -2.40594100                                             | 1.63949400  | 9.84417700  | C         | -3.70086300                                             | 9.08317200  | 5.66021200  |
| N                          | -2.00358700                                             | 7.32783600  | 6.02802000  | H         | -3.93183600                                             | 8.83554800  | 6.69593000  |
| C                          | -0.85888800                                             | 7.96173400  | 5.35750600  | H         | -2.90943400                                             | 9.83234800  | 5.59456200  |
| H                          | 0.00875900                                              | 7.84927700  | 6.01208600  | H         | -4.59046800                                             | 9.42853300  | 5.12757900  |
| H                          | -0.66993600                                             | 7.50567600  | 4.38197200  | C         | -3.21895900                                             | 6.63944900  | 8.23655800  |
| H                          | -1.06202900                                             | 9.02454900  | 5.21835200  | C         | -2.57910300                                             | 7.65468000  | 8.95906300  |
| S                          | -3.60923800                                             | 7.65350000  | 5.39982900  | C         | -4.62143800                                             | 6.64191000  | 8.16156000  |
| O                          | -4.42697000                                             | 6.49545200  | 5.74970700  | C         | -3.32303100                                             | 8.65244700  | 9.59178600  |
| O                          | -3.41050400                                             | 8.08515800  | 4.02079700  | H         | -1.49589300                                             | 7.66188500  | 9.01428200  |
| C                          | -4.09365000                                             | 9.06847600  | 6.39867900  | C         | -5.36299800                                             | 7.64615100  | 8.78346400  |
| H                          | -4.14094900                                             | 8.76396500  | 7.44445100  | H         | -5.12736900                                             | 5.87113400  | 7.58909300  |
| H                          | -3.36422400                                             | 9.86569200  | 6.24274200  | C         | -4.71689100                                             | 8.65554800  | 9.50297900  |
| H                          | -5.07567500                                             | 9.37989300  | 6.03346300  |           |                                                         |             |             |

|                           |                                                               |            |             |                           |                                                               |             |             |
|---------------------------|---------------------------------------------------------------|------------|-------------|---------------------------|---------------------------------------------------------------|-------------|-------------|
| H                         | -2.81130700                                                   | 9.43002500 | 10.15210600 | C                         | -0.06519000                                                   | 3.80638400  | 5.74714600  |
| H                         | -6.44653500                                                   | 7.63877000 | 8.70637500  | C                         | 0.88219800                                                    | 3.00386600  | 5.10126200  |
| H                         | -5.29489300                                                   | 9.43354000 | 9.99321000  | C                         | 2.16060000                                                    | 2.83294600  | 5.62973400  |
|                           |                                                               |            |             | C                         | 2.51774400                                                    | 3.46690800  | 6.82716100  |
| <b>TS<sub>Oy-Qy</sub></b> | <b>E<sub>M06(trifluoromethylbenzene)</sub> = -1830.581144</b> |            |             | C                         | 1.58863200                                                    | 4.24816400  | 7.50096900  |
| C                         | -2.00408400                                                   | 5.27103300 | 7.12565700  | C                         | -1.45533500                                                   | 3.93578100  | 5.22222500  |
| C                         | -1.56587600                                                   | 5.81758000 | 5.85022600  | H                         | 0.60777700                                                    | 2.50496300  | 4.17527400  |
| C                         | 0.49914600                                                    | 5.08798300 | 7.17359300  | H                         | 2.87850200                                                    | 2.20392400  | 5.11208900  |
| C                         | 0.55101900                                                    | 3.96779600 | 6.31652000  | H                         | 3.51353100                                                    | 3.33396800  | 7.23867900  |
| C                         | 1.72665600                                                    | 3.20520700 | 6.26367700  | H                         | 1.83132700                                                    | 4.72675200  | 8.44431100  |
| C                         | 2.82714300                                                    | 3.57819100 | 7.02798200  | H                         | -1.50511900                                                   | 3.54445200  | 4.20587100  |
| C                         | 2.77826500                                                    | 4.72398900 | 7.83966900  | N                         | -0.60792900                                                   | 5.14777600  | 7.73973600  |
| C                         | 1.61935600                                                    | 5.48969100 | 7.90918100  | O                         | -1.62145000                                                   | 5.43564500  | 4.91356500  |
| C                         | -0.64622100                                                   | 3.72910900 | 5.49818600  | C                         | -4.55776900                                                   | 2.35371500  | 7.51633200  |
| H                         | 1.77917700                                                    | 2.34347000 | 5.60360100  | C                         | -5.88726900                                                   | 1.84389500  | 9.26959300  |
| H                         | 3.73893000                                                    | 2.99052700 | 6.98101800  | C                         | -6.39748100                                                   | 1.21955600  | 8.17649200  |
| H                         | 3.64760500                                                    | 5.00912800 | 8.42399400  | H                         | -6.22050200                                                   | 1.86047800  | 10.29568800 |
| H                         | 1.55304600                                                    | 6.36942500 | 8.54097900  | H                         | -7.25676600                                                   | 0.57673500  | 8.06356000  |
| H                         | -0.50086300                                                   | 3.03951200 | 4.66617400  | C                         | -3.95200300                                                   | 3.37889300  | 9.72235900  |
| N                         | -0.71595100                                                   | 5.78760500 | 7.30891300  | C                         | -5.75730300                                                   | 1.02575800  | 5.75931500  |
| O                         | -1.05565900                                                   | 4.99536100 | 4.91605500  | N                         | -5.57256000                                                   | 1.54474600  | 7.11287400  |
| C                         | -4.03082500                                                   | 2.25025600 | 7.57178600  | N                         | -4.76060300                                                   | 2.52866300  | 8.84806400  |
| C                         | -5.58291900                                                   | 1.64207400 | 9.08811000  | Au                        | -3.03030800                                                   | 3.16246100  | 6.38031800  |
| C                         | -6.21706900                                                   | 1.81240500 | 7.89673600  | H                         | -5.10353600                                                   | 1.57220300  | 5.07961600  |
| H                         | -5.96060200                                                   | 1.35356900 | 10.05667300 | H                         | -5.50657000                                                   | -0.03834200 | 5.72673700  |
| H                         | -7.25325200                                                   | 1.68770800 | 7.62318500  | H                         | -6.79706600                                                   | 1.16625100  | 5.45343200  |
| C                         | -3.22102000                                                   | 1.94825600 | 9.90964600  | H                         | -4.42765300                                                   | 4.35402500  | 9.84866900  |
| C                         | -5.50084800                                                   | 2.46666800 | 5.56348100  | H                         | -3.84323500                                                   | 2.89058800  | 10.69348100 |
| N                         | -5.25014600                                                   | 2.18822700 | 6.98135000  | H                         | -2.96710800                                                   | 3.51774800  | 9.27767300  |
| N                         | -4.24344100                                                   | 1.90945000 | 8.86533300  | N                         | -1.87975100                                                   | 7.55668600  | 5.49989000  |
| Au                        | -2.29735800                                                   | 3.02392400 | 6.66818100  | C                         | -2.29108600                                                   | 7.86041400  | 4.11324800  |
| H                         | -4.98892000                                                   | 3.38517300 | 5.26749700  | H                         | -2.97832900                                                   | 7.08417800  | 3.77512200  |
| H                         | -5.14692700                                                   | 1.63454200 | 4.94970300  | H                         | -2.81346600                                                   | 8.81851600  | 4.11752800  |
| H                         | -6.57451700                                                   | 2.59305200 | 5.41588100  | H                         | -1.42907000                                                   | 7.89053000  | 3.44145800  |
| H                         | -3.18394200                                                   | 2.94637500 | 10.35482900 | S                         | -1.49697800                                                   | 8.98739000  | 6.52617800  |
| H                         | -3.45958200                                                   | 1.20744200 | 10.67516200 | O                         | -0.79004100                                                   | 8.49650400  | 7.69669900  |
| H                         | -2.25228300                                                   | 1.71009700 | 9.46820700  | O                         | -2.72795100                                                   | 9.75702700  | 6.58808400  |
| N                         | -1.96715500                                                   | 7.05930600 | 5.31780700  | C                         | -0.30214100                                                   | 9.81200600  | 5.45789700  |
| C                         | -1.98063300                                                   | 8.24334800 | 6.19933700  | H                         | 0.52595000                                                    | 9.12682000  | 5.26787400  |
| H                         | -0.98066600                                                   | 8.34832300 | 6.62075000  | H                         | -0.77835800                                                   | 10.14762300 | 4.53666400  |
| H                         | -2.21375400                                                   | 9.11778300 | 5.59339600  | H                         | 0.04376200                                                    | 10.67320800 | 6.03646100  |
| H                         | -2.71569600                                                   | 8.16030100 | 7.00652500  | C                         | -2.62533800                                                   | 6.35460600  | 8.25678200  |
| S                         | -3.31043200                                                   | 6.88557300 | 4.21735400  | C                         | -2.31366200                                                   | 6.50890100  | 9.61719300  |
| O                         | -4.09188000                                                   | 8.11460400 | 4.31708600  | C                         | -3.93160300                                                   | 6.61056800  | 7.81341400  |
| O                         | -3.93389300                                                   | 5.57372200 | 4.46361400  | C                         | -3.29298600                                                   | 6.92395600  | 10.51324600 |
| C                         | -2.46698700                                                   | 6.81667200 | 2.63378200  | H                         | -1.29877800                                                   | 6.31792600  | 9.94745200  |
| H                         | -1.94278300                                                   | 7.76244400 | 2.48750500  | C                         | -4.91410000                                                   | 7.01711200  | 8.71711300  |
| H                         | -1.77197200                                                   | 5.97685000 | 2.66091900  | H                         | -4.19272900                                                   | 6.47104700  | 6.76790100  |
| H                         | -3.23448900                                                   | 6.67383900 | 1.86912100  | C                         | -4.59594800                                                   | 7.17982600  | 10.06690800 |
| C                         | -3.07762300                                                   | 5.58149700 | 8.06982100  | H                         | -3.04084600                                                   | 7.06082700  | 11.56067800 |
| C                         | -2.75217500                                                   | 5.72558200 | 9.43174000  | H                         | -5.92295700                                                   | 7.21007400  | 8.36516800  |
| C                         | -4.42048900                                                   | 5.65462200 | 7.65322100  | H                         | -5.35617600                                                   | 7.51051600  | 10.76854500 |
| C                         | -3.76073100                                                   | 5.93423500 | 10.36731200 |                           |                                                               |             |             |
| H                         | -1.70988100                                                   | 5.68704700 | 9.73369600  | <b>TS<sub>Qy-Ay</sub></b> | <b>E<sub>M06(trifluoromethylbenzene)</sub> = -1830.611328</b> |             |             |
| C                         | -5.42123200                                                   | 5.87387200 | 8.59507300  | C                         | -1.20188200                                                   | 6.39246300  | 7.41634400  |
| H                         | -4.65869600                                                   | 5.54053900 | 6.60186300  | C                         | -1.53733900                                                   | 5.82490700  | 6.04120000  |
| C                         | -5.09599800                                                   | 6.00644900 | 9.95020300  | C                         | 0.49398500                                                    | 4.77935900  | 7.85315600  |
| H                         | -3.51133800                                                   | 6.05395000 | 11.41747900 | C                         | 0.39104400                                                    | 4.06544100  | 6.63435700  |
| H                         | -6.45615600                                                   | 5.94649100 | 8.27485000  | C                         | 1.15983000                                                    | 2.91186400  | 6.42099900  |
| H                         | -5.88135400                                                   | 6.17730300 | 10.68083100 | C                         | 2.05263700                                                    | 2.48198300  | 7.39947200  |
|                           |                                                               |            |             | C                         | 2.17887700                                                    | 3.19930200  | 8.59819300  |
| <b>Qy</b>                 | <b>E<sub>M06(trifluoromethylbenzene)</sub> = -1830.630745</b> |            |             | C                         | 1.40849700                                                    | 4.33531200  | 8.82415300  |
| C                         | -1.59396900                                                   | 5.86334300 | 7.31606800  | C                         | -0.58731700                                                   | 4.52886200  | 5.64211700  |
| C                         | -1.70284100                                                   | 6.27823500 | 5.87657500  | H                         | 1.06314900                                                    | 2.36970200  | 5.48377000  |
| C                         | 0.30133100                                                    | 4.44488900 | 6.96549200  | H                         | 2.66164500                                                    | 1.60033000  | 7.22530000  |

|            |                                                               |             |             |                             |                                                               |             |             |
|------------|---------------------------------------------------------------|-------------|-------------|-----------------------------|---------------------------------------------------------------|-------------|-------------|
| H          | 2.88484200                                                    | 2.86785100  | 9.35360700  | H                           | -4.81311100                                                   | 5.73235900  | 6.02661100  |
| H          | 1.49055700                                                    | 4.90317200  | 9.74510800  | H                           | -3.74474800                                                   | 4.36470800  | 6.46052900  |
| H          | -0.81416400                                                   | 3.89206500  | 4.78615300  | S                           | -3.11907600                                                   | 5.87570500  | 3.86231700  |
| N          | -0.27245300                                                   | 5.89459400  | 8.16206500  | O                           | -4.56049200                                                   | 6.10303400  | 3.72725700  |
| O          | -0.46897100                                                   | 5.89396400  | 5.16199100  | O                           | -2.53057000                                                   | 4.64504400  | 3.31629000  |
| C          | -3.84680000                                                   | 1.88207100  | 6.96337300  | C                           | -2.25502900                                                   | 7.28960100  | 3.16183000  |
| C          | -5.19257500                                                   | 0.36637200  | 7.92802300  | H                           | -2.68539200                                                   | 8.19811600  | 3.58501300  |
| C          | -5.74687800                                                   | 0.70967700  | 6.73533700  | H                           | -1.19153000                                                   | 7.19800200  | 3.37895900  |
| H          | -5.51686100                                                   | -0.32924600 | 8.68640500  | H                           | -2.43926900                                                   | 7.24397500  | 2.08566300  |
| H          | -6.65461100                                                   | 0.37827300  | 6.25536400  | C                           | -1.81442700                                                   | 7.69344100  | 7.80900700  |
| C          | -3.10727500                                                   | 0.98073500  | 9.18887000  | C                           | -2.25830400                                                   | 8.66937800  | 6.90148900  |
| C          | -5.17751400                                                   | 2.30305700  | 4.86834800  | C                           | -2.00179500                                                   | 7.91201400  | 9.18512800  |
| N          | -4.90589600                                                   | 1.64038200  | 6.15115400  | C                           | -2.87596200                                                   | 9.83209400  | 7.35893600  |
| N          | -4.02396900                                                   | 1.09828100  | 8.05355700  | H                           | -2.10490200                                                   | 8.52386800  | 5.83975200  |
| Au         | -2.37031500                                                   | 3.17447300  | 6.56313900  | C                           | -2.63148500                                                   | 9.06799100  | 9.63909500  |
| H          | -4.24150100                                                   | 2.61297800  | 4.40262900  | H                           | -1.64335300                                                   | 7.16315700  | 9.88354500  |
| H          | -5.68988600                                                   | 1.59653800  | 4.21305900  | C                           | -3.07231000                                                   | 10.03162100 | 8.72727700  |
| H          | -5.80855200                                                   | 3.18229000  | 5.02336600  | H                           | -3.20472100                                                   | 10.58284900 | 6.64561100  |
| H          | -3.66953400                                                   | 1.08458700  | 10.11965600 | H                           | -2.77890300                                                   | 9.21864300  | 10.70506100 |
| H          | -2.60906900                                                   | 0.00803000  | 9.16440600  | H                           | -3.56446600                                                   | 10.93333800 | 9.08147700  |
| H          | -2.36091400                                                   | 1.77273400  | 9.12641800  |                             |                                                               |             |             |
| N          | -2.81965700                                                   | 6.12341400  | 5.48746200  | <b>TS<sub>My1-Fy3</sub></b> | <b>E<sub>M06(trifluoromethylbenzene)</sub> = -1830.609140</b> |             |             |
| C          | -4.02406400                                                   | 6.03597200  | 6.35041900  | C                           | -3.11901400                                                   | 5.15743800  | 10.87243000 |
| H          | -3.70895900                                                   | 6.02608400  | 7.39134700  | C                           | -2.47418700                                                   | 5.90287500  | 9.78365900  |
| H          | -4.65296800                                                   | 6.90953600  | 6.17994600  | C                           | 0.06218300                                                    | 5.60663300  | 9.96411800  |
| H          | -4.59994900                                                   | 5.12892200  | 6.14922700  | C                           | 0.54415600                                                    | 4.48886100  | 9.20830000  |
| S          | -3.15677100                                                   | 5.69319500  | 3.84152300  | C                           | 1.91056500                                                    | 4.15499300  | 9.28610800  |
| O          | -4.59366800                                                   | 5.91374500  | 3.69173500  | C                           | 2.80482600                                                    | 4.89035600  | 10.04905100 |
| O          | -2.60327500                                                   | 4.35817100  | 3.55160400  | C                           | 2.32956900                                                    | 5.99703500  | 10.76966400 |
| C          | -2.25593600                                                   | 6.92535000  | 2.89640300  | C                           | 0.98795900                                                    | 6.34678400  | 10.73723800 |
| H          | -2.62961700                                                   | 7.90865900  | 3.18668400  | C                           | -0.29194200                                                   | 3.68086300  | 8.32794800  |
| H          | -1.19140400                                                   | 6.81888900  | 3.10191300  | H                           | 2.26228000                                                    | 3.29679900  | 8.71754900  |
| H          | -2.47922300                                                   | 6.72236100  | 1.84579600  | H                           | 3.85360300                                                    | 4.61591900  | 10.08801100 |
| C          | -1.88442300                                                   | 7.61717300  | 7.90200100  | H                           | 3.01561500                                                    | 6.58538000  | 11.37233500 |
| C          | -2.27179900                                                   | 8.64531000  | 7.02440700  | H                           | 0.61826700                                                    | 7.19252900  | 11.30762100 |
| C          | -2.08122800                                                   | 7.78682100  | 9.28359700  | H                           | 0.24781400                                                    | 2.84800700  | 7.83222300  |
| C          | -2.84620300                                                   | 9.81386700  | 7.52069500  | N                           | -1.22754800                                                   | 5.99236200  | 9.98430100  |
| H          | -2.10803400                                                   | 8.53948700  | 5.95756400  | O                           | -1.48524500                                                   | 3.85253900  | 8.08852600  |
| C          | -2.67073500                                                   | 8.94904500  | 9.77319500  | C                           | -4.14020200                                                   | 1.39699400  | 9.59966900  |
| H          | -1.76090500                                                   | 7.00074600  | 9.95923600  | C                           | -4.82854700                                                   | -0.74162300 | 9.39503900  |
| C          | -3.05534000                                                   | 9.96556900  | 8.89372600  | C                           | -4.75476100                                                   | -0.21010500 | 8.14501100  |
| H          | -3.12638400                                                   | 10.60862700 | 6.83566500  | H                           | -5.10863700                                                   | -1.72793500 | 9.73081600  |
| H          | -2.82685200                                                   | 9.06541400  | 10.84161600 | H                           | -4.95903800                                                   | -0.64573100 | 7.17940700  |
| H          | -3.51188400                                                   | 10.87337400 | 9.27703900  | C                           | -4.42692600                                                   | 0.10115400  | 11.72445200 |
|            |                                                               |             |             | C                           | -4.13083700                                                   | 2.04426800  | 7.18592200  |
| <b>PQy</b> | <b>E<sub>M06(trifluoromethylbenzene)</sub> = -1390.291061</b> |             |             | N                           | -4.32990200                                                   | 1.09637700  | 8.28979800  |
| C          | -1.10821800                                                   | 6.46808500  | 7.36073700  | N                           | -4.44647200                                                   | 0.25759400  | 10.27230600 |
| C          | -1.44883700                                                   | 5.81568500  | 6.03232800  | Au                          | -3.57003600                                                   | 3.24255300  | 10.31080000 |
| C          | 0.50409400                                                    | 4.81640300  | 7.83552000  | H                           | -4.22470300                                                   | 1.50083700  | 6.24423500  |
| C          | 0.27767200                                                    | 4.05598400  | 6.66753400  | H                           | -4.88052400                                                   | 2.83630100  | 7.23377300  |
| C          | 0.93916900                                                    | 2.84013100  | 6.48569400  | H                           | -3.13765400                                                   | 2.49017300  | 7.26382300  |
| C          | 1.85558600                                                    | 2.38999700  | 7.43702000  | H                           | -3.86258800                                                   | 0.92600800  | 12.15973700 |
| C          | 2.10812000                                                    | 3.15645300  | 8.58083300  | H                           | -5.44721800                                                   | 0.10872900  | 12.11855100 |
| C          | 1.43479200                                                    | 4.35869400  | 8.78139400  | H                           | -3.94194700                                                   | -0.84336600 | 11.98264800 |
| C          | -0.69353100                                                   | 4.57310200  | 5.69329500  | N                           | -3.12692200                                                   | 6.40889600  | 8.67325800  |
| H          | 0.74393200                                                    | 2.25529100  | 5.59007100  | C                           | -2.37593900                                                   | 6.65195700  | 7.42859500  |
| H          | 2.37743500                                                    | 1.44967600  | 7.28413700  | H                           | -1.33464400                                                   | 6.82590800  | 7.69945100  |
| H          | 2.82601600                                                    | 2.80943300  | 9.31873000  | H                           | -2.44260300                                                   | 5.78356100  | 6.77211300  |
| H          | 1.59973900                                                    | 4.96138600  | 9.66900400  | H                           | -2.75866600                                                   | 7.54518400  | 6.93136300  |
| H          | -1.14927500                                                   | 3.88595600  | 4.98609800  | S                           | -4.83901300                                                   | 6.22776900  | 8.53234600  |
| N          | -0.18994700                                                   | 5.99146300  | 8.13400100  | O                           | -5.33289900                                                   | 5.98412700  | 9.88983000  |
| O          | -0.39725900                                                   | 5.87155700  | 5.08497900  | O                           | -5.10849700                                                   | 5.29552400  | 7.43972800  |
| N          | -2.79588200                                                   | 6.05646200  | 5.54485100  | C                           | -5.35994000                                                   | 7.87813100  | 8.03502700  |
| C          | -3.83135400                                                   | 5.45843000  | 6.41064700  | H                           | -6.45198200                                                   | 7.84220900  | 8.00290200  |
| H          | -3.71874700                                                   | 5.87777800  | 7.41306600  | H                           | -5.02221300                                                   | 8.59076700  | 8.78904500  |

|   |             |            |             |   |             |            |             |
|---|-------------|------------|-------------|---|-------------|------------|-------------|
| H | -4.96638500 | 8.11427800 | 7.04564000  | C | -4.64471100 | 6.60374300 | 12.43422100 |
| C | -3.25550400 | 5.77582600 | 12.15404400 | H | -3.94361100 | 8.34849200 | 11.36910500 |
| C | -3.65511900 | 4.99859900 | 13.27118700 | H | -5.29206100 | 4.71605000 | 13.26189000 |
| C | -3.05565100 | 7.17138000 | 12.34019400 | H | -4.90711000 | 7.16658500 | 13.32574000 |
| C | -3.84614600 | 5.58578000 | 14.51432200 |   |             |            |             |
| H | -3.81236800 | 3.93344400 | 13.13495400 |   |             |            |             |
| C | -3.24841900 | 7.75361500 | 13.58160900 |   |             |            |             |
| H | -2.74783200 | 7.78301000 | 11.49845400 |   |             |            |             |
| C | -3.64338600 | 6.96176400 | 14.67076400 |   |             |            |             |
| H | -4.15194100 | 4.98108200 | 15.36223300 |   |             |            |             |
| H | -3.09773200 | 8.82057400 | 13.71357000 |   |             |            |             |
| H | -3.79392000 | 7.42192300 | 15.64319200 |   |             |            |             |

**Fy3**  $E_{M06(\text{trifluoromethylbenzene})} = -1830.621956$

|    |             |             |             |
|----|-------------|-------------|-------------|
| C  | -3.63712500 | 4.39824300  | 8.97829500  |
| C  | -2.71571000 | 4.96848700  | 7.96405900  |
| C  | -0.79887300 | 5.01472100  | 9.41229500  |
| C  | -0.27542400 | 3.76224100  | 9.83384200  |
| C  | 0.47314300  | 3.69862900  | 11.02439000 |
| C  | 0.72092100  | 4.83007000  | 11.79034700 |
| C  | 0.22917700  | 6.06357700  | 11.35082600 |
| C  | -0.51119200 | 6.15727800  | 10.17429900 |
| C  | -0.43953900 | 2.51617400  | 9.07686000  |
| H  | 0.86656400  | 2.73448600  | 11.33894100 |
| H  | 1.29983800  | 4.76088600  | 12.70538000 |
| H  | 0.42663300  | 6.96353800  | 11.92634900 |
| H  | -0.86928400 | 7.11982600  | 9.82550000  |
| H  | 0.07649800  | 1.64667900  | 9.53702000  |
| N  | -1.47379700 | 5.16221900  | 8.20236800  |
| O  | -1.06335700 | 2.36304600  | 8.03315000  |
| C  | -4.66567700 | 0.61065900  | 7.80767500  |
| C  | -4.66157300 | -1.54435700 | 7.15223600  |
| C  | -5.85289800 | -1.00412600 | 6.77950100  |
| H  | -4.26590600 | -2.54017700 | 7.02797200  |
| H  | -6.69392800 | -1.43594500 | 6.26004800  |
| C  | -2.60068500 | -0.68951800 | 8.33457200  |
| C  | -6.89805500 | 1.29520100  | 6.93689000  |
| N  | -5.83646600 | 0.31626600  | 7.19082000  |
| N  | -3.94587700 | -0.53735000 | 7.77617200  |
| Au | -4.11407800 | 2.46434700  | 8.51114800  |
| H  | -6.51528000 | 2.09532500  | 6.29933100  |
| H  | -7.72932600 | 0.78984400  | 6.44301600  |
| H  | -7.24093100 | 1.71798600  | 7.88377100  |
| H  | -2.65760100 | -0.82594900 | 9.41827300  |
| H  | -2.13233300 | -1.56651800 | 7.88415400  |
| H  | -2.01035000 | 0.19901000  | 8.10080900  |
| N  | -3.12901900 | 5.03486900  | 6.62961800  |
| C  | -2.14654300 | 4.80178600  | 5.55515500  |
| H  | -1.45178200 | 4.03207500  | 5.89596800  |
| H  | -2.67506700 | 4.43924200  | 4.67107400  |
| H  | -1.59631200 | 5.71709400  | 5.32252500  |
| S  | -4.78090300 | 5.11109300  | 6.24584600  |
| O  | -5.46151600 | 5.36023600  | 7.52595900  |
| O  | -5.14656300 | 3.96293700  | 5.41506200  |
| C  | -4.87791400 | 6.59614000  | 5.23390900  |
| H  | -4.56373100 | 7.44800900  | 5.83885500  |
| H  | -4.23994700 | 6.47357800  | 4.35649800  |
| H  | -5.92224400 | 6.69842900  | 4.92878400  |
| C  | -3.96703100 | 5.15315900  | 10.13310400 |
| C  | -3.75555400 | 6.55976400  | 10.19539000 |
| C  | -4.54160800 | 4.50242900  | 11.25984000 |
| C  | -4.09648000 | 7.27466000  | 11.33042600 |
| H  | -3.34319600 | 7.06900000  | 9.33121000  |
| C  | -4.86500500 | 5.21968100  | 12.40072100 |
| H  | -4.70881600 | 3.43103400  | 11.21173700 |
